# Supplementary material for: A randomised cross-over cohort study of exposure to emissions from a road tunnel ventilation stack
Source: PubMed Central journal article supplement — BMJ Open. 2012 Aug 16;2(4):e001201. doi: 10.1136/bmjopen-2012-001201 (PMC3425893; doi:10.1136/bmjopen-2012-001201), 2012-08-16
Supplement: bmjopen-2012-001201.draft_revisions.pdf [file bmjopen-2012-001201.draft_revisions.pdf]

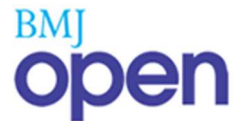

**A randomised cross-over cohort study of exposure to emissions from a road tunnel ventilation stack**

|                                 |                                                                                                                                                                                                                                                                                                                                                                                                                                                                                                                                  |
|---------------------------------|----------------------------------------------------------------------------------------------------------------------------------------------------------------------------------------------------------------------------------------------------------------------------------------------------------------------------------------------------------------------------------------------------------------------------------------------------------------------------------------------------------------------------------|
| Journal:                        | <i>BMJ Open</i>                                                                                                                                                                                                                                                                                                                                                                                                                                                                                                                  |
| Manuscript ID:                  | bmjopen-2012-001201                                                                                                                                                                                                                                                                                                                                                                                                                                                                                                              |
| Article Type:                   | Research                                                                                                                                                                                                                                                                                                                                                                                                                                                                                                                         |
| Date Submitted by the Author:   | 03-Apr-2012                                                                                                                                                                                                                                                                                                                                                                                                                                                                                                                      |
| Complete List of Authors:       | Cowie, Christine; Woolcock Institute of Medical Research, Respiratory & Environmental Epidemiology<br>Ezz, Wafaa; Woolcock Institute of Medical Research, Respiratory & Environmental Epidemiology<br>Xuan, Wei; Woolcock Institute of Medical Research, Respiratory & Environmental Epidemiology<br>Lilley, William; CSIRO, CSIRO Energy Technology<br>Rose, Nectarios; NSW Health Department,<br>Rae, Michael; CSIRO, CSIRO Energy Technology<br>Marks, Guy; Woolcock Institute of Medical Research, The University of Sydney, |
| <b>Primary Subject Heading</b>: | Epidemiology                                                                                                                                                                                                                                                                                                                                                                                                                                                                                                                     |
| Secondary Subject Heading:      | Respiratory medicine, Public health                                                                                                                                                                                                                                                                                                                                                                                                                                                                                              |
| Keywords:                       | Epidemiology < THORACIC MEDICINE, EPIDEMIOLOGY, PUBLIC HEALTH, TRAFFIC, AIR POLLUTION, ACUTE                                                                                                                                                                                                                                                                                                                                                                                                                                     |
|                                 |                                                                                                                                                                                                                                                                                                                                                                                                                                                                                                                                  |

SCHOLARONE™  
Manuscripts

only

**TITLE PAGE****Title**

A randomised cross-over cohort study of exposure to emissions from a road tunnel  
ventilation stack

**Authors**

Christine T. Cowie<sup>a,b</sup>, Wafaa Ezz<sup>a,b</sup>, Wei Xuan<sup>ab</sup>, William Lilley<sup>c</sup>, Nectarios Rose<sup>a,d</sup>, Michael  
Rae<sup>c</sup>, Guy B. Marks<sup>a</sup>

**Author affiliations**

- a. Woolcock Institute of Medical Research, Sydney, NSW, Australia
- b. Cooperative Research Centre for Asthma and Airways, Sydney, Australia
- c. Commonwealth Scientific and Industrial Research Organisation, Newcastle, Australia
- d. NSW Health Department, Sydney, NSW, Australia

**Corresponding author**

Guy Marks

Respiratory and Environmental Epidemiology

Woolcock Institute of Medical Research

PO Box M77

Missenden Road PO

Sydney NSW 2050

Australia

Tel: +61 2 9114 0466

fax: +61 2 9114 0000

1  
2  
3 email: [guy.marks@sydney.edu.au](mailto:guy.marks@sydney.edu.au)  
4  
5  
6

7 **Keywords**  
8

9  
10 Road tunnel, respiratory, emissions, stack, acute exposures  
11

12  
13 **Word count:** 3589  
14  
15  
16  
17  
18  
19  
20  
21  
22  
23  
24  
25  
26  
27  
28  
29  
30  
31  
32  
33  
34  
35  
36  
37  
38  
39  
40  
41  
42  
43  
44  
45  
46  
47  
48  
49  
50  
51  
52  
53  
54  
55  
56  
57  
58  
59  
60

For peer review only

## ABSTRACT

### Background & objective

Road tunnels are increasingly important components of urban infrastructure. However knowledge of their health impact on surrounding communities is limited. Our objective was to estimate the short-term respiratory health effects of exposure to emissions from a road tunnel ventilation stack.

### Methods

We conducted a randomised cross-over cohort study in 36 volunteers who underwent three exposure scenarios in 2006 before the road tunnel opened, and in 2007 (n=27) and 2008 (n=20) after the tunnel opened. Exposure downwind of the stack was compared to upwind of the stack and to a distant heavily trafficked location adjacent to a main road. Spirometry, exhaled nitric oxide (eNO), and symptom scores were measured repeatedly during each two hour exposure session.

### Results

Downwind locations were associated with increased reports of “dry nose” (score difference 0.36; 95% CI 0.09-0.63) compared with the control location (2006 vs 2007/08), but not with impaired lung function, increased airway inflammation or other symptoms. The heavily trafficked location was associated with significantly increased eNO (ratio=1.09; 95% CI: 1.04-1.14), eye (score difference 0.05; 95% CI: 0.01-0.10) and chest (score difference 0.21; 95% CI: 0.09-0.33) symptoms compared to the stack locations.

### Conclusions

1  
2  
3 There was no consistent evidence of adverse respiratory effects from short term exposures  
4  
5 downwind of the tunnel ventilation stack, except for dry nose symptoms. However, the  
6  
7 findings of increased airway inflammation and symptoms in subjects after only two hours  
8  
9 exposure at the heavily trafficked location, is suggestive of detrimental effects of short-term  
10  
11 exposures to traffic related air pollution.  
12  
13  
14  
15  
16  
17  
18  
19  
20  
21  
22  
23  
24  
25  
26  
27  
28  
29  
30  
31  
32  
33  
34  
35  
36  
37  
38  
39  
40  
41  
42  
43  
44  
45  
46  
47  
48  
49  
50  
51  
52  
53  
54  
55  
56  
57  
58  
59  
60

For peer review only

## ARTICLE SUMMARY

### Article focus

- Road tunnels are being increasingly commissioned in major cities around the world to alleviate traffic on surface roads.
- There is little existing data on the health impacts of exposure to tunnel emissions on surrounding communities.
- Our objective was to estimate the short-term respiratory health effects of exposure to emissions from a road tunnel ventilation stack.

### Key messages

- There was no consistent evidence of adverse respiratory effects of being located downwind of the tunnel ventilation stack, except for an increase in dry nose symptoms.
- Short term (two hour) exposures to a heavily trafficked control site were associated with increased airway inflammation, eye and chest symptoms.
- The findings suggest detrimental effects of short-term exposure to traffic related air pollution, but are not supportive of consistent adverse effects from short-term exposures downwind of the tunnel ventilation stacks.

### Strengths and limitations of this study

- Strengths of the study include: the randomised cross-over cohort design and blinding of participants; use of a heavily trafficked site as a positive control; the before/after nature of our study; the repeated measures within and across years; and the sensitivity analysis.
- A limitation of our study is the differential loss from the groups over time.

## FUNDING STATEMENT

The study was funded by the CRC for Asthma & Airways and the NSW Health Department.

## INTRODUCTION

Road tunnels are increasingly important components of urban infrastructure. However, few studies have investigated the adverse impacts of exposure to emissions from road tunnel portals or their ventilation stacks, or the beneficial effects of diverting traffic from surface roads into tunnels. This may be due to the difficulty in designing studies that distinguish between emissions from road tunnels and emissions from general surrounding traffic [1, 2]. Only one study has investigated the association between exposure to emissions from a road tunnel ventilation stack and health effects. That cross-sectional study found no evidence of increased respiratory or irritant symptoms in high exposure zones compared to low exposure zones [3].

Several recent studies have reported designs that may be helpful for assessing this type of exposure. Each has investigated the respiratory[4-8] or cardiovascular[9-13] effects of very short term exposures (typically two hours or less) to traffic related air pollution (TRAP) and diesel emissions in real-world settings. All are characterised by their quasi-experimental study design in which participants were taken to locations (busy traffic, inner city with diesel only, quiet park like) or underwent realistic commutes (in buses, cars or bicycling) where the investigators expected elevated exposures or contrasts in exposures to TRAP to occur.

However, these designs have not yet been applied to the assessment of new point sources, such as emissions from road tunnels and their ventilation stacks.

A proposal to build a new road tunnel in Sydney with emissions vented to the surface via ventilation stacks presented us with an opportunity to prospectively test the hypothesis that short-term exposure to emissions from the tunnel ventilation stacks has an adverse effect on respiratory health.

## METHODS

The study was conducted in Sydney, Australia between 2006 and 2008, and approved by the University of Sydney Human Research Ethics Committee (HREC) on 17 August, 2006.

### Study design & subjects

The study was a randomised, controlled cross-over trial. Thirty-six volunteers were recruited through a university, student and workplace networks, and the Woolcock Institute of Medical Research's (WIMR) Volunteer Database. Eligibility criteria included: non-smokers; ability to walk easily for 2 hours; able to participate in 2006 and 2007; sense of smell not compromised; and not pregnant.

Study participants were randomised into three equal-size groups, which defined the order of exposure in the cross-over study. Three exposure conditions were tested: "downwind" of the LCT western ventilation stack (putative adverse exposure); "upwind" of the stack (negative control); and a "heavily trafficked site" (positive control). The three exposures took place over six days in October-November in 2006, before the tunnel opened, and during the same months in 2007 and 2008, after the tunnel opened. Each exposure comprised two morning sessions during peak traffic periods (7am-9am) on two consecutive weekdays (Tuesdays and Wednesdays) (Figure 1). There was a six day washout period between exposure conditions. The order of group allocation to exposure type was the same each year, except in 2008 where order of testing for two groups was changed twice due to changing wind conditions.

### Exposure locations

The tunnel ventilation stacks are located at its eastern and western ends, respectively. As the eastern stack is located close to tunnel feeder roads, attribution of an effect solely due to the



1  
2  
3 stack would be difficult. Hence, we decided to conduct the study at sites located around the  
4  
5 western ventilation stack using predetermined walking routes (Figure 2). The heavily  
6  
7 trafficked (positive control) site was located alongside a major urban commuter road close to  
8  
9 Sydney's central business district and remote from the study area. The annual average daily  
10  
11 traffic volume at this site was 64,418 vehicles per day during 2005.[14]  
12  
13

14  
15  
16 We selected six sites in a 500-1000m circumference around the stack and two sites on either  
17  
18 side of the major commuter road. The stack sites were chosen based on the feasibility of  
19  
20 accommodating testing procedures and identification of 20 min walking routes, which were  
21  
22 all on quiet residential streets with low traffic volumes, and were not undulating. Participants  
23  
24 were asked to walk at a comfortable, even pace.  
25  
26  
27

28  
29 For each study day, two of the six stack sites were selected and defined as "upwind" or  
30  
31 "downwind" sites based on the wind direction recorded at 6am that morning.  
32  
33  
34  
35

### 36 **Baseline assessment**

37  
38 Prior to fieldwork we conducted spirometry, measured nitric oxide concentration in exhaled  
39  
40 breath (eNO) and performed allergen skin prick tests (SPT) on participants in the WIMR  
41  
42 laboratory. Participants completed a questionnaire recording asthma diagnosis, wheeze,  
43  
44 medication use, respiratory symptoms, and odour perception,[15-17] as experienced in the  
45  
46 preceding three months. Participants also completed a series of 14 visual analogue scales  
47  
48 (VAS) to rate their perception of respiratory and chest, nose, throat and eye symptoms. They  
49  
50 rated odour perception (strength and annoyance) on a VAS if they responded affirmatively to  
51  
52 detecting odour. Symptoms were ranked on VAS scales from "no symptoms" (0) to "the  
53  
54  
55  
56  
57  
58  
59  
60

1  
2  
3 worst I can imagine” (100). These data were used to determine pre-existing disease and to  
4  
5 characterise the study population.  
6  
7  
8

### 9 10 **Fieldwork**

11 Participants were either transported in a mini-van or made their own way to the field site.

12  
13 They were asked to wear N95 mask (Alpha Protech N95 particulate face mask certified to  
14  
15 NIOSH standards) from when they left home each morning until measurements were made,  
16  
17 to minimise exposure on route. They were asked to withhold long-acting bronchodilators for  
18  
19 12 hours and short-acting bronchodilators for 6 hours before fieldwork.  
20  
21  
22

23  
24  
25 Each exposure period commenced at 7am and lasted approximately two hours, incorporating  
26  
27 two 20 minute periods of walking and two rest periods (Figure 1). During each exposure,  
28  
29 subjects underwent three rounds of testing including completion of VAS forms, eNO  
30  
31 measurement and spirometry, in that order, and at timepoints as indicated in Figure 1.  
32  
33

34 Participants were allocated to pairs for testing and walking, with each pairing maintained (as  
35  
36 much as possible) throughout the three years of testing.  
37  
38  
39

### 40 *Clinical tests*

41  
42 We used a hand-held spirometer (QRS Diagnostic: Z-5000-2668) linked to Office Medic  
43  
44 software (Version 4.5i) to record forced expiratory volume in 1 second (FEV<sub>1</sub>), and forced  
45  
46 vital capacity (FVC). Spirometry was performed according to the American Thoracic  
47  
48 Society/European Respiratory Society (ATS/ERS) criteria with technically unsatisfactory  
49  
50 curves identified at the time of testing and again after fieldwork. These technically  
51  
52 unsatisfactory curves were excluded from analysis. To improve reliability of the measures we  
53  
54 chose the highest of two values reproducible within 150 ml for FEV<sub>1</sub> and FVC. Where not  
55  
56  
57  
58  
59  
60

1  
2  
3 reproducible, curves were rechecked for quality and, if acceptable, the highest measures for  
4  
5 FEV<sub>1</sub> and FVC were selected.  
6  
7

8  
9 We used an off-line technique to measure eNO, according to ATS/ERS criteria[18] at an  
10  
11 expiratory flow rate of 200 ml/sec[19]. Exhaled breath was collected into a 3L chemically  
12  
13 inert bag through a rotameter incorporating a filter and an NO scrubber on the inlet valve, to  
14  
15 exclude the influence of ambient NO levels on personal NO concentrations. The NO  
16  
17 concentration was measured within 24 hours of collection using a chemiluminescence  
18  
19 analyser (ThermoEnvironmental 42°C).  
20  
21  
22  
23

24  
25 Skin prick tests were performed using airborne allergens for house dust mites (D.  
26  
27 pteronyssinus, D. farinae), mould (Alternaria, Aspergillus), cat pelt, dog, cockroach, ryegrass,  
28  
29 and grass mix (Hollister-Stier).[20] Wheal sizes were measured as the average of the largest  
30  
31 diameter and its perpendicular at 15 minutes. Wheals larger than 3mm in diameter and larger  
32  
33 than the negative control were considered positive. Subjects with any positive skin prick test  
34  
35 were classified as atopic.  
36  
37  
38  
39

#### 40 *Air quality monitoring*

41  
42 Air quality monitoring took place on each field testing day at each visited site, constituting a  
43  
44 total of 18 measurement days. We collected samples for particulate matter (PM<sub>10</sub>, PM<sub>2.5</sub> and  
45  
46 PM<sub>1</sub>), volatile organic compounds (VOCS), total oxides of nitrogen (NO<sub>x</sub>), nitrogen dioxide  
47  
48 (NO<sub>2</sub>) and nitrogen oxide (NO).  
49  
50  
51  
52  
53  
54  
55  
56  
57  
58  
59  
60

1  
2  
3 We used Osiris instruments to collect PM data in 2006 and 2007 and Topas units for  
4 collection of PM data in 2008 due to the unavailability of Osiris instruments. Concentrations  
5 of PM data were recorded as 2 minute averages.  
6  
7  
8  
9

10  
11 VOC samples were collected using a stainless steel canister and inlet designed to collect an  
12 evenly spaced sample over the two hours of fieldwork, providing an average reading. The  
13 samples were analysed at the CSIRO Laboratory in 2006 and 2008 for 1,3-butadiene,  
14 benzene, toluene, ethylbenzene, *m*- + *p*-xylene, *o*-xylene. Samples were analysed by an  
15 alternative laboratory in 2007 but the limit of detection (DL) was higher and given that many  
16 of the readings were below this DL we excluded the 2007 data.  
17  
18  
19  
20  
21  
22  
23  
24  
25  
26

27 Samples for ambient NO<sub>x</sub>/NO<sub>2</sub> were collected via grab samples every 15 minutes at each site  
28 using identical collection bags as those used for eNO collection. These were analysed (within  
29 24 hours) as for eNO analysis.  
30  
31  
32  
33  
34  
35

36 We obtained continuously recorded data for 2006-2007 for NO<sub>2</sub>, PM<sub>10</sub>, PM<sub>2.5</sub> from two air  
37 quality monitors sited in elevated positions near the ventilation stacks and established by the  
38 tunnel proponents for statutory purposes.[21]  
39  
40  
41  
42  
43  
44

#### 45 **Wind direction**

46  
47 Wind direction for each field day was determined using meteorological forecasts from the  
48 Bureau of Meteorology and by releasing slightly buoyant balloons filled with a mixture of air  
49 and helium from an elevated location near the western stack.  
50  
51  
52  
53  
54  
55  
56  
57  
58  
59  
60

1  
2  
3 To validate our choice of testing sites, wind speed and direction data were obtained from  
4  
5 three air quality monitoring stations located near the western ventilation stack, including the  
6  
7 elevated site mentioned above. The other two were ground level stations, operated for all  
8  
9 three study years. We constructed wind roses for the three monitoring sites using Lakes  
10  
11 Environmental WRPlot View (version 6.5.1).  
12  
13

14  
15  
16 Post-hoc validation of assignment of downwind and upwind study sites for each testing day  
17  
18 was checked using wind rose data. Where the chosen locations were within  $\pm 45$  degrees of  
19  
20 the measured downwind or upwind direction, they were deemed to be accurate downwind or  
21  
22 upwind locations, respectively. This validation was used in the sensitivity analysis. Data for  
23  
24 the heavily trafficked site (north or south side of the road) were included in the sensitivity  
25  
26 analysis in the same way. Data were also excluded where wind speed was  $<1$ m/sec.  
27  
28  
29  
30  
31

## 32 **Analysis**

### 33 *Health outcomes*

34  
35 The distributions of eNO were skewed and so these values were log-transformed. All other  
36  
37 dependent variables were analysed without transformation.  
38  
39  
40  
41  
42

43 Principal components analysis (PCA) was conducted to reduce the 14 symptom scores to five  
44  
45 factors which were found to explain 77% of the overall variance. The scree plot suggested  
46  
47 that this was the optimum number of factors. Hence, a five factor structure was fitted with  
48  
49 varimax rotation using data for all three years. The five factor scores were output for each  
50  
51 observation and these were used as continuous measures of symptom intensity. The five  
52  
53 symptom factors were 1) itchy/dry/sore eyes and blocked nose (EYE); 2) sore/dry throat, sore  
54  
55 chest and runny nose (THROAT); 3) chest tightness, difficulty breathing (CHEST); 4)  
56  
57  
58  
59  
60

1  
2  
3 sneezing, cough, watery eyes; (SNEEZE) and, 5) dry nose symptoms (DRY NOSE). The  
4  
5 distributions of VAS scores for “strong smell” and “annoying smell” were highly skewed and  
6  
7 included a large proportion of zero values, and so were treated as binary outcomes: zero  
8  
9 (“no”) and greater than zero (“yes”).  
10

11  
12  
13  
14 To estimate the air pollutant means we first calculated the daily means for each pollutant, and  
15  
16 then calculated the mean pollutant level by location and year.  
17  
18

19  
20  
21 We analysed the data using an ‘intention to treat’ approach, based on the locations chosen for  
22  
23 each group for each field testing session. Data for timepoint\_0 were excluded from the main  
24  
25 analyses based on the assumption that exposure had not started when that measurement was  
26  
27 made. We used a mixed effects linear regression model in which the fixed effects were  
28  
29 location (upwind, downwind, control) and year (2006, 2007, 2008), and used contrast  
30  
31 statements to test specific interactions between them. We also used contrast statements to  
32  
33 estimate the overall difference (averaged over all years) in effect between the heavily  
34  
35 trafficked location and the upwind and downwind locations combined. Since we expected  
36  
37 that health outcomes would be worse at the heavily trafficked site, this served as a validation  
38  
39 of the design. We included a random intercept term for subjects, with a variance components  
40  
41 covariance structure, to account for repeated measures within subjects. Spirometric outcomes,  
42  
43 eNO and the five symptom factors were separately included as outcome variables.  
44  
45

46  
47 Significance of the fixed effects was tested using F tests. Least squares means were estimated  
48  
49 for each combination of year and location. Analyses were conducted using SAS Version 9.2  
50  
51 PROC MIXED procedures.  
52  
53  
54  
55  
56  
57  
58  
59  
60

1  
2  
3 The binary variables “strong smell” and “annoying smell” were treated identically except that  
4  
5 a generalised linear mixed model was fitted with Proc GLIMMIX using the adaptive  
6  
7 quadrature estimation method, a logistic link and a binomial error distribution in SAS version  
8  
9 9.2.  
10

### 11 12 13 14 *Air pollutant concentrations*

15  
16 We used a similar mixed effects linear regression model with contrast statements, to test the  
17  
18 effects of location and year, and their interaction, on air pollutant measurements (NO<sub>x</sub>, NO<sub>2</sub>,  
19  
20 PM<sub>10</sub>, PM<sub>2.5</sub>, and PM<sub>1</sub>), excluding VOCs where there were too few readings. A random  
21  
22 intercept term for days was used to account for repeated measures. We conducted a  
23  
24 sensitivity analysis for the air quality data by re-fitting the models using data that were  
25  
26 validated using the wind-rose method, as described earlier.  
27  
28  
29  
30  
31

32 For the elevated monitor data, we used an autoregressive error model with Yule-Walker  
33  
34 estimates and stepwise regression to determine whether there was a difference in air quality  
35  
36 between 2006 (pre tunnel) and 2007 (post-tunnel opening), by comparing daily averages for  
37  
38 the two years. We adjusted this analysis for changes in regional air quality measured at three  
39  
40 regulatory monitoring stations operated by the Department of Environment, Climate Change  
41  
42 and Water (DECCW), including as a covariate the change in average daily readings from the  
43  
44 DECCW sites combined. We tested up to 20 lags, residuals were plotted to check for  
45  
46 normality, and the autocorrelation function (ACF) and partial autocorrelation function  
47  
48 (PACF) were checked for autocorrelation. These models were implemented in SAS 9.2 using  
49  
50 the AUTOREG procedure.  
51  
52  
53  
54  
55

### 56 **Sample size and power calculation**

57  
58  
59  
60

1  
2  
3 The sample size for this study (36 subjects) was selected by reference to a study conducted in  
4  
5 London that was able to detect significant within-subject differences in lung function in 60  
6  
7 subjects exposed to a high pollution area and a low pollution area [5], noting that our study  
8  
9 had a greater number of repeated measures.  
10

## 11 12 13 14 **RESULTS**

15  
16 In 2006, 25% of the 36 participants reported having had a diagnosis of asthma and 42%  
17  
18 reported having had wheeze, including 25% who had wheeze in the last three months (Table  
19  
20 1). The majority of participants were atopic. Of the 36 subjects who started the study in 2006,  
21  
22 26 (72%) participated in 2007 and 20 (56%) in 2008. Whilst the cohort characteristics  
23  
24 remained relatively stable between 2006 and 2007, in 2008 the remaining cohort was less  
25  
26 symptomatic in the three months prior to 2008 field testing (Table 1, Supplementary  
27  
28 Material).  
29  
30  
31  
32  
33

### 34 **Health Outcomes**

35  
36  
37 FEV<sub>1</sub> and FVC were similar across locations, but were generally higher in 2006 compared to  
38  
39 2007 or 2008 (Table 2). Mean values for eNO were highest at the heavily trafficked (positive  
40  
41 control) location for all years except for 2008 and did not differ between the downwind and  
42  
43 upwind locations. EYE, THROAT and CHEST symptom scores were highest at the heavily  
44  
45 trafficked location compared to the downwind or upwind locations during all years, with one  
46  
47 exception (Table 2).  
48  
49  
50  
51  
52

53  
54 There was little evidence that the downwind locations, when compared with the heavily  
55  
56 trafficked or upwind locations, were associated with adverse health outcomes in 2007 or  
57  
58  
59  
60



2008, compared to 2006 (Table 3). The only exception was that changes in DRY NOSE scores were higher for downwind vs heavily trafficked locations. Downwind locations were associated with a decrease in reporting of chest symptoms for almost all year comparisons.

**Table 1. Baseline characteristics as measured at recruitment in 2006**

| Symptom/characteristic                                        | N (%)       |
|---------------------------------------------------------------|-------------|
| Total number of subjects                                      | 36 (100)    |
| Asthma (ever diagnosis)                                       | 9 (25)      |
| Ever wheezed                                                  | 15 (42)     |
| Wheeze (in last 3 mths)                                       | 9 (25)      |
| Breathless (in last 3 mths)                                   | 4 (11)      |
| Cough (in last 3 mths)                                        | 20 (56)     |
| Activities limited (in last 3 mths)                           | 3 (8)       |
| Ever taken asthma medication                                  | 15 (42)     |
| Asthma medication (in last 3 mths)                            | 8 (22)      |
| Inhaled steroids (in last 3 mths) <sup>a</sup>                | 6 (17)      |
| Sensitive eyes <sup>b</sup>                                   | 12 (33)     |
| Eye symptoms (in last 3 mths without a cold/flu) <sup>c</sup> | 14 (39)     |
| Nose symptoms (in last 3 mths without a cold/flu)             | 18 (50)     |
| Throat symptoms (in last 3 mths without a cold/flu)           | 10 (28)     |
| Mouth symptoms (in last 3 mths (soreness of gums or teeth))   | 13 (36)     |
| Atopic <sup>d</sup>                                           | 26 (72)     |
| Female                                                        | 25 (69)     |
| <hr/>                                                         |             |
| Spirometry & chemical sensitivity score                       | Mean (SD)   |
| FEV <sub>1</sub> (L)                                          | 2.99 (0.94) |
| FVC (L)                                                       | 3.78 (1.11) |
| eNO (ppb)                                                     | 11.1 (12.1) |
| Chemical sensitivity scale score (CSS)[17]                    | 36.3 (8.7)  |

<sup>a</sup> Inhaled steroids=having taken either seretide or pulmicort

<sup>b</sup> Question: Do you usually regard your eyes as being sensitive to cigarette smoke, smog, air conditioning or central heating?

<sup>c</sup> Question: Have you had any of the following eye symptoms in the last 3 mths, when you did not have a cold or flu (eye redness, burning feeling, scratchiness, grittiness, dryness, watery eyes)?

<sup>d</sup> Any allergen SPT  $\geq$  3mm

1  
2  
3  
4  
5  
6  
7  
8  
9  
10  
11  
12  
13  
14  
15  
16  
17  
18  
19  
20  
21  
22  
23  
24  
25  
26  
27  
28  
29  
30  
31  
32  
33  
34  
35  
36  
37  
38  
39  
40  
41  
42  
43  
44  
45  
46  
47  
48  
49  
50  
51  
52  
53  
54  
55  
56  
57  
58  
59  
60

For peer review only

Table 2. Mean values for lung function and symptom scores by location and year

| Location                  | Year           | FEV <sub>1</sub> (L) | FVC (L) | eNO (ppb) (median) | EYE symptoms score* | THROAT symptoms score* | CHEST symptoms score* | SNEEZE symptoms score* | DRY NOSE symptoms score* |
|---------------------------|----------------|----------------------|---------|--------------------|---------------------|------------------------|-----------------------|------------------------|--------------------------|
| <b>Heavily trafficked</b> | <b>Average</b> | 2.77                 | 3.71    | 13.6               | 0.086               | 0.030                  | 0.149                 | 0.393                  | -0.047                   |
|                           | <b>2006</b>    | 2.82                 | 3.72    | 11.6               | 0.076               | 0.162                  | 0.097                 | 0.007                  | 0.219                    |
|                           | <b>2007</b>    | 2.76                 | 3.70    | 20.9               | 0.095               | 0.057                  | 0.100                 | 0.567                  | -0.224                   |
|                           | <b>2008</b>    | 2.71                 | 3.70    | 11.1               | 0.095               | -0.215                 | 0.280                 | 0.845                  | -0.300                   |
| <b>Downwind</b>           | <b>Average</b> | 2.78                 | 3.73    | 12.1               | 0.046               | -0.055                 | -0.032                | 0.387                  | -0.158                   |
|                           | <b>2006</b>    | 2.83                 | 3.74    | 10.2               | 0.017               | -0.016                 | 0.001                 | -0.076                 | -0.094                   |
|                           | <b>2007</b>    | 2.78                 | 3.75    | 17.8               | 0.035               | -0.037                 | -0.086                | 0.813                  | -0.089                   |
|                           | <b>2008</b>    | 2.70                 | 3.69    | 10.6               | 0.104               | -0.137                 | -0.027                | 0.712                  | -0.336                   |
| <b>Upwind</b>             | <b>Average</b> | 2.79                 | 3.75    | 12.8               | 0.007               | -0.144                 | -0.073                | 0.118                  | -0.030                   |
|                           | <b>2006</b>    | 2.85                 | 3.80    | 10.9               | -0.047              | -0.059                 | -0.046                | -0.109                 | 0.138                    |
|                           | <b>2007</b>    | 2.76                 | 3.74    | 18.2               | 0.078               | -0.066                 | -0.169                | 0.347                  | -0.042                   |
|                           | <b>2008</b>    | 2.73                 | 3.69    | 11.3               | 0.024               | -0.358                 | -0.019                | 0.258                  | -0.294                   |

EYE symptoms: Itchy/dry/sore eyes and blocked nose

THROAT symptoms: Sore/dry throat, sore chest & runny nose

CHEST symptoms: Chest tightness, difficulty breathing

SNEEZE symptoms: Sneezing, cough, watery eyes

DRY NOSE symptoms: Dry nose

1  
2  
3  
4  
5  
6  
7  
8  
9  
10  
11  
12  
13  
14  
15  
16  
17  
18  
19  
20  
21  
22  
23  
24  
25  
26  
27  
28  
29  
30  
31  
32  
33  
34  
35  
36  
37  
38  
39  
40  
41  
42  
43  
44  
45  
46  
47  
48  
49

**Table 3. Contrasts\* in lung function, eNO and symptom scores between the downwind site and the other two sites (upwind and Heavily trafficked) adjusted for change from baseline (2006) to subsequent years**

| Contrast <sup>a</sup>                                    |                              | FEV1<br>(diff in litres)<br>(95% CI) | FVC<br>(diff in litres)<br>(95% CI) | eNO<br>Ratio<br>(95% CI) | EYE symptoms<br>(diff in score)<br>(95% CI) | THROAT symptoms<br>(diff in score)<br>(95% CI) |
|----------------------------------------------------------|------------------------------|--------------------------------------|-------------------------------------|--------------------------|---------------------------------------------|------------------------------------------------|
| Location                                                 | Year                         |                                      |                                     |                          |                                             |                                                |
| Downwind vs (Heavily trafficked and Upwind) <sup>b</sup> | 2007/08 vs 2006 <sup>c</sup> | 0.01 (-0.04-0.06)                    | 0.03 (-0.03-0.09)                   | 1.03 (0.94-1.12)         | -0.006 (-0.097-0.086)                       | 0.130 (-0.084-0.344)                           |
|                                                          | 2007 vs 2006                 | 0.03 (-0.03-0.09)                    | 0.05 (-0.03-0.13)                   | 1.01 (0.91-1.11)         | -0.055 (-0.159-0.049)                       | 0.041 (-0.220-0.301)                           |
|                                                          | 2008 vs 2006                 | -0.004 (-0.07-0.06)                  | 0.02 (-0.07-0.10)                   | 1.05 (0.94-1.17)         | 0.043 (-0.074-0.159)                        | 0.207 (-0.027-0.441)                           |
| Downwind vs Upwind                                       | 2007/08 vs 2006 <sup>c</sup> | 0.02 (-0.04-0.08)                    | 0.06 (-0.02-0.13)                   | 1.03 (0.93-1.14)         | -0.044 (-0.151-0.063)                       | 0.080 (-0.169-0.329)                           |
|                                                          | 2007 vs 2006                 | 0.04 (-0.03-0.11)                    | 0.06 (-0.03-0.15)                   | 1.05 (0.94-1.17)         | -0.108 (-0.229-0.012)                       | -0.006 (-0.308-0.297)                          |
|                                                          | 2008 vs 2006                 | 0.004 (-0.07-0.08)                   | 0.06 (-0.04-0.15)                   | 1.01 (0.89-1.15)         | 0.015 (-0.120-0.149)                        | 0.179 (-0.092-0.449)                           |
| Downwind vs Heavily trafficked                           | 2007/08 vs 2006 <sup>c</sup> | -0.00 (-0.06-0.06)                   | 0.004 (-0.07-0.08)                  | 1.03 (0.93-1.14)         | 0.033 (-0.073-0.140)                        | 0.180 (-0.068-0.428)                           |
|                                                          | 2007 vs 2006                 | 0.02 (-0.05-0.09)                    | 0.04 (-0.05-0.12)                   | 0.97 (0.87-1.08)         | -0.002 (-0.121-0.117)                       | 0.087 (-0.212-0.385)                           |
|                                                          | 2008 vs 2006                 | -0.01 (-0.09-0.06)                   | -0.03 (-0.12-0.07)                  | 1.09 (0.96-1.23)         | 0.071 (-0.065-0.206)                        | 0.236 (-0.038-0.509)                           |
| Heavily trafficked vs (Upwind and Downwind) <sup>d</sup> | Overall                      | -0.01 (-0.04-0.01)                   | -0.03 (-0.06-0.002)                 | 1.09 (1.04-1.14)         | 0.054 (0.006-0.102)                         | 0.107 (-0.005-0.218)                           |

| Contrast <sup>a</sup>                                          |                              | CHEST symptoms              | SNEEZE symptoms             | DRY NOSE symptoms           | SMELL-STRONG           | SMELL-ANNOYING         |
|----------------------------------------------------------------|------------------------------|-----------------------------|-----------------------------|-----------------------------|------------------------|------------------------|
| Location                                                       | Year                         | (diff in score)<br>(95% CI) | (diff in score)<br>(95% CI) | (diff in score)<br>(95% CI) | Odds ratio<br>(95% CI) | Odds ratio<br>(95% CI) |
| Downwind vs<br>(Heavily trafficked and<br>Upwind) <sup>b</sup> | 2007/08 vs 2006 <sup>c</sup> | -0.080 (-0.302-0.142)       | 0.288 (-0.139-0.716)        | 0.276 (0.040-0.511)         | 3.45 (1.57-7.60)       | 1.69 (0.72-3.96)       |
|                                                                | 2007 vs 2006                 | -0.031 (-0.277-0.214)       | 0.375 (-0.093-0.844)        | 0.320 (0.053-0.587)         | 5.72 (2.35-13.91)      | 1.95 (0.77-4.94)       |
|                                                                | 2008 vs 2006                 | -0.133 (-0.409-0.143)       | 0.182 (-0.254-0.618)        | 0.229 (-0.057-0.516)        | 2.14 (0.77-5.97)       | 1.33 (0.44-4.00)       |
| Downwind vs Upwind                                             | 2007/08 vs 2006 <sup>c</sup> | -0.017 (-0.275-0.242)       | 0.430 (-0.067-0.927)        | 0.193 (-0.081-0.466)        | 3.51 (1.40-8.80)       | 1.23 (0.45-3.40)       |
|                                                                | 2007 vs 2006                 | 0.033 (-0.252-0.318)        | 0.422 (-0.123-0.966)        | 0.187 (-0.124-0.498)        | 4.11 (1.48-11.43)      | 1.12 (0.38-3.37)       |
|                                                                | 2008 vs 2006                 | -0.042 (-0.362-0.277)       | 0.424 (-0.080-0.929)        | 0.178 (-0.154-0.510)        | 3.31 (0.98-11.18)      | 1.26 (0.34-4.71)       |
| Downwind vs Heavily<br>trafficked                              | 2007/08 vs 2006 <sup>c</sup> | -0.143 (-0.400-0.114)       | 0.147 (-0.349-0.642)        | 0.358 (0.086-0.631)         | 3.39 (1.39-8.29)       | 2.31 (0.90-5.94)       |
|                                                                | 2007 vs 2006                 | -0.096 (-0.377-0.185)       | 0.329 (-0.208-0.866)        | 0.453 (0.146-0.759)         | 7.96 (2.89-21.93)      | 3.38 (1.20-9.54)       |
|                                                                | 2008 vs 2006                 | -0.224 (-0.547-0.099)       | -0.060 (-0.570-0.450)       | 0.281 (-0.054-0.617)        | 1.38 (0.44-4.40)       | 1.40 (0.41-4.75)       |
| Heavily trafficked vs<br>(Upwind and<br>Downwind) <sup>d</sup> | Overall                      | 0.209 (0.094-0.325)         | 0.150 (-0.072-0.372)        | 0.022 (-0.101-0.144)        | 2.34 (1.58-3.49)       | 4.08 (2.67-6.25)       |

<sup>a</sup> Contrasts are derived from mixed effects regression model in which location and year, and the interaction between them are fixed effects, and individual subject intercepts are a random effect. Main contrasts of interest are those included in the table and consist of downwind versus other exposures, as the downwind exposure is the primary exposure of interest in this study.

<sup>b</sup> Downwind vs (heavily trafficked and upwind) is the comparison of downwind versus heavily trafficked and upwind exposures combined.

<sup>c</sup> 2007/08 vs 2006 represents the comparison of both post-tunnel years combined (2007/08) versus the pre-tunnel year (2006).

<sup>d</sup> Represents the overall comparison of the heavily trafficked site compared to the upwind and downwind sites combined (data from all years included), as we anticipated the heavily trafficked site to have higher air pollution levels and that health effects would be more prominent.

1  
2  
3  
4 Over the three year period as a whole, exposure at the heavily trafficked locations, compared with  
5  
6 both the downwind and upwind stack locations, was associated with more airway  
7  
8 inflammation (eNO) (ratio=1.09), and higher scores for EYE, CHEST, and THROAT symptoms  
9  
10 (last row, Table 3). These findings support the validity of the study design and analysis.  
11  
12

13  
14  
15 The change in “smell\_strong” from 2006 to subsequent years was higher for downwind locations  
16  
17 than the other two locations (Table 3). However, in general this pattern was not observed for  
18  
19 “smell-annoying”. Overall, both “smell-strong” and “smell-annoying” were higher at the heavily  
20  
21 trafficked locations than the two stack locations (last row, Table 3).  
22  
23

#### 24 25 26 *Sensitivity analysis for health outcomes* 27

28 In the sensitivity analysis we excluded data which might have led to exposure misclassification  
29  
30 due to unexpected wind direction, as described earlier. Data for: 5 “downwind” sites in 2006 and  
31  
32 2 in 2008; for 2 “upwind” sites in 2006 and 2 in 2008; and for one heavily trafficked site in 2006;  
33  
34 were excluded.  
35  
36

37  
38  
39 In this analysis FVC was increased for downwind locations vs the other two locations, for most  
40  
41 year comparisons (Table 2, Supplementary Material). FEV<sub>1</sub> was also increased for downwind vs  
42  
43 heavily trafficked locations. Conversely, eNO was higher at downwind compared to upwind  
44  
45 locations for 2007 vs 2006. The increased odds of “smell-strong” at downwind locations did not  
46  
47 differ to the other locations in the sensitivity analysis. Overall, eNO levels, CHEST symptoms,  
48  
49 “smell-strong” and “smell-annoying” were higher at the heavily trafficked locations compared to  
50  
51 upwind or downwind locations, confirming the findings of the intention-to-treat analysis (Table  
52  
53 2, Supplementary Material).  
54  
55  
56  
57  
58  
59  
60

### Air pollutant levels

As expected, the concentrations of all pollutants were higher at the heavily trafficked sites than the upwind or downwind sites. However, there was little difference in mean pollutant levels between the downwind and upwind locations around the ventilation stack (Table 4 and Table 3, Supplementary Material). NO<sub>x</sub> and NO<sub>2</sub> ratios were lower for the downwind sites than the other two sites for 2007 vs 2006. In contrast, the NO<sub>2</sub> ratio for 2008 vs 2006 was higher at the downwind sites than at the heavily trafficked sites (Table 5). The change in PM (for all size fractions) from 2006 to subsequent years did not vary by site. Overall, the change in pollutants was greatest at the heavily trafficked sites compared to the upwind and downwind sites combined.

In the sensitivity analysis the pollutant ratios for downwind locations compared to upwind locations increased for most pollutants supporting the validity of the exclusion criteria (Table 4, Supplementary Material).

NO<sub>2</sub> and PM<sub>10</sub> decreased at the western and eastern elevated monitoring sites between 2006 and 2007, after adjusting for changes in regional air quality (Table 6).

Table 4. Mean pollutant levels by location (2006-2008 overall)

| Pollutant                                    | Location           | Sample days | Samples | Mean <sup>a</sup> | Median <sup>a</sup> | IQR        | Min  | Max   |
|----------------------------------------------|--------------------|-------------|---------|-------------------|---------------------|------------|------|-------|
| <b><u>Nitrogen oxides</u><sup>b</sup></b>    |                    |             |         |                   |                     |            |      |       |
| <b>NO<sub>x</sub></b>                        | Heavily trafficked | 18          | 157     | 126.2             | 95.2                | 28.1-133.1 | 7.9  | 650.7 |
|                                              | Downwind           | 18          | 159     | 23.9              | 16.2                | 8.0-38.5   | 3.5  | 66.3  |
|                                              | Upwind             | 18          | 150     | 26.2              | 15.8                | 8.6-32.8   | 3.6  | 84.4  |
| <b>NO<sub>2</sub></b>                        | Heavily trafficked | 18          | 160     | 6.1               | 3.8                 | 1.2-5.7    | -2.3 | 27.8  |
|                                              | Downwind           | 18          | 159     | 3.1               | 2.3                 | 1.2-4.2    | 0.8  | 9.4   |
|                                              | Upwind             | 18          | 151     | 3.1               | 1.8                 | 1.4-4.5    | 0.6  | 10.4  |
| <b><u>Particulate matter</u><sup>c</sup></b> |                    |             |         |                   |                     |            |      |       |
| <b>PM<sub>10</sub></b>                       | Heavily trafficked | 17          | 1034    | 52.6              | 45.1                | 35.4-64.2  | 28.3 | 108.5 |
|                                              | Downwind           | 17          | 1099    | 41.9              | 33.5                | 29.7-49.9  | 17.1 | 90.4  |
|                                              | Upwind             | 17          | 1087    | 45.9              | 35.2                | 25.4-49.5  | 16.7 | 132.8 |
| <b>PM<sub>2.5</sub></b>                      | Heavily trafficked | 17          | 1034    | 13.0              | 13.9                | 9.6-16.5   | 4.2  | 20.0  |
|                                              | Downwind           | 17          | 1099    | 11.0              | 10.4                | 7.9-13.5   | 1.5  | 19.7  |
|                                              | Upwind             | 17          | 1087    | 11.7              | 10.6                | 9.2-13.4   | 1.7  | 28.5  |
| <b>PM<sub>1</sub></b>                        | Heavily trafficked | 17          | 1034    | 2.4               | 2.5                 | 1.9-3.0    | 1.1  | 3.4   |
|                                              | Downwind           | 17          | 1099    | 1.9               | 1.9                 | 1.5-2.3    | 0.3  | 3.2   |
|                                              | Upwind             | 17          | 1087    | 2.0               | 2.0                 | 1.5-2.4    | 0.5  | 5.1   |
| <b><u>VOCs</u><sup>d</sup></b>               |                    |             |         |                   |                     |            |      |       |
| <b>Benzene</b>                               | Heavily trafficked | 12          | 12      | 0.86              | 0.86                | 0.44-1.07  | 0.35 | 1.7   |
|                                              | Downwind           | 12          | 12      | 0.39              | 0.37                | 0.18-0.55  | 0.16 | 0.75  |
|                                              | Upwind             | 12          | 12      | 0.37              | 0.27                | 0.23-0.49  | 0.13 | 0.87  |
| <b>Butadiene</b>                             | Heavily trafficked | 12          | 12      | 0.25              | 0.25                | 0.11-0.33  | 0.04 | 0.59  |
|                                              | Downwind           | 12          | 12      | 0.11              | 0.11                | 0.04-0.18  | 0.04 | 0.24  |
|                                              | Upwind             | 12          | 12      | 0.11              | 0.09                | 0.07-0.16  | 0.04 | 0.30  |
| <b>Toluene</b>                               | Heavily trafficked | 10          | 10      | 5.25              | 4.60                | 2.60-6.80  | 1.50 | 10.80 |
|                                              | Downwind           | 10          | 10      | 2.61              | 2.55                | 2.20-3.00  | 1.40 | 3.90  |
|                                              | Upwind             | 10          | 10      | 3.58              | 3.55                | 2.30-4.00  | 1.20 | 7.00  |
| <b>Ethylbenzene</b>                          | Heavily trafficked | 12          | 12      | 0.66              | 0.59                | 0.29-1.02  | 0.15 | 1.70  |
|                                              | Downwind           | 12          | 12      | 0.45              | 0.38                | 0.21-0.60  | 0.09 | 1.50  |
|                                              | Upwind             | 12          | 12      | 0.51              | 0.36                | 0.22-0.46  | 0.09 | 1.90  |



| Pollutant        | Location           | Sample days | Samples | Mean <sup>a</sup> | Median <sup>a</sup> | IQR       | Min  | Max  |
|------------------|--------------------|-------------|---------|-------------------|---------------------|-----------|------|------|
| <b>mp-xylene</b> | Heavily trafficked | 12          | 12      | 2.43              | 1.70                | 0.81-3.31 | 0.55 | 7.70 |
|                  | Downwind           | 12          | 12      | 1.25              | 1.35                | 0.49-1.70 | 0.28 | 2.80 |
|                  | Upwind             | 12          | 12      | 1.22              | 0.88                | 0.46-1.60 | 0.30 | 4.00 |
| <b>o-xylene</b>  | Heavily trafficked | 12          | 12      | 0.90              | 0.70                | 0.34-1.23 | 0.22 | 2.70 |
|                  | Downwind           | 12          | 12      | 0.50              | 0.52                | 0.19-0.77 | 0.13 | 1.10 |
|                  | Upwind             | 12          | 12      | 0.49              | 0.37                | 0.21-0.64 | 0.10 | 1.60 |

<sup>a</sup> Means and medians calculated by taking the mean of daily averages at each site. IQR, minimum and maximum values using all (not averaged) data.

<sup>b</sup> Grab sample for NO<sub>2</sub> and NO<sub>x</sub> collected at each site every 15 min and averaged per two hr exposure period.

<sup>c</sup> PM data collected every two min.

<sup>d</sup> One sample collected at site providing an average VOC reading per two hr exposure period. 2007 data not used in analysis due to different detection limits used by different laboratory. 95<sup>th</sup> percentile not reported for VOCs as sample size too small; 95<sup>th</sup> percentile equivalent to maximum reading.

1  
2  
3  
4  
5  
6  
7  
8  
9  
10  
11  
12  
13  
14  
15  
16  
17  
18  
19  
20  
21  
22  
23  
24  
25  
26  
27  
28  
29  
30  
31  
32  
33  
34  
35  
36  
37  
38  
39  
40  
41  
42  
43  
44  
45  
46  
47  
48  
49

**Table 5. Ratios of pollutant levels<sup>a</sup> contrasting the downwind site and the other two sites (upwind and heavily trafficked) adjusted for change from baseline (2006) to subsequent years**

| Contrast                                                 |                             | NO <sub>x</sub> ratio<br>(95% CI) | NO <sub>2</sub> ratio<br>(95% CI) | PM <sub>10</sub> ratio<br>(95% CI) | PM <sub>2.5</sub> ratio<br>(95% CI) | PM <sub>1</sub> ratio<br>(95% CI) |
|----------------------------------------------------------|-----------------------------|-----------------------------------|-----------------------------------|------------------------------------|-------------------------------------|-----------------------------------|
| Location                                                 | Year                        |                                   |                                   |                                    |                                     |                                   |
| Downwind vs (Heavily trafficked and Upwind) <sup>b</sup> | 2007/8 vs 2006 <sup>c</sup> | 0.78 (0.61-0.99)                  | 0.77 (0.59-1.00)                  | 1.10 (0.66-1.81)                   | 1.09 (0.55-2.16)                    | 1.06 (0.58-1.93)                  |
|                                                          | 2007 vs 2006                | 0.59 (0.44-0.80)                  | 0.49 (0.38-0.63)                  | 1.18 (0.61-2.28)                   | 1.04 (0.42-2.58)                    | 0.98 (0.44-2.17)                  |
|                                                          | 2008 vs 2006                | 1.02 (0.77-1.35)                  | 1.20 (0.88-1.64)                  | 1.02 (0.56-1.85)                   | 1.14 (0.67-1.94)                    | 1.14 (0.70-1.87)                  |
| Downwind vs Upwind                                       | 2007/8 vs 2006 <sup>c</sup> | 0.84 (0.64-1.12)                  | 0.63 (0.46-0.86)                  | 1.16 (0.65-2.07)                   | 1.10 (0.50-2.41)                    | 1.04 (0.52-2.07)                  |
|                                                          | 2007 vs 2006                | 0.72 (0.51-1.02)                  | 0.52 (0.39-0.71)                  | 1.16 (0.54-2.48)                   | 1.09 (0.38-3.09)                    | 1.02 (0.41-2.55)                  |
|                                                          | 2008 vs 2006                | 0.99 (0.71-1.37)                  | 0.76 (0.53-1.09)                  | 1.16 (0.58-2.30)                   | 1.11 (0.60-2.04)                    | 1.06 (0.60-1.87)                  |
| Downwind vs Heavily trafficked                           | 2007/8 vs 2006 <sup>c</sup> | 0.72 (0.55-0.94)                  | 0.93 (0.68-1.27)                  | 1.04 (0.58-1.86)                   | 1.09 (0.50-2.39)                    | 1.08 (0.54-2.16)                  |
|                                                          | 2007 vs 2006                | 0.49 (0.35-0.69)                  | 0.46 (0.34-0.61)                  | 1.20 (0.56-2.57)                   | 1.00 (0.35-2.85)                    | 0.94 (0.38-2.36)                  |
|                                                          | 2008 vs 2006                | 1.05 (0.76-1.45)                  | 1.90 (1.33-2.72)                  | 0.89 (0.45-1.78)                   | 1.18 (0.64-2.18)                    | 1.24 (0.70-2.19)                  |
| Heavily trafficked vs (Upwind and Downwind) <sup>d</sup> | Overall                     | 4.08 (3.64-4.57)                  | 1.45 (1.28-1.65)                  | 1.27 (1.00-1.62)                   | 1.21 (0.87-1.68)                    | 1.31 (0.99-1.75)                  |

<sup>a</sup> Ratios are derived from a mixed effects regression model in which location and year, and the interaction between them are fixed effects, and individual subject intercepts are a random effect. Main contrasts of interest are those included in the table and consist of downwind versus other exposures, as the downwind exposure is the primary exposure of interest in this study.

<sup>b</sup> Downwind vs (heavily trafficked and upwind) is the comparison of downwind versus heavily trafficked and upwind exposures combined.

<sup>c</sup> 2007/08 vs 2006 represents the comparison of both post-tunnel years combined (2007/08) versus the pre-tunnel year (2006).

<sup>d</sup> Represents the overall comparison of the heavily trafficked site compared to the two stack sites (downwind and upwind) combined, (data from all years included).

**Table 6. Mean pollutant concentrations for elevated monitors by year and difference in pollutant concentration from post-tunnel year compared to pre-tunnel year**

| Site & pollutant                                    | Mean pollutant levels (SD) |             | Difference in pollutant levels<br>2007 vs 2006 <sup>a</sup> |                                            |
|-----------------------------------------------------|----------------------------|-------------|-------------------------------------------------------------|--------------------------------------------|
|                                                     | 2006                       | 2007        | Unadjusted estimate<br>(95% CI)                             | Adjusted estimate<br>(95% CI) <sup>b</sup> |
| <i>Elevated site near western ventilation stack</i> |                            |             |                                                             |                                            |
| NO <sub>2</sub> ppb                                 | 13.4 (5.6)                 | 12.1 (4.5)  | -1.93 (-3.06, -0.80)                                        | -1.06 (-1.67, -0.44)                       |
| NO <sub>x</sub> ppb                                 | 26.1 (19.9)                | 20.6 (14.6) | -5.97 (-11.20, -0.74)                                       | -2.74 (-4.42 to -1.06)                     |
| PM <sub>10</sub> µg/m <sup>3</sup>                  | 18.7 (7.4)                 | 16.2 (7.0)  | -2.40 (-4.23, -0.57)                                        | -0.45 (-1.95, 1.04)                        |
| PM <sub>2.5</sub> µg/m <sup>3</sup>                 | 6.2 (3.5)                  | 5.3 (3.3)   | -1.01 (-2.27, 0.25)                                         | -0.20 (-0.66, 0.27)                        |
| <i>Elevated site near eastern ventilation stack</i> |                            |             |                                                             |                                            |
| NO <sub>2</sub> ppb                                 | 16.7 (7.0)                 | 15.7 (5.3)  | -2.50 (-4.41, -0.60)                                        | -0.99 (-2.21, 0.23)                        |
| NO <sub>x</sub> ppb                                 | 30.7 (17.8)                | 27.1 (14.1) | -6.28 (-10.93, -1.62)                                       | -2.05 (-2.91, -1.20)                       |
| PM <sub>10</sub> µg/m <sup>3</sup>                  | 20.2 (8.1)                 | 16.1 (6.8)  | -4.02 (-6.24, -1.80)                                        | -1.75 (-3.05, -0.44)                       |
| PM <sub>2.5</sub> µg/m <sup>3</sup>                 | 6.4 (3.6)                  | 5.3 (3.2)   | -1.14 (-2.40, 0.11)                                         | -0.26 (-0.65, 0.12)                        |

- a. Represents the change in pollutant concentration between pre-tunnel (25 Mar 06-24 Mar 07) and post-tunnel (25 Mar 2007-24 Mar 2008)
- b. Adjusted for change in air quality at the 3 regional sites

## DISCUSSION

We did not detect any consistent evidence of detrimental effects on lung function, airway inflammation or respiratory symptoms attributable to short-term exposure to emissions from the tunnel ventilation stack with the exception of increased reporting of dry nose symptoms. This absence of any adverse health effect might be explained by the fact that we did not measure higher pollutant concentrations at the downwind stack sites after the tunnel opened. The finding of increased pollutant levels and increased symptoms and airway inflammation during periods of exposure at the heavily trafficked site supports previous evidence of the detrimental effects of short-term exposures to TRAP.

This study relied on the proposition that the downwind sites we selected were, in fact, exposed to emissions from the tunnel ventilation stack during peak traffic periods. For a downwind site to be impacted by the emission plume from the stack the plume needed to be mixed at ground level prior to reaching the site and subjected to consistent wind direction during the sampling period. We used weather balloons early on each study morning in order to select the most appropriate downwind site. However, it is possible that we were not always able to accurately predict the ground level location of the plume. The sensitivity analysis we conducted was designed to address this potential weakness. The findings of that analysis support the original analysis.

Our finding that eNO, an indicator of airway inflammation, was increased at the heavily trafficked site is consistent with evidence of increased airway inflammation after exposure to TRAP (or diesel) in previous studies. These studies have varied in their measured end-points but include “real-world” exposure studies investigating neutrophilic airway inflammation[4, 5], associations between eNO and PM<sub>2.5</sub>, black carbon and fine particle counts[6] and

1  
2  
3 chamber studies reporting increased neutrophilic airway inflammation,[22-25] increases in  
4  
5 pro-inflammatory cytokines IL-6[26] and IL-8,[25] increased exhaled carbon monoxide  
6  
7 (CO),[22] and increased airway resistance[26, 27].  
8  
9

10  
11  
12 The absence of effects on spirometric function, even at the heavily-trafficked site, is  
13  
14 consistent with findings of chamber studies of diesel exhaust,[22, 24-27] high particle  
15  
16 concentrations,[28] and NO<sub>2</sub>,[29] an in-tunnel study[30] and a commuter study[8]. However,  
17  
18 our findings are inconsistent with the London study of diesel exhaust exposures which  
19  
20 demonstrated small reductions in FEV<sub>1</sub> after 1-2 hr exposures.[5]  
21  
22  
23

24  
25 Strengths of the study include the randomised cross-over design and blinding of participants  
26  
27 by using upwind and downwind stack sites. It is unlikely that the participants were aware of  
28  
29 the upwind/downwind status of their location on any given day. The study was further  
30  
31 strengthened by including the heavily trafficked sites as a positive control. The finding that  
32  
33 pollutant levels were higher, and that subjects had greater airway inflammation, eye and chest  
34  
35 symptom scores at this site, support the validity of the study methodology. The before/after  
36  
37 nature of our study and repeated measures within and across years also strengthened the study  
38  
39 design.  
40  
41  
42  
43

44  
45 A limitation of our study is the differential loss from the groups over time. Common reasons  
46  
47 for non-participation in follow-up years were travel overseas, residence relocation and  
48  
49 changing work practices, all factors unrelated to the experience of study participation.  
50  
51  
52

53  
54 In conclusion, while we found that this ventilation stack, under current operating conditions,  
55  
56 had little measurable short-term health impact, we did demonstrate adverse health effects  
57  
58  
59  
60

1  
2  
3 attributable to short term exposures to TRAP at heavily trafficked locations. These findings  
4  
5 support evidence from existing studies of the adverse health effects attributable to short-term  
6  
7 exposures to TRAP.  
8  
9

10  
11  
12 **Competing interests:**

13  
14 Nectarios Rose was employed with the NSW Health Department on the Biostatistics Training  
15  
16 Scheme at the time the study was conducted.  
17  
18

19  
20  
21 **Authors' Contributions:**

22  
23 CC organised and participated in all aspects of the study including study design, ethics  
24  
25 clearances, recruiting subjects, field work, statistical analysis and led manuscript preparation.  
26  
27 WE was involved in all field work. WX contributed to study design and data analysis. WL  
28  
29 conducted air quality exposure assessment measurements in the field and provided advice on  
30  
31 air quality measurement. NR contributed biostatistical expertise. MR conducted air quality  
32  
33 measurements in the field and wind rose analyses. GM participated in the study design,  
34  
35 statistical analysis, and provided general oversight of the study. All authors contributed to the  
36  
37 preparation of the manuscript.  
38  
39  
40  
41  
42

43 **Acknowledgments:**

44  
45 We are grateful to the volunteers for their participation in this study. Professor Bert  
46  
47 Brunekreef, Vicky Sheppard and Michael Staff gave initial advice on the study design. We  
48  
49 acknowledge the invaluable assistance of the following research staff: Brett Toelle, Elena  
50  
51 Belousova, Adriana Cortes-Waterman, Kitty Ng, Angelica Ordonez, Paula Garay, Adrian  
52  
53 Forero, Jennifer Manning, Renate Thielbeer. The study was overseen by a Scientific  
54  
55 Advisory Group established by the NSW Health Department which provided advice on study  
56  
57  
58  
59  
60

1  
2  
3 design, methodology, analysis and interpretation. It consisted of Professor Bruce Armstrong,  
4  
5 Professor Judy Simpson, Associate Professor Bin Jalaludin, Dr Peter Lewis, and Dr Gavin  
6  
7 Fisher.  
8  
9

10  
11  
12 **Data sharing:**

13  
14 Participants did not provide consent for data sharing but the presented data are anonymised  
15  
16 and risk of identification is low. Ethics clearance will need to be sought.  
17  
18  
19  
20  
21  
22  
23  
24  
25  
26  
27  
28  
29  
30  
31  
32  
33  
34  
35  
36  
37  
38  
39  
40  
41  
42  
43  
44  
45  
46  
47  
48  
49  
50  
51  
52  
53  
54  
55  
56  
57  
58  
59  
60

**REFERENCES**

1. NHMRC. Air Quality In and Around Traffic Tunnels. Final Report 2008. Commonwealth of Australia. ISBN online 1864963573. Available: <http://www.nhmrc.gov.au/guidelines/publications/eh42> [Accessed: 25 February, 2011].
2. Kuykendall JR, Shaw SL, Paustenbach D, et al. Chemicals present in automobile traffic tunnels and the possible community health hazards: A review of the literature. *Inhal Toxicol* 2009;21:747-92.
3. Capon A, Sheppard V, Irvine K, et al. Investigating health effects in a community surrounding a road tunnel stack - a cross sectional study. *Environ Health* 2008;7:10.
4. Jacobs L, Nawrot T, de Geus B, et al. Subclinical responses in healthy cyclists briefly exposed to traffic-related air pollution: an intervention study. *Environ Health* 2010;9:64.
5. McCreanor J, Cullinan P, Nieuwenhuijsen MJ, et al. Respiratory Effects of Exposure to Diesel Traffic in Persons with Asthma. *N Engl J Med* 2007;357:2348-58.
6. Adar SD, Adamkiewicz G, Gold DR, et al. Ambient and Microenvironmental Particles and Exhaled Nitric Oxide before and after a Group Bus Trip. *Environ Health Perspect* 2007;115:507-12.
7. Strak M, Boogaard H, Meliefste K, et al. Respiratory health effects of ultrafine and fine particle exposure in cyclists. *Occup Environ Med* 2010;67:118-24.
8. Zuurbier M, Hoek G, Oldenwening M, et al. Respiratory Effects of Commuters' Exposure to Air Pollution in Traffic. *Epidemiology* 2011;22:219-27.
9. Adar SD, Gold DR, Coull BA, et al. Focused exposures to airborne traffic particles and heart rate variability in the elderly. *Epidemiology* 2007;18:95-103.



- 1  
2  
3 10. Dales R, Liu L, Szyszkowicz M, et al. Particulate air pollution and vascular reactivity:  
4 the bus stop study. *Int Arch Occup Environ Health* 2007;81:159-64.  
5  
6  
7  
8  
9 11. Laumbach RJ, Rich DQ, Gandhi S, et al. Acute Changes in Heart Rate Variability in  
10 Subjects With Diabetes Following a Highway Traffic Exposure. *J Occup Environ Med* 2010  
11 Mar;52:324-31.  
12  
13  
14  
15  
16 12. Zuurbier M, Hoek G, Oldenwening M, et al. In-Traffic Air Pollution Exposure and  
17 CC16, Blood Coagulation, and Inflammation Markers in Healthy Adults. *Environ Health*  
18 *Perspect* 2011;119:1384-9.  
19  
20  
21  
22  
23  
24 13. Weichenthal S, Kulka R, Dubeau A, et al. Traffic-Related Air Pollution and Acute  
25 Changes in Heart Rate Variability and Respiratory Function in Urban Cyclists. *Environ*  
26 *Health Perspect* 2011;119:1373-8.  
27  
28  
29  
30  
31 14. RTA. Annual Average Daily Traffic (AADT) data. Sydney Region, 2005. Available:  
32 [http://www.rta.nsw.gov.au/trafficinformation/downloads/aadtdata\\_dl1.html](http://www.rta.nsw.gov.au/trafficinformation/downloads/aadtdata_dl1.html) [Accessed 16  
33  
34  
35  
36  
37  
38  
39 15. ISAAC. Worldwide variation in the prevalence of symptoms of asthma, allergic  
40 rhinoconjunctivitis, and atopic eczema: ISAAC. *Lancet* 1998;351:1225-32.  
41  
42  
43  
44 16. Toelle B, Ng K, Belousova E, et al. The prevalence of asthma and allergy in  
45 schoolchildren in Belmont, Australia: three cross sectional surveys over 20 years. *BMJ*  
46 2004;328:386-87.  
47  
48  
49  
50  
51  
52 17. Nordin S, Millqvist E, Lowhagen O, et al. A short Chemical Sensitivity Scale for  
53 assessment of airway sensory hyperreactivity. *Int Arch Occup Environ Health* 2004;77:249-  
54  
55  
56  
57  
58  
59  
60

- 1  
2  
3 18. American Thoracic Society. ATS/ERS recommendations for the standardization  
4  
5 procedures for the online and offline measurement of exhaled lower respiratory nitric oxide  
6  
7 and nasal nitric oxide, 2005. *Am J Respir Crit Care Med* 2005;171:912-30.  
8  
9  
10  
11 19. Salome C, Roberts A, Brown N, et al. Exhaled nitric oxide in a population sample of  
12  
13 young adults. *Am J Respir Crit Care Med* 1999;159:911-6.  
14  
15  
16 20. Peat J, Mhrshahi S, Kemp A, et al. Three-year outcomes of dietary fatty acid  
17  
18 modification and house dust mite reduction in the Childhood Asthma Prevention Study. *J*  
19  
20 *Allergy Clin Immunol* 2004;114:807-13.  
21  
22  
23 21. Team Ferrari Environmental. Audit of Ambient Air Monitoring. Lane Cove Tunnel  
24  
25 2006; November 2006, NSW, Australia.  
26  
27  
28  
29 22. Nightingale JA, Maggs R, Cullinan P, et al. Airway Inflammation after Controlled  
30  
31 Exposure to Diesel Exhaust Particulates. *Am J Respir Crit Care Med* 2000;162:161-66.  
32  
33  
34 23. Nordenhall C, Pourazar J, Blomberg A, et al. Airway inflammation following  
35  
36 exposure to diesel exhaust: a study of time kinetics using induced sputum. *Eur Respir J*  
37  
38 2000;15:1046-51.  
39  
40  
41  
42 24. Salvi S, Blomberg A, Rudell B, et al. Acute Inflammatory Responses in the Airways  
43  
44 and Peripheral Blood After Short-Term Exposure to Diesel Exhaust in Healthy Human  
45  
46 Volunteers. *Am J Respir Crit Care Med* 1999;159:702-09.  
47  
48  
49  
50 25. Stenfors N, Nordenhall C, Salvi SS, et al. Different airway inflammatory responses in  
51  
52 asthmatic and healthy humans exposed to diesel. *Eur Respir J* 2004;23:82-86.  
53  
54  
55 26. Nordenhall C, Pourazar J, Ledin M-C, et al. Diesel exhaust enhances airway  
56  
57 responsiveness in asthmatic subjects. *Eur Respir J* 2001;17:909-15.  
58  
59  
60

- 1  
2  
3 27. Rudell B, Ledin MC, Hammarstrom U, et al. Effects on symptoms and lung function  
4 in humans experimentally exposed to diesel exhaust. *Occup Environ Med* 1996;53:658-62.  
5  
6  
7  
8 28. Gong H, Linn WS, Sioutas C, et al. Controlled Exposures of Healthy and Asthmatic  
9 Volunteers to Concentrated Ambient Fine Particles in Los Angeles. *Inhal Toxicol*  
10 2003;15:305-25.  
11  
12  
13  
14  
15  
16 29. Hesterberg TW, Bunn WB, McClellan RO, et al. Critical review of the human data on  
17 short-term nitrogen dioxide (NO<sub>2</sub>) exposures: Evidence for NO<sub>2</sub> no-effect levels. *Crit Rev*  
18 *Toxicol* 2009;39:743-81.  
19  
20  
21  
22  
23  
24 30. Larsson B-M, Grunewald J, Sköld CM, et al. Limited airway effects in mild  
25 asthmatics after exposure to air pollution in a road tunnel. *Resp Med* 2010;104:1912-18.  
26  
27  
28  
29  
30  
31  
32  
33  
34  
35  
36  
37  
38  
39  
40  
41  
42  
43  
44  
45  
46  
47  
48  
49  
50  
51  
52  
53  
54  
55  
56  
57  
58  
59  
60

1  
2  
3  
4  
5  
6  
7  
8  
9  
10  
11  
12  
13  
14  
15  
16  
17  
18  
19  
20  
21  
22  
23  
24  
25  
26  
27  
28  
29  
30  
31  
32  
33  
34  
35  
36  
37  
38  
39  
40  
41  
42  
43  
44  
45  
46  
47  
48  
49  
50  
51  
52  
53  
54  
55  
56  
57  
58  
59  
60

**Figure Legends**

Figure 1 Schematic of fieldwork

Figure 2 Study area and field sites

For peer review only

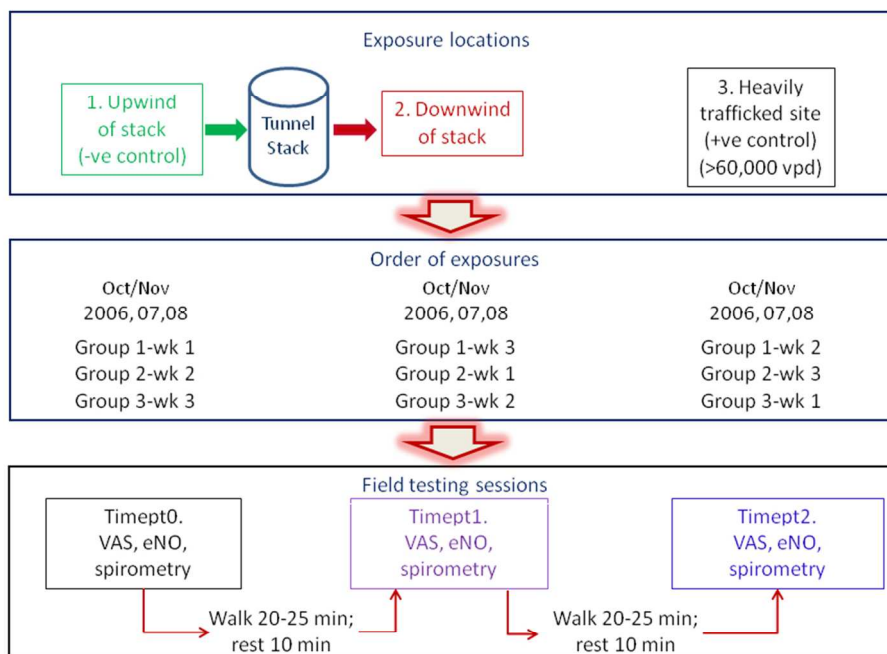

Figure 1. Schematic of fieldwork

Figure 1 Schematic of fieldwork  
254x190mm (96 x 96 DPI)

Review only

1  
2  
3  
4  
5  
6  
7  
8  
9  
10  
11  
12  
13  
14  
15  
16  
17  
18  
19  
20  
21  
22  
23  
24  
25  
26  
27  
28  
29  
30  
31  
32  
33  
34  
35  
36  
37  
38  
39  
40  
41  
42  
43  
44  
45  
46  
47  
48  
49  
50  
51  
52  
53  
54  
55  
56  
57  
58  
59  
60

1  
2  
3  
4  
5  
6  
7  
8  
9  
10  
11  
12  
13  
14  
15  
16  
17  
18  
19  
20  
21  
22  
23  
24  
25  
26  
27  
28  
29  
30  
31  
32  
33  
34  
35  
36  
37  
38  
39  
40  
41  
42  
43  
44  
45  
46  
47  
48  
49  
50  
51  
52  
53  
54  
55  
56  
57  
58  
59  
60

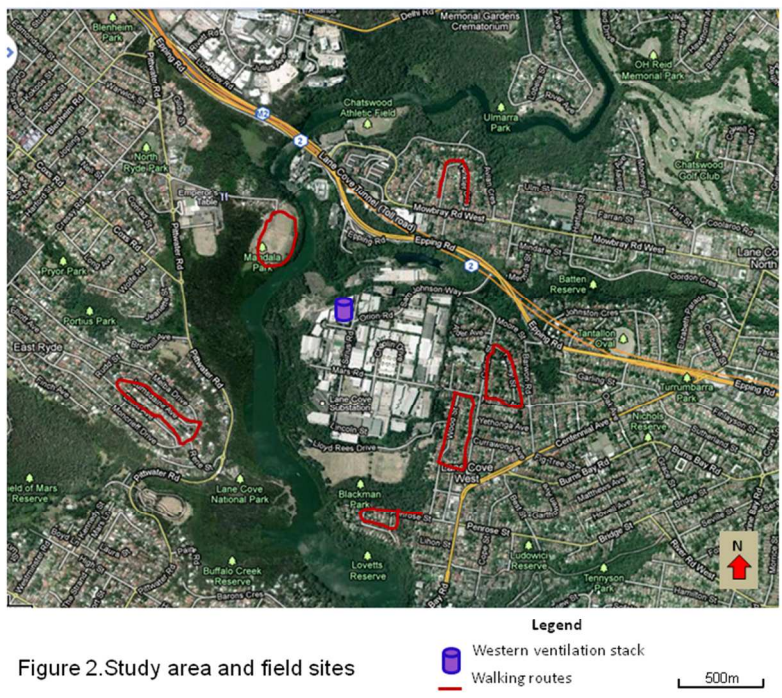

Figure 2. Study area and field sites

Figure 2 Study area and field sites  
254x190mm (96 x 96 DPI)

Review only

**Table 1 Characteristics of cohort members participating in each study year**

|                                        | Prevalence of symptoms (%)  |                               |                               | Prevalence of characteristics recorded in baseline year (2006) for cohort remaining in 2007 and 2008 (%) |      |      |
|----------------------------------------|-----------------------------|-------------------------------|-------------------------------|----------------------------------------------------------------------------------------------------------|------|------|
|                                        | 2006                        | 2007                          | 2008                          | 2006                                                                                                     | 2007 | 2008 |
|                                        | Number of respondents       | 36                            | 26                            | 20                                                                                                       | 36   | 26   |
| <b>Baseline questionnaire symptoms</b> |                             |                               |                               |                                                                                                          |      |      |
| Asthma (ever diagnosis)                | 25                          | 35                            | 25                            | 25                                                                                                       | 35   | 25   |
| Ever wheezed                           | 42                          | 50                            | 40                            | 42                                                                                                       | 46   | 45   |
| Wheeze (in last 3 mths)                | 25                          | 19                            | 5                             | 25                                                                                                       | 31   | 20   |
| Wheeze attacks (in last 3 mths)        | 19                          | 19                            | 5                             | 19                                                                                                       | 23   | 15   |
| Breathless (in last 3 mths)            | 11                          | 19                            | 5                             | 11                                                                                                       | 15   | 10   |
| Cough (in last 3 mths)                 | 56                          | 50                            | 45                            | 56                                                                                                       | 50   | 50   |
| Ever taken asthma medication           | 42                          | 46                            | 40                            | 42                                                                                                       | 46   | 45   |
| Asthma medication (in last 3 mths)     | 22                          | 31                            | 25                            | 22                                                                                                       | 27   | 25   |
| Inhaled steroids (in last 3 mths)      | 17                          | 31                            | 25                            | 17                                                                                                       | 19   | 20   |
| <b>Spirometry &amp; eNO</b>            |                             |                               |                               |                                                                                                          |      |      |
|                                        | <b>2006 Lab<sup>a</sup></b> | <b>2006 Field<sup>b</sup></b> | <b>2007 Field<sup>b</sup></b> | <b>2008 Field<sup>b</sup></b>                                                                            |      |      |
| FEV1 (L)                               | 3.00                        | 2.82                          | 2.62                          | 2.57                                                                                                     |      |      |
| FVC (L)                                | 3.78                        | 3.71                          | 3.57                          | 3.52                                                                                                     |      |      |
| eNO (ppb)                              | 11.14                       | 13.8                          | 22.3                          | 12.5                                                                                                     |      |      |

<sup>a</sup> Measurements made at WIMR lung function laboratory

<sup>b</sup> Field measurements made at field sites

**Table 2 Sensitivity analysis<sup>a</sup> for contrasts<sup>b</sup> in lung function, eNO and symptom scores between the downwind site and the other two sites (upwind and heavily trafficked) adjusted for change from baseline (2006) to subsequent years.**

| Contrast                                                       |                              | FEV1<br>(difference in litres)<br>(95% CI) | FVC<br>(difference in litres)<br>(95% CI) | eNO<br>Ratio (95% CI) | EYE symptoms<br>(diff in score)<br>(95% CI) | THROAT<br>symptoms<br>(diff in score)<br>(95% CI) |
|----------------------------------------------------------------|------------------------------|--------------------------------------------|-------------------------------------------|-----------------------|---------------------------------------------|---------------------------------------------------|
| Location                                                       | Year                         |                                            |                                           |                       |                                             |                                                   |
| Downwind vs<br>(Heavily trafficked<br>and Upwind) <sup>c</sup> | 2007/08 vs 2006 <sup>d</sup> | 0.04 (-0.02, 0.09)                         | 0.10 (0.02, 0.18)                         | 1.10 (0.97, 1.25)     | 0.064 (-0.061, 0.190)                       | 0.149 (-0.171, 0.469)                             |
|                                                                | 2007 vs 2006                 | 0.05 (-0.01, 0.11)                         | 0.11 (0.03, 0.20)                         | 1.13 (0.99, 1.28)     | -0.008 (-0.130, 0.114)                      | 0.089 (-0.270, 0.448)                             |
|                                                                | 2008 vs 2006                 | 0.02 (-0.04, 0.09)                         | 0.11 (0.01, 0.21)                         | 1.09 (0.94, 1.27)     | 0.131 (-0.014, 0.276)                       | 0.230 (-0.109, 0.569)                             |
| Downwind vs<br>Upwind                                          | 2007/08 vs 2006              | 0.02 (-0.05, 0.08)                         | 0.11 (0.02, 0.20)                         | 1.11 (0.96, 1.29)     | 0.039 (-0.106, 0.184)                       | 0.132 (-0.238, 0.501)                             |
|                                                                | 2007 vs 2006                 | 0.03 (-0.04, 0.10)                         | 0.11 (0.01, 0.21)                         | 1.21 (1.04, 1.40)     | -0.043 (-0.184, 0.098)                      | 0.084 (-0.330, 0.497)                             |
|                                                                | 2008 vs 2006                 | -0.01 (-0.08, 0.07)                        | 0.13 (0.01, 0.24)                         | 1.06 (0.89, 1.27)     | 0.112 (-0.057, 0.280)                       | 0.232 (-0.163, 0.626)                             |
| Downwind vs<br>Heavily trafficked                              | 2007/08 vs 2006 <sup>d</sup> | 0.06 (0.01, 0.12)                          | 0.10 (0.01, 0.18)                         | 1.08 (0.95, 1.24)     | 0.089 (-0.044, 0.222)                       | 0.166 (-0.174, 0.506)                             |
|                                                                | 2007 vs 2006                 | 0.07 (0.002, 0.13)                         | 0.11 (0.02, 0.20)                         | 1.05 (0.92, 1.21)     | 0.027 (-0.104, 0.158)                       | 0.094 (-0.292, 0.480)                             |
|                                                                | 2008 vs 2006                 | 0.05 (-0.02, 0.12)                         | 0.09 (-0.01, 0.20)                        | 1.12 (0.96, 1.31)     | 0.150 (-0.005, 0.304)                       | 0.228 (-0.133, 0.590)                             |
| Heavily trafficked vs<br>(Upwind and<br>Downwind) <sup>e</sup> | Overall                      | -0.004 (-0.03, 0.02)                       | -0.02 (-0.05, 0.01)                       | 1.09 (1.04, 1.15)     | 0.039 (-0.011, 0.089)                       | 0.102 (-0.025, 0.230)                             |



| Contrast                                                               |                                    | CHEST symptoms<br>(diff in score)<br>(95% CI) | SNEEZE symptoms<br>(diff in score)<br>(95% CI) | DRY NOSE<br>symptoms<br>(diff in score)<br>(95% CI) | SMELL-STRONG<br>Odds ratio<br>(95% CI) | SMELL-<br>ANNOYING Odds<br>ratio<br>(95% CI) |
|------------------------------------------------------------------------|------------------------------------|-----------------------------------------------|------------------------------------------------|-----------------------------------------------------|----------------------------------------|----------------------------------------------|
| <b>Location</b>                                                        | <b>Year</b>                        |                                               |                                                |                                                     |                                        |                                              |
| <b>Downwind vs<br/>(Heavily trafficked<br/>and Upwind)<sup>c</sup></b> | <b>2007/08 vs 2006<sup>d</sup></b> | -0.179 (-0.503, 0.144)                        | 0.298 (-0.344, 0.941)                          | 0.013 (-0.307, 0.333)                               | 3.07 (1.02, 9.25)                      | 1.58 (0.46, 5.46)                            |
|                                                                        | <b>2007 vs 2006</b>                | -0.105 (-0.428, 0.217)                        | 0.347 (-0.297, 0.992)                          | 0.045 (-0.294, 0.384)                               | 3.66 (1.16, 11.49)                     | 1.36 (0.38, 4.90)                            |
|                                                                        | <b>2008 vs 2006</b>                | -0.264 (-0.661, 0.133)                        | 0.138 (-0.489, 0.764)                          | -0.011 (-0.368, 0.346)                              | 2.19 (0.56, 8.54)                      | 1.20 (0.26, 5.58)                            |
| <b>Downwind vs<br/>Upwind</b>                                          | <b>2007/08 vs 2006<sup>d</sup></b> | -0.030 (-0.403, 0.343)                        | 0.373 (-0.369, 1.116)                          | -0.106 (-0.476, 0.264)                              | 3.26 (0.92, 11.60)                     | 1.10 (0.25, 4.80)                            |
|                                                                        | <b>2007 vs 2006</b>                | 0.036 (-0.336, 0.407)                         | 0.321 (-0.422, 1.064)                          | -0.155 (-0.545, 0.236)                              | 2.73 (0.74, 10.09)                     | 0.75 (0.17, 3.39)                            |
|                                                                        | <b>2008 vs 2006</b>                | -0.073 (-0.535, 0.390)                        | 0.291 (-0.439, 1.021)                          | -0.051 (-0.467, 0.366)                              | 3.40 (0.68, 16.94)                     | 1.02 (0.16, 6.49)                            |
| <b>Downwind vs<br/>Heavily trafficked</b>                              | <b>2007/08 vs 2006<sup>d</sup></b> | -0.329 (-0.672, 0.015)                        | 0.224 (-0.461, 0.908)                          | 0.132 (-0.208, 0.473)                               | 2.89 (0.90, 9.27)                      | 2.27 (0.63, 8.13)                            |
|                                                                        | <b>2007 vs 2006</b>                | -0.247 (-0.593, 0.100)                        | 0.374 (-0.321, 1.069)                          | 0.244 (-0.121, 0.609)                               | 4.90 (1.43, 16.83)                     | 2.47 (0.65, 9.42)                            |
|                                                                        | <b>2008 vs 2006</b>                | -0.455 (-0.879, -0.031)                       | -0.016 (-0.687, 0.655)                         | 0.028 (-0.353, 0.410)                               | 1.41 (0.34, 5.92)                      | 1.42 (0.29, 7.02)                            |
| <b>Heavily trafficked vs<br/>(Upwind and<br/>Downwind)<sup>e</sup></b> | <b>Overall</b>                     | 0.171 (0.042, 0.300)                          | 0.167 (-0.091, 0.426)                          | 0.015 (-0.113, 0.144)                               | 1.89 (1.22, 2.92)                      | 3.63 (2.23, 5.89)                            |

<sup>a</sup> 5 downwind sites and 2 upwind sites in 2006, 2 downwind sites and 2 upwind sites in 2008, and 1 heavily trafficked site in 2006 were excluded for the sensitivity analysis.

<sup>b</sup> Contrasts are derived from mixed effects regression model in which location and year, and the interaction between them are fixed effects, and individual subject intercepts are a random effect. Main contrasts of interest are those included in the table and consist of downwind versus other exposures, as the downwind exposure is the primary exposure of interest.

<sup>c</sup> Represents the comparison of downwind versus heavily trafficked and upwind sites combined.

<sup>d</sup> 2007/08 vs 2006 represents the comparison of both post-tunnel years combined (2007/08) versus the pre-tunnel year (2006).

<sup>e</sup> This represents the comparison of the heavily trafficked site compared to the two stack sites combined, overall (data from all years included), as we anticipated the heavily trafficked site to have higher air pollution levels and health effects to be most prominent for this exposure.

1  
2  
3  
4  
5  
6  
7  
8  
9  
10  
11  
12  
13  
14  
15  
16  
17  
18  
19  
20  
21  
22  
23  
24  
25  
26  
27  
28  
29  
30  
31  
32  
33  
34  
35  
36  
37  
38  
39  
40  
41  
42  
43  
44  
45  
46  
47  
48  
49

**Table 3 Mean pollutant levels by location and year**

| Pollutant                                     | Year | Location           | Total samples | Mean <sup>a</sup> | Median <sup>a</sup> | IQR        | Minimum | Maximum | 95 <sup>th</sup> percentile |
|-----------------------------------------------|------|--------------------|---------------|-------------------|---------------------|------------|---------|---------|-----------------------------|
| <i><b>Nitrogen oxides</b></i> <sup>b</sup>    |      |                    |               |                   |                     |            |         |         |                             |
| NOx                                           | 2006 | Heavily trafficked | 55            | 112.0             | 107.9               | 49.9-142.9 | 28.7    | 426.0   | 269.0                       |
|                                               |      | Downwind           | 56            | 34.6              | 37.2                | 16.7-50.5  | 5.7     | 89.7    | 79.4                        |
|                                               |      | Upwind             | 51            | 35.4              | 31.1                | 12.6-47.3  | 2.4     | 100.8   | 91.0                        |
|                                               | 2007 | Heavily trafficked | 51            | 239.8             | 128.6               | 67.1-234.0 | 14.8    | 1912.0  | 784.0                       |
|                                               |      | Downwind           | 52            | 30.2              | 16.2                | 8.4-44.5   | 4.6     | 117.9   | 96.8                        |
|                                               |      | Upwind             | 46            | 37.0              | 20.7                | 12.2-57.2  | 3.5     | 152.4   | 93.1                        |
|                                               | 2008 | Heavily trafficked | 54            | 26.7              | 16.8                | 9.9-28.6   | 5.5     | 115.7   | 98.0                        |
|                                               |      | Downwind           | 51            | 6.8               | 7.1                 | 4.3-8.5    | 2.1     | 18.9    | 13.0                        |
|                                               |      | Upwind             | 53            | 6.2               | 5.1                 | 3.6-8.2    | 2.5     | 16.7    | 12.5                        |
| NO2                                           | 2006 | Heavily trafficked | 55            | 4.3               | 4.1                 | 3.0-5.2    | 1.3     | 12.0    | 8.0                         |
|                                               |      | Downwind           | 56            | 3.2               | 3.2                 | 2.1-4.3    | 1.3     | 5.7     | 5.1                         |
|                                               |      | Upwind             | 51            | 2.4               | 2.1                 | 1.7-3.0    | 0.5     | 16.0    | 4.2                         |
|                                               | 2007 | Heavily trafficked | 51            | 13.5              | 13.6                | 5.0-17.6   | 1.4     | 69.0    | 31.0                        |
|                                               |      | Downwind           | 52            | 4.9               | 5.1                 | 1.6-7.1    | 0.1     | 18.2    | 9.5                         |
|                                               |      | Upwind             | 47            | 5.9               | 4.8                 | 2.9-6.8    | 0.1     | 15.7    | 13.8                        |
|                                               | 2008 | Heavily trafficked | 54            | 0.6               | 1.5                 | 0.1-1.7    | 0.1     | 4.1     | 3.2                         |
|                                               |      | Downwind           | 51            | 1.1               | 1.1                 | 0.8-1.4    | 0.1     | 2.7     | 2.2                         |
|                                               |      | Upwind             | 53            | 1.1               | 1.0                 | 0.7-1.4    | 0.1     | 2.3     | 2.0                         |
| <i><b>Particulate matter</b></i> <sup>c</sup> |      |                    |               |                   |                     |            |         |         |                             |
| PM10                                          | 2006 | Heavily trafficked | 372           | 74.2              | 81.2                | 46.3-99.1  | 17.9    | 168.1   | 118.7                       |
|                                               |      | Downwind           | 374           | 58.1              | 57.0                | 33.4-84.0  | 15.1    | 195.1   | 106.7                       |

| Pollutant | Year | Location           | Total samples      | Mean <sup>a</sup> | Median <sup>a</sup> | IQR       | Minimum   | Maximum | 95 <sup>th</sup> percentile |      |
|-----------|------|--------------------|--------------------|-------------------|---------------------|-----------|-----------|---------|-----------------------------|------|
| PM2.5     | 2007 | Upwind             | 409                | 69.0              | 57.1                | 40.7-97.6 | 13.4      | 184.8   | 152.4                       |      |
|           |      | Heavily trafficked | 352                | 42.0              | 38.8                | 30.8-47.7 | 14.8      | 230.9   | 71.0                        |      |
|           |      | Downwind           | 420                | 38.5              | 40.8                | 28.8-48.8 | 10.9      | 74.4    | 58.8                        |      |
|           | 2008 | Upwind             | 370                | 38.9              | 36.9                | 25.8-50.4 | 9.8       | 136.2   | 75.6                        |      |
|           |      | Heavily trafficked | 310                | 39.4              | 40.3                | 32.9-44.9 | 25.3      | 81.6    | 50.6                        |      |
|           |      | Downwind           | 305                | 26.6              | 24.4                | 23.2-30.3 | 16.1      | 37.9    | 34.2                        |      |
|           | 2006 | Upwind             | 308                | 26.5              | 23.5                | 21.5-30.8 | 16.2      | 61.2    | 38.5                        |      |
|           |      | Heavily trafficked | 372                | 14.2              | 15.3                | 9.8-17.3  | 3.9       | 33.6    | 23.4                        |      |
|           |      | Downwind           | 374                | 11.3              | 10.6                | 6.6-15.2  | 3.4       | 25.2    | 22.3                        |      |
|           |      | Upwind             | 409                | 13.1              | 10.8                | 9.2-14.6  | 3.1       | 44.3    | 31.8                        |      |
|           |      | 2007               | Heavily trafficked | 352               | 12.9                | 15.1      | 8.0-17.4  | 2.4     | 32.5                        | 18.9 |
|           |      |                    | Downwind           | 420               | 10.9                | 12.8      | 7.6-15.1  | 1.3     | 18.2                        | 16.4 |
|           |      |                    | Upwind             | 370               | 11.1                | 13.0      | 7.5-15.4  | 1.2     | 19.7                        | 17.6 |
|           |      | 2008               | Heavily trafficked | 310               | 11.8                | 12.0      | 10.6-13.2 | 8.7     | 17.8                        | 14.7 |
|           |      |                    | Downwind           | 305               | 10.7                | 10.0      | 9.6-11.0  | 8.1     | 16.4                        | 13.9 |
| Upwind    | 308  |                    | 10.8               | 10.5              | 9.7-11.6            | 8.3       | 16.3      | 14.2    |                             |      |
| PM1       | 2006 | Heavily trafficked | 372                | 2.4               | 2.4                 | 1.7-2.8   | 0.6       | 6.8     | 4.1                         |      |
|           |      | Downwind           | 374                | 1.8               | 1.6                 | 1.1-2.4   | 0.4       | 5.1     | 3.9                         |      |
|           |      | Upwind             | 409                | 2.1               | 1.5                 | 1.3-2.2   | 0.4       | 10.4    | 5.6                         |      |
|           | 2007 | Heavily trafficked | 352                | 2.6               | 3.1                 | 1.8-3.3   | 0.7       | 8.0     | 4.1                         |      |
|           |      | Downwind           | 420                | 1.9               | 2.3                 | 1.4-2.6   | 0.2       | 3.9     | 2.8                         |      |
|           |      | Upwind             | 370                | 2.0               | 2.3                 | 1.4-2.6   | 0.1       | 5.2     | 3.1                         |      |

| Pollutant                          | Year             | Location           | Total samples      | Mean <sup>a</sup> | Median <sup>a</sup> | IQR       | Minimum   | Maximum | 95 <sup>th</sup> percentile |  |
|------------------------------------|------------------|--------------------|--------------------|-------------------|---------------------|-----------|-----------|---------|-----------------------------|--|
| <b>VOC<sup>d</sup><br/>Benzene</b> | <b>2008</b>      | Heavily trafficked | 310                | 2.3               | 2.3                 | 2.0-2.5   | 1.6       | 3.9     | 2.9                         |  |
|                                    |                  | Downwind           | 305                | 2.0               | 1.9                 | 1.7-2.1   | 1.6       | 3.0     | 2.6                         |  |
|                                    |                  | Upwind             | 308                | 2.0               | 2.1                 | 1.8-2.3   | 1.4       | 3.6     | 2.5                         |  |
|                                    | <b>2006</b>      | Heavily trafficked | 6                  | 1.16              | 1.07                | 0.98-1.40 | 0.74      | 1.70    |                             |  |
|                                    |                  | Downwind           | 6                  | 0.57              | 0.55                | 0.44-0.69 | 0.42      | 0.75    |                             |  |
|                                    |                  | Upwind             | 6                  | 0.52              | 0.49                | 0.31-0.70 | 0.25      | 0.87    |                             |  |
|                                    | <b>Butadiene</b> | <b>2008</b>        | Heavily trafficked | 6                 | 0.56                | 0.44      | 0.42-0.71 | 0.35    | 1.00                        |  |
|                                    |                  |                    | Downwind           | 6                 | 0.21                | 0.18      | 0.17-0.23 | 0.16    | 0.32                        |  |
|                                    |                  |                    | Upwind             | 6                 | 0.22                | 0.23      | 0.17-0.26 | 0.13    | 0.28                        |  |
| <b>2006</b>                        |                  | Heavily trafficked | 6                  | 0.38              | 0.33                | 0.26-0.51 | 0.23      | 0.59    |                             |  |
|                                    |                  | Downwind           | 6                  | 0.16              | 0.18                | 0.14-0.18 | 0.05      | 0.24    |                             |  |
|                                    |                  | Upwind             | 6                  | 0.14              | 0.12                | 0.08-0.17 | 0.06      | 0.30    |                             |  |
| <b>2008</b>                        |                  | Heavily trafficked | 6                  | 0.13              | 0.11                | 0.10-0.15 | 0.04      | 0.27    |                             |  |
|                                    |                  | Downwind           | 6                  | 0.06              | 0.05                | 0.04-0.08 | 0.04      | 0.13    |                             |  |
|                                    |                  | Upwind             | 6                  | 0.08              | 0.08                | 0.04-0.10 | 0.04      | 0.17    |                             |  |
| <b>Toluene</b>                     | <b>2006</b>      | Heavily trafficked | 6                  | 6.88              | 6.45                | 4.70-8.40 | 4.50      | 10.80   |                             |  |
|                                    |                  | Downwind           | 6                  | 2.80              | 2.65                | 2.50-3.00 | 2.40      | 3.60    |                             |  |
|                                    |                  | Upwind             | 6                  | 3.12              | 3.20                | 2.20-3.70 | 1.20      | 5.20    |                             |  |
|                                    | <b>2008</b>      | Heavily trafficked | 4                  | 2.80              | 2.60                | 2.05-3.55 | 1.50      | 4.50    |                             |  |
|                                    |                  | Downwind           | 4                  | 2.33              | 2.00                | 1.60-3.05 | 1.40      | 3.90    |                             |  |
|                                    |                  | Upwind             | 4                  | 4.28              | 3.90                | 3.05-5.50 | 2.30      | 7.00    |                             |  |

| Pollutant    | Year | Location           | Total samples | Mean <sup>a</sup> | Median <sup>a</sup> | IQR       | Minimum | Maximum | 95 <sup>th</sup> percentile |
|--------------|------|--------------------|---------------|-------------------|---------------------|-----------|---------|---------|-----------------------------|
| Ethylbenzene | 2006 | Heavily trafficked | 6             | 0.94              | 0.82                | 0.60-1.10 | 0.58    | 1.70    |                             |
|              |      | Downwind           | 6             | 0.51              | 0.51                | 0.40-0.60 | 0.36    | 0.70    |                             |
|              |      | Upwind             | 6             | 0.49              | 0.38                | 0.30-0.44 | 0.24    | 1.20    |                             |
|              | 2008 | Heavily trafficked | 6             | 0.39              | 0.29                | 0.17-0.36 | 0.15    | 1.10    |                             |
|              |      | Downwind           | 6             | 0.40              | 0.21                | 0.12-0.26 | 0.09    | 1.50    |                             |
|              |      | Upwind             | 6             | 0.52              | 0.27                | 0.12-0.47 | 0.09    | 1.90    |                             |
| mp-xylene    | 2006 | Heavily trafficked | 6             | 3.99              | 3.31                | 2.40-5.20 | 1.99    | 7.70    |                             |
|              |      | Downwind           | 6             | 1.88              | 1.65                | 1.40-2.50 | 1.30    | 2.80    |                             |
|              |      | Upwind             | 6             | 1.74              | 1.55                | 0.90-1.60 | 0.86    | 4.00    |                             |
|              | 2008 | Heavily trafficked | 6             | 0.88              | 0.81                | 0.60-1.10 | 0.55    | 1.40    |                             |
|              |      | Downwind           | 6             | 0.61              | 0.49                | 0.38-0.53 | 0.28    | 1.50    |                             |
|              |      | Upwind             | 6             | 0.68              | 0.46                | 0.31-0.81 | 0.30    | 1.80    |                             |
| o-xylene     | 2006 | Heavily trafficked | 6             | 1.44              | 1.23                | 0.90-1.80 | 0.78    | 2.70    |                             |
|              |      | Downwind           | 6             | 0.74              | 0.70                | 0.54-0.92 | 0.50    | 1.10    |                             |
|              |      | Upwind             | 6             | 0.70              | 0.59                | 0.39-0.67 | 0.35    | 1.60    |                             |
|              | 2008 | Heavily trafficked | 6             | 0.37              | 0.34                | 0.23-0.46 | 0.22    | 0.61    |                             |
|              |      | Downwind           | 6             | 0.26              | 0.19                | 0.13-0.21 | 0.13    | 0.70    |                             |
|              |      | Upwind             | 6             | 0.28              | 0.21                | 0.13-0.32 | 0.10    | 0.68    |                             |

<sup>a</sup> Means and medians calculated by taking the mean of daily averages at each site. IQR, minimum and maximum values using all (not averaged) data.

1  
2  
3  
4  
5  
6  
7  
8  
9  
10  
11  
12  
13  
14  
15  
16  
17  
18  
19  
20  
21  
22  
23  
24  
25  
26  
27  
28  
29  
30  
31  
32  
33  
34  
35  
36  
37  
38  
39  
40  
41  
42  
43  
44  
45  
46  
47  
48  
49

- b Grab sample collected for NO<sub>2</sub> and NO<sub>x</sub> analysis at each every 15 minutes and averaged for each two hour exposure period.
  - c PM data collected every two minutes.
  - d One VOC sample collected at each site to provide average reading for each two hour exposure period.
- 2007 data not used in analysis due to different detection limits used by different laboratory.  
95<sup>th</sup> percentile not reported for VOCs as sample size too small; 95<sup>th</sup> percentile equivalent to maximum reading.

For peer review only

Table 4 Sensitivity analysis<sup>a</sup> for pollutant contrasts

| Contrast                                    |                | NO <sub>x</sub> ratio<br>(95% CI) | NO <sub>2</sub> ratio<br>(95% CI) | PM <sub>10</sub> ratio<br>(95% CI) | PM <sub>2.5</sub> ratio<br>(95% CI) | PM <sub>1</sub> ratio<br>(95% CI) |
|---------------------------------------------|----------------|-----------------------------------|-----------------------------------|------------------------------------|-------------------------------------|-----------------------------------|
| Location                                    | Year           |                                   |                                   |                                    |                                     |                                   |
| Downwind vs (Heavily trafficked and Upwind) | 2007/8 vs 2006 | 0.97 (0.29, 3.29)                 | 0.84 (0.25, 2.86)                 | 1.14 (0.57, 2.26)                  | 1.22 (0.42, 3.58)                   | 1.26 (0.50, 3.19)                 |
|                                             | 2007 vs 2006   | 0.69 (0.16, 2.92)                 | 0.52 (0.14, 2.00)                 | 1.24 (0.56, 2.75)                  | 1.15 (0.31, 4.21)                   | 1.12 (0.37, 3.44)                 |
|                                             | 2008 vs 2006   | 1.37 (0.55, 3.39)                 | 1.36 (0.45, 4.05)                 | 1.05 (0.50, 2.17)                  | 1.30 (0.66, 2.55)                   | 1.42 (0.77, 2.61)                 |
| Downwind vs Upwind                          | 2007/8 vs 2006 | 1.37 (0.34, 5.61)                 | 0.75 (0.18, 3.06)                 | 1.41 (0.64, 3.11)                  | 1.43 (0.41, 4.95)                   | 1.48 (0.51, 4.34)                 |
|                                             | 2007 vs 2006   | 1.02 (0.19, 5.43)                 | 0.59 (0.13, 2.76)                 | 1.43 (0.57, 3.58)                  | 1.40 (0.32, 6.24)                   | 1.39 (0.38, 5.02)                 |
|                                             | 2008 vs 2006   | 1.84 (0.64, 5.28)                 | 0.94 (0.26, 3.38)                 | 1.39 (0.59, 3.27)                  | 1.45 (0.66, 3.20)                   | 1.59 (0.78, 3.24)                 |
| Downwind vs Heavily trafficked              | 2007/8 vs 2006 | 0.69 (0.19, 2.51)                 | 0.95 (0.26, 3.49)                 | 0.92 (0.44, 1.90)                  | 1.04 (0.33, 3.27)                   | 1.07 (0.40, 2.87)                 |
|                                             | 2007 vs 2006   | 0.46 (0.10, 2.20)                 | 0.47 (0.11, 1.99)                 | 1.07 (0.45, 2.55)                  | 0.94 (0.23, 3.83)                   | 0.91 (0.27, 3.05)                 |
|                                             | 2008 vs 2006   | 1.02 (0.39, 2.68)                 | 1.95 (0.61, 6.23)                 | 0.79 (0.36, 1.70)                  | 1.16 (0.57, 2.37)                   | 1.26 (0.66, 2.41)                 |
| Heavily trafficked vs (Upwind and Downwind) | Overall        | 3.86 (2.46, 6.04)*                | 1.42 (0.91, 2.23)                 | 1.18 (0.92, 1.53)                  | 1.12 (0.75, 1.68)                   | 1.23 (0.87, 1.74)                 |

<sup>a</sup> 5 downwind sites and 2 upwind sites in 2006, 2 downwind sites and 2 upwind sites in 2008, and 1 heavily trafficked site in 2006, were excluded for the sensitivity analysis



**A randomised cross-over cohort study of exposure to emissions from a road tunnel ventilation stack**

|                                 |                                                                                                                                                                                                                                                                                                                                                                                                                                                                                                                                  |
|---------------------------------|----------------------------------------------------------------------------------------------------------------------------------------------------------------------------------------------------------------------------------------------------------------------------------------------------------------------------------------------------------------------------------------------------------------------------------------------------------------------------------------------------------------------------------|
| Journal:                        | <i>BMJ Open</i>                                                                                                                                                                                                                                                                                                                                                                                                                                                                                                                  |
| Manuscript ID:                  | bmjopen-2012-001201.R1                                                                                                                                                                                                                                                                                                                                                                                                                                                                                                           |
| Article Type:                   | Research                                                                                                                                                                                                                                                                                                                                                                                                                                                                                                                         |
| Date Submitted by the Author:   | 21-Jun-2012                                                                                                                                                                                                                                                                                                                                                                                                                                                                                                                      |
| Complete List of Authors:       | Cowie, Christine; Woolcock Institute of Medical Research, Respiratory & Environmental Epidemiology<br>Ezz, Wafaa; Woolcock Institute of Medical Research, Respiratory & Environmental Epidemiology<br>Xuan, Wei; Woolcock Institute of Medical Research, Respiratory & Environmental Epidemiology<br>Lilley, William; CSIRO, CSIRO Energy Technology<br>Rose, Nectarios; NSW Health Department,<br>Rae, Michael; CSIRO, CSIRO Energy Technology<br>Marks, Guy; Woolcock Institute of Medical Research, The University of Sydney, |
| <b>Primary Subject Heading</b>: | Epidemiology                                                                                                                                                                                                                                                                                                                                                                                                                                                                                                                     |
| Secondary Subject Heading:      | Respiratory medicine, Public health                                                                                                                                                                                                                                                                                                                                                                                                                                                                                              |
| Keywords:                       | Epidemiology < THORACIC MEDICINE, EPIDEMIOLOGY, PUBLIC HEALTH, TRAFFIC, AIR POLLUTION, ACUTE                                                                                                                                                                                                                                                                                                                                                                                                                                     |
|                                 |                                                                                                                                                                                                                                                                                                                                                                                                                                                                                                                                  |

SCHOLARONE™  
Manuscripts

only



**TITLE PAGE****Title**

A randomised cross-over cohort study of exposure to emissions from a road tunnel  
ventilation stack

**Authors**

Christine T. Cowie<sup>a,b</sup>, Wafaa Ezz<sup>a,b</sup>, Wei Xuan<sup>ab</sup>, William Lilley<sup>c</sup>, Nectarios Rose<sup>a,d</sup>, Michael  
Rae<sup>c</sup>, Guy B. Marks<sup>a</sup>

**Author affiliations**

- a. Woolcock Institute of Medical Research, Sydney, NSW, Australia
- b. Cooperative Research Centre for Asthma and Airways, Sydney, Australia
- c. Commonwealth Scientific and Industrial Research Organisation, Newcastle, Australia
- d. NSW Health Department, Sydney, NSW, Australia

**Corresponding author**

Guy Marks

Respiratory and Environmental Epidemiology

Woolcock Institute of Medical Research

PO Box M77

Missenden Road PO

Sydney NSW 2050

Australia

Tel: +61 2 9114 0466

fax: +61 2 9114 0000

1  
2  
3 email: [guy.marks@sydney.edu.au](mailto:guy.marks@sydney.edu.au)  
4  
5  
6

7 **Keywords**  
8

9  
10 Road tunnel, respiratory, emissions, stack, acute exposures  
11

12  
13 **Word count:** 3698  
14  
15  
16  
17  
18  
19  
20  
21  
22  
23  
24  
25  
26  
27  
28  
29  
30  
31  
32  
33  
34  
35  
36  
37  
38  
39  
40  
41  
42  
43  
44  
45  
46  
47  
48  
49  
50  
51  
52  
53  
54  
55  
56  
57  
58  
59  
60

For peer review only

## ABSTRACT

### Background & objective

Road tunnels are increasingly important components of urban infrastructure. However knowledge of their health impact on surrounding communities is limited. Our objective was to estimate the short-term respiratory health effects of exposure to emissions from a road tunnel ventilation stack.

### Methods

We conducted a randomised cross-over cohort study in 36 volunteers who underwent three exposure scenarios in 2006 before the road tunnel opened, and in 2007 (n=27) and 2008 (n=20) after the tunnel opened. Exposure downwind of the stack was compared to upwind of the stack and to a distant heavily trafficked location adjacent to a main road. Spirometry, exhaled nitric oxide (eNO), and symptom scores were measured repeatedly during each two hour exposure session.

### Results

Downwind locations were associated with increased reports of “dry nose” (score difference 0.36; 95% CI 0.09-0.63) compared with the control location (2006 vs 2007/08), but not with impaired lung function, increased airway inflammation or other symptoms. The heavily trafficked location was associated with significantly increased eNO (ratio=1.09; 95% CI: 1.04-1.14), eye (score difference 0.05; 95% CI: 0.01-0.10) and chest (score difference 0.21; 95% CI: 0.09-0.33) symptoms compared to the stack locations.

### Conclusions

1  
2  
3 There was no consistent evidence of adverse respiratory effects from short term exposures  
4  
5 downwind of the tunnel ventilation stack, except for dry nose symptoms. However, the  
6  
7 findings of increased airway inflammation and symptoms in subjects after only two hours  
8  
9 exposure at the heavily trafficked location, is suggestive of detrimental effects of short-term  
10  
11 exposures to traffic related air pollution.  
12  
13  
14  
15  
16  
17  
18  
19  
20  
21  
22  
23  
24  
25  
26  
27  
28  
29  
30  
31  
32  
33  
34  
35  
36  
37  
38  
39  
40  
41  
42  
43  
44  
45  
46  
47  
48  
49  
50  
51  
52  
53  
54  
55  
56  
57  
58  
59  
60

For peer review only

## ARTICLE SUMMARY

### Article focus

- Road tunnels are being increasingly commissioned in major cities around the world to alleviate traffic on surface roads.
- There is little existing data on the health impacts of exposure to tunnel emissions on surrounding communities.
- Our objective was to estimate the short-term respiratory health effects of exposure to emissions from a road tunnel ventilation stack.

### Key messages

- There was no consistent evidence of adverse respiratory effects of being located downwind of the tunnel ventilation stack, except for an increase in dry nose symptoms.
- Short term (two hour) exposures to a heavily trafficked control site were associated with increased airway inflammation, eye and chest symptoms.
- The findings suggest detrimental effects of short-term exposure to traffic related air pollution, but are not supportive of consistent adverse effects from short-term exposures downwind of the tunnel ventilation stacks.

### Strengths and limitations of this study

- Strengths of the study include: the randomised cross-over cohort design and blinding of participants; use of a heavily trafficked site as a positive control; the before/after nature of our study; the repeated measures within and across years; and the sensitivity analysis.
- A limitation of our study is the differential loss from the groups over time.

## FUNDING STATEMENT

The study was funded by the CRC for Asthma & Airways and the NSW Health Department.

## INTRODUCTION

Road tunnels are increasingly important components of urban infrastructure. However, few studies have investigated the adverse impacts of exposure to emissions from road tunnel portals or their ventilation stacks, or the beneficial effects of diverting traffic from surface roads into tunnels. This may be due to the difficulty in designing studies that distinguish between emissions from road tunnels and emissions from general surrounding traffic [1, 2]. Only one study has investigated the association between exposure to emissions from a road tunnel ventilation stack and health effects. That cross-sectional study found no evidence of increased respiratory or irritant symptoms in high exposure zones compared to low exposure zones [3].

Several recent studies have reported designs that may be helpful for assessing this type of exposure. Each has investigated the respiratory[4-8] or cardiovascular[9-13] effects of very short term exposures (typically two hours or less) to traffic related air pollution (TRAP) and diesel emissions in real-world settings. All are characterised by their quasi-experimental study design in which participants were taken to locations (busy traffic, inner city with diesel only, quiet park like) or underwent realistic commutes (in buses, cars or bicycling) where the investigators expected elevated exposures or contrasts in exposures to TRAP to occur.

However, these designs have not yet been applied to the assessment of new point sources, such as emissions from road tunnels and their ventilation stacks.

A proposal to build a new road tunnel in Sydney with emissions vented to the surface via ventilation stacks presented us with an opportunity to prospectively test the hypothesis that short-term exposure to emissions from the tunnel ventilation stacks has an adverse effect on respiratory health.

## METHODS

The study was conducted in Sydney, Australia between 2006 and 2008, and approved by the University of Sydney Human Research Ethics Committee (HREC) on 17 August, 2006.

### Study design & subjects

The study was a randomised, controlled cross-over trial. Thirty-six volunteers were recruited through a university, student and workplace networks, and the Woolcock Institute of Medical Research's (WIMR) Volunteer Database. Eligibility criteria included: non-smokers; ability to walk easily for 2 hours; able to participate in 2006 and 2007; sense of smell not compromised; and not pregnant.

Study participants were randomised into three equal-size groups, which defined the order of exposure in the cross-over study. Three exposure conditions were tested: "downwind" of the LCT western ventilation stack (putative adverse exposure); "upwind" of the stack (negative control); and a "heavily trafficked site" (positive control). The three exposures took place over six days in October-November in 2006, before the tunnel opened, and during the same months in 2007 and 2008, after the tunnel opened, to account for seasonal influences. Data collection extended to 2008, the second follow-up year, as it was expected that traffic volumes in the tunnel would be increased between 2007 and 2008. Traffic volumes in November 2007 and 2008 were 49,218 vehicles per day (vpd) and 58,218 vpd respectively.

Each exposure comprised two morning sessions during peak traffic periods (7am-9am) on two consecutive weekdays (Tuesdays and Wednesdays) (Figure 1). There was a six day washout period between exposure conditions. The order of group allocation to exposure type was the same each year, except in 2008 where order of testing for two groups was changed twice due to changing wind conditions.

## Exposure locations

The tunnel ventilation stacks are located at its eastern and western ends, respectively. As the eastern stack is located close to tunnel feeder roads, attribution of an effect solely due to the stack would be difficult. Hence, we decided to conduct the study at sites located around the western ventilation stack using predetermined walking routes (Figure 2). The heavily trafficked (positive control) site was located alongside a major urban commuter road close to Sydney's central business district and remote from the study area. The annual average daily traffic volume at this site was 64,418 vehicles per day during 2005.[14]

We selected six sites in a 500-1000m circumference around the stack and two sites on either side of the major commuter road. The stack sites were chosen based on the feasibility of accommodating testing procedures and identification of 20 min walking routes, which were all on quiet residential streets with low traffic volumes, and were not undulating. Participants were asked to walk at a comfortable, even pace.

For each study day, two of the six stack sites were selected and defined as "upwind" or "downwind" sites based on the wind direction recorded at 6am that morning.

## Baseline assessment

Prior to fieldwork we conducted spirometry, measured nitric oxide concentration in exhaled breath (eNO) and performed allergen skin prick tests (SPT) on participants in the WIMR laboratory. Participants completed a questionnaire recording asthma diagnosis, wheeze, medication use, respiratory symptoms, and odour perception,[15-17] as experienced in the preceding three months. Participants also completed a series of 14 visual analogue scales



1  
2  
3 (VAS) to rate their perception of respiratory and chest, nose, throat and eye symptoms. They  
4  
5 rated odour perception (strength and annoyance) on a VAS if they responded affirmatively to  
6  
7 detecting odour. Symptoms were ranked on VAS scales from “no symptoms” (0) to “the  
8  
9 worst I can imagine” (100). These data were used to determine pre-existing disease and to  
10  
11 characterise the study population.  
12

### 13 14 15 16 **Fieldwork**

17  
18 Participants were either transported in a mini-van or made their own way to the field site.

19  
20 They were asked to wear N95 mask (Alpha Protech N95 particulate face mask certified to  
21  
22 NIOSH standards) from when they left home each morning until measurements were made,  
23  
24 to minimise exposure on route. They were asked to withhold long-acting bronchodilators for  
25  
26 12 hours and short-acting bronchodilators for 6 hours before fieldwork.  
27  
28

29  
30 Each exposure period commenced at 7am and lasted approximately two hours, incorporating  
31  
32 two 20 minute periods of walking and two rest periods (Figure 1). During each exposure,  
33  
34 subjects underwent three rounds of testing including completion of VAS forms, eNO  
35  
36 measurement and spirometry, in that order, and at timepoints as indicated in Figure 1.  
37  
38

39  
40 Participants were allocated to pairs for testing and walking, with each pairing maintained (as  
41  
42 much as possible) throughout the three years of testing.  
43  
44  
45

### 46 47 *Clinical tests*

48  
49 We used a hand-held spirometer (QRS Diagnostic: Z-5000-2668) linked to Office Medic  
50  
51 software (Version 4.5i) to record forced expiratory volume in 1 second (FEV<sub>1</sub>), and forced  
52  
53 vital capacity (FVC). Spirometry was performed according to the American Thoracic  
54  
55 Society/European Respiratory Society (ATS/ERS) criteria with technically unsatisfactory  
56  
57  
58  
59  
60

1  
2  
3 curves identified at the time of testing and again after fieldwork. These technically  
4  
5 unsatisfactory curves were excluded from analysis. To improve reliability of the measures we  
6  
7 chose the highest of two values reproducible within 150 ml for FEV<sub>1</sub> and FVC. Where not  
8  
9 reproducible, curves were rechecked for quality and, if acceptable, the highest measures for  
10  
11 FEV<sub>1</sub> and FVC were selected.  
12  
13

14  
15  
16 We used an off-line technique to measure eNO, according to ATS/ERS criteria[18] at an  
17  
18 expiratory flow rate of 200 ml/sec[19]. Exhaled breath was collected into a 3L chemically  
19  
20 inert bag through a rotameter incorporating a filter and an NO scrubber on the inlet valve, to  
21  
22 exclude the influence of ambient NO levels on personal NO concentrations. The NO  
23  
24 concentration was measured within 24 hours of collection using a chemiluminescence  
25  
26 analyser (ThermoEnvironmental 42°C).  
27  
28  
29

30  
31  
32 Skin prick tests were performed using airborne allergens for house dust mites (*D.*  
33  
34 *pteronyssinus*, *D. farinae*), mould (*Alternaria*, *Aspergillus*), cat pelt, dog, cockroach, ryegrass,  
35  
36 and grass mix (Hollister-Stier).[20] Wheal sizes were measured as the average of the largest  
37  
38 diameter and its perpendicular at 15 minutes. Wheals larger than 3mm in diameter and larger  
39  
40 than the negative control were considered positive. Subjects with any positive skin prick test  
41  
42 were classified as atopic.  
43  
44  
45

#### 46 47 *Air quality monitoring*

48  
49 Air quality monitoring took place on each field testing day at each visited site, constituting a  
50  
51 total of 18 measurement days. We collected samples for particulate matter (PM<sub>10</sub>, PM<sub>2.5</sub> and  
52  
53 PM<sub>1</sub>), volatile organic compounds (VOCS), total oxides of nitrogen (NO<sub>x</sub>), nitrogen dioxide  
54  
55 (NO<sub>2</sub>) and nitrogen oxide (NO).  
56  
57  
58  
59  
60

1  
2  
3  
4  
5 We used Osiris instruments to collect PM data in 2006 and 2007 and Topas units for  
6 collection of PM data in 2008 due to the unavailability of Osiris instruments. Concentrations  
7 of PM data were recorded as 2 minute averages.  
8  
9

10  
11  
12  
13  
14 VOC samples were collected using a stainless steel canister and inlet designed to collect an  
15 evenly spaced sample over the two hours of fieldwork, providing an average reading. The  
16 samples were analysed at the CSIRO Laboratory in 2006 and 2008 for 1,3-butadiene,  
17 benzene, toluene, ethylbenzene, *m*- + *p*-xylene, *o*-xylene. Samples were analysed by an  
18 alternative laboratory in 2007 but the limit of detection (DL) was higher and given that many  
19 of the readings were below this DL we excluded the 2007 data.  
20  
21  
22  
23  
24  
25  
26  
27  
28

29  
30 Samples for ambient NO<sub>x</sub>/NO<sub>2</sub> were collected via grab samples every 15 minutes at each site  
31 using identical collection bags as those used for eNO collection. These were analysed (within  
32 24 hours) as for eNO analysis.  
33  
34  
35  
36  
37

38  
39 We obtained continuously recorded data for 2006-2007 for NO<sub>2</sub>, PM<sub>10</sub>, PM<sub>2.5</sub> from two air  
40 quality monitors sited in elevated positions near the ventilation stacks and established by the  
41 tunnel proponents for statutory purposes.[21]  
42  
43  
44  
45  
46

#### 47 **Wind direction**

48  
49 Wind direction for each field day was determined using meteorological forecasts from the  
50 Bureau of Meteorology and by releasing slightly buoyant balloons filled with a mixture of air  
51 and helium from an elevated location near the western stack.  
52  
53  
54  
55  
56  
57  
58  
59  
60

1  
2  
3 To validate our choice of testing sites, wind speed and direction data were obtained from  
4  
5 three air quality monitoring stations located near the western ventilation stack, including the  
6  
7 elevated site mentioned above. The other two were ground level stations, operated for all  
8  
9 three study years. We constructed wind roses for the three monitoring sites using Lakes  
10  
11 Environmental WRPlot View (version 6.5.1).  
12  
13

14  
15  
16 Post-hoc validation of assignment of downwind and upwind study sites for each testing day  
17  
18 was checked using wind rose data. Where the chosen locations were within  $\pm 45$  degrees of  
19  
20 the measured downwind or upwind direction, they were deemed to be accurate downwind or  
21  
22 upwind locations, respectively. This validation was used in the sensitivity analysis. Data for  
23  
24 the heavily trafficked site (north or south side of the road) were included in the sensitivity  
25  
26 analysis in the same way. Data were also excluded where wind speed was  $<1\text{m/sec}$ .  
27  
28  
29  
30  
31

## 32 **Analysis**

### 33 *Health outcomes*

34  
35 The distributions of eNO were skewed and so these values were log-transformed. All other  
36  
37 dependent variables were analysed without transformation.  
38  
39  
40  
41  
42

43 Principal components analysis (PCA) was conducted to reduce the 14 symptom scores to five  
44  
45 factors which were found to explain 77% of the overall variance. The scree plot suggested  
46  
47 that this was the optimum number of factors. Hence, a five factor structure was fitted with  
48  
49 varimax rotation using data for all three years. The five factor scores were output for each  
50  
51 observation and these were used as continuous measures of symptom intensity. The five  
52  
53 symptom factors were 1) itchy/dry/sore eyes and blocked nose (EYE); 2) sore/dry throat, sore  
54  
55 chest and runny nose (THROAT); 3) chest tightness, difficulty breathing (CHEST); 4)  
56  
57  
58  
59  
60

1  
2  
3 sneezing, cough, watery eyes; (SNEEZE) and, 5) dry nose symptoms (DRY NOSE). The  
4  
5 distributions of VAS scores for “strong smell” and “annoying smell” were highly skewed and  
6  
7 included a large proportion of zero values, and so were treated as binary outcomes: zero  
8  
9 (“no”) and greater than zero (“yes”).  
10

11  
12  
13  
14 To estimate the air pollutant means we first calculated the daily means for each pollutant, and  
15  
16 then calculated the mean pollutant level by location and year.  
17  
18

19  
20  
21 We analysed the data using an ‘intention to treat’ approach, based on the locations chosen for  
22  
23 each group for each field testing session. Data for timepoint\_0 were excluded from the main  
24  
25 analyses based on the assumption that exposure had not started when that measurement was  
26  
27 made. We used a mixed effects linear regression model in which the fixed effects were  
28  
29 location (upwind, downwind, control) and year (2006, 2007, 2008), and used contrast  
30  
31 statements to test specific interactions between them. We also used contrast statements to  
32  
33 estimate the overall difference (averaged over all years) in effect between the heavily  
34  
35 trafficked location and the upwind and downwind locations combined. Since we expected  
36  
37 that health outcomes would be worse at the heavily trafficked site, this served as a validation  
38  
39 of the design. We included a random intercept term for subjects, with a variance components  
40  
41 covariance structure, to account for repeated measures within subjects. Spirometric outcomes,  
42  
43 eNO and the five symptom factors were separately included as outcome variables.  
44  
45

46  
47 Significance of the fixed effects was tested using F tests. Least squares means were estimated  
48  
49 for each combination of year and location. Analyses were conducted using SAS Version 9.2  
50  
51 PROC MIXED procedures.  
52  
53  
54  
55  
56  
57  
58  
59  
60

1  
2  
3 The binary variables “strong smell” and “annoying smell” were treated identically except that  
4  
5 a generalised linear mixed model was fitted with Proc GLIMMIX using the adaptive  
6  
7 quadrature estimation method, a logistic link and a binomial error distribution in SAS version  
8

9  
10 9.2. [Examination of the distribution of residuals indicated that there were no major departures](#)  
11 [from normality and transformation of the data was not required.](#)  
12  
13

### 14 15 *Air pollutant concentrations*

16  
17 We used a similar mixed effects linear regression model with contrast statements, to test the  
18  
19 effects of location and year, and their interaction, on air pollutant measurements (NO<sub>x</sub>, NO<sub>2</sub>,  
20  
21 PM<sub>10</sub>, PM<sub>2.5</sub>, and PM<sub>1</sub>), excluding VOCs where there were too few readings. A random  
22  
23 intercept term for days was used to account for repeated measures. We conducted a  
24  
25 sensitivity analysis for the air quality data by re-fitting the models using data that were  
26  
27 validated using the wind-rose method, as described earlier.  
28  
29  
30  
31

32  
33 For the elevated monitor data, we used an autoregressive error model with Yule-Walker  
34  
35 estimates and stepwise regression to determine whether there was a difference in air quality  
36  
37 between 2006 (pre tunnel) and 2007 (post-tunnel opening), by comparing daily averages for  
38  
39 the two years. We adjusted this analysis for changes in regional air quality measured at three  
40  
41 regulatory monitoring stations operated by the Department of Environment, Climate Change  
42  
43 and Water (DECCW), including as a covariate the change in average daily readings from the  
44  
45 DECCW sites combined. We tested up to 20 lags, residuals were plotted to check for  
46  
47 normality, and the autocorrelation function (ACF) and partial autocorrelation function  
48  
49 (PACF) were checked for autocorrelation. These models were implemented in SAS 9.2 using  
50  
51 the AUTOREG procedure.  
52  
53  
54  
55  
56  
57  
58  
59  
60

### Sample size and power calculation

The sample size for this study (36 subjects) was selected by reference to a study conducted in London that was able to detect significant within-subject differences in lung function in 60 subjects exposed to a high pollution area and a low pollution area [5], noting that our study had a greater number of repeated measures.

## RESULTS

In 2006, 25% of the 36 participants reported having had a diagnosis of asthma and 42% reported having had wheeze, including 25% who had wheeze in the last three months (Table 1). The majority of participants were atopic. Of the 36 subjects who started the study in 2006, 26 (72%) participated in 2007 and 20 (56%) in 2008. Whilst the cohort characteristics remained relatively stable between 2006 and 2007, in 2008 the remaining cohort was less symptomatic in the three months prior to 2008 field testing (Table 1, Supplementary Material).

### Health Outcomes

FEV<sub>1</sub> and FVC were similar across locations, but were generally higher in 2006 compared to 2007 or 2008 (Table 2). Mean values for eNO were highest at the heavily trafficked (positive control) location for all years except for 2008 and did not differ between the downwind and upwind locations. EYE, THROAT and CHEST symptom scores were highest at the heavily trafficked location compared to the downwind or upwind locations during all years, with one exception (Table 2).

There was little evidence that the downwind locations, when compared with the heavily trafficked or upwind locations, were associated with adverse health outcomes in 2007 or 2008, compared to 2006 (Table 3). The only exception was that changes in DRY NOSE scores were higher for downwind vs heavily trafficked locations. Downwind locations were associated with a decrease in reporting of chest symptoms for almost all year comparisons.

**Table 1. Baseline characteristics as measured at recruitment in 2006**

| Symptom/characteristic                                        | N (%)                 |
|---------------------------------------------------------------|-----------------------|
| Total number of subjects                                      | 36 (100)              |
| Asthma (ever diagnosis)                                       | 9 (25)                |
| Ever wheezed                                                  | 15 (42)               |
| Wheeze (in last 3 mths)                                       | 9 (25)                |
| Breathless (in last 3 mths)                                   | 4 (11)                |
| Cough (in last 3 mths)                                        | 20 (56)               |
| Activities limited (in last 3 mths)                           | 3 (8)                 |
| Ever taken asthma medication                                  | 15 (42)               |
| Asthma medication (in last 3 mths)                            | 8 (22)                |
| Inhaled steroids (in last 3 mths) <sup>a</sup>                | 6 (17)                |
| Sensitive eyes <sup>b</sup>                                   | 12 (33)               |
| Eye symptoms (in last 3 mths without a cold/flu) <sup>c</sup> | 14 (39)               |
| Nose symptoms (in last 3 mths without a cold/flu)             | 18 (50)               |
| Throat symptoms (in last 3 mths without a cold/flu)           | 10 (28)               |
| Mouth symptoms (in last 3 mths (soreness of gums or teeth))   | 13 (36)               |
| Atopic <sup>d</sup>                                           | 26 (72)               |
| Female                                                        | 25 (69)               |
| <b>Spirometry &amp; chemical sensitivity score</b>            |                       |
| FEV <sub>1</sub> (L)                                          | Mean (SD) 2.99 (0.94) |
| FVC (L)                                                       | 3.78 (1.11)           |
| eNO (ppb)                                                     | 11.1 (12.1)           |
| Chemical sensitivity scale score (CSS)[17]                    | 36.3 (8.7)            |

<sup>a</sup> Inhaled steroids=having taken either seretide or pulmicort

<sup>b</sup> Question: Do you usually regard your eyes as being sensitive to cigarette smoke, smog, air conditioning or central heating?



1  
2  
3  
4  
5  
6  
7  
8  
9  
10  
11  
12  
13  
14  
15  
16  
17  
18  
19  
20  
21  
22  
23  
24  
25  
26  
27  
28  
29  
30  
31  
32  
33  
34  
35  
36  
37  
38  
39  
40  
41  
42  
43  
44  
45  
46  
47  
48  
49  
50  
51  
52  
53  
54  
55  
56  
57  
58  
59  
60

- c Question: Have you had any of the following eye symptoms in the last 3 mths, when you did not have a cold or flu (eye redness, burning feeling, scratchiness, grittiness, dryness, watery eyes)?
- d Any allergen SPT  $\geq$  3mm

For peer review only

Table 2. Mean (SD) values for lung function and symptom scores by location and year

| Location           | Year    | No. of obs <sup>a</sup> | FEV <sub>1</sub> (L) | FVC (L)     | eNO (ppb) (median) | EYE symptoms score* | THROAT symptoms score* | CHEST symptoms score* | SNEEZE symptoms score* | DRY NOSE symptoms score* |
|--------------------|---------|-------------------------|----------------------|-------------|--------------------|---------------------|------------------------|-----------------------|------------------------|--------------------------|
| Heavily trafficked | Average | 463                     | 2.72 (0.80)          | 3.64 (1.00) | 17.6 (13.0)        | -0.048 (0.714)      | 0.052 (1.187)          | 0.120 (1.098)         | 0.351 (1.590)          | -0.158 (1.076)           |
|                    | 2006    | 208                     | 2.84 (0.81)          | 3.70 (1.00) | 15.2 (12.1)        | -0.022 (0.881)      | 0.120 (1.146)          | 0.095 (1.120)         | 0.059 (1.153)          | 0.086 (1.146)            |
|                    | 2007    | 156                     | 2.67 (0.83)          | 3.62 (1.01) | 24.34 (14.4)       | -0.054 (0.587)      | 0.108 (1.305)          | 0.137 (1.084)         | 0.547 (1.929)          | -0.409 (1.003)           |
|                    | 2008    | 99                      | 2.58 (0.69)          | 3.53 (0.89) | 12.2 (6.6)         | -0.092 (0.467)      | -0.182 (1.049)         | 0.143 (1.082)         | 0.651 (1.692)          | -0.268 (0.923)           |
| Downwind           | Average | 461                     | 2.68 (0.79)          | 3.62 (0.99) | 15.2 (10.9)        | -0.033 (0.840)      | -0.012 (0.962)         | -0.071 (0.874)        | 0.365 (1.867)          | -0.248 (1.025)           |
|                    | 2006    | 207                     | 2.81 (0.84)          | 3.73 (1.05) | 12.8 (9.5)         | 0.033 (1.073)       | -0.031 (0.873)         | -0.054 (0.907)        | -0.005 (0.867)         | -0.139 (0.933)           |
|                    | 2007    | 143                     | 2.57 (0.73)          | 3.53 (0.95) | 21.3 (12.9)        | -0.139 (0.414)      | 0.010 (1.043)          | -0.023 (0.720)        | 0.663 (2.422)          | -0.264 (1.155)           |
|                    | 2008    | 111                     | 2.59 (0.74)          | 3.55 (0.90) | 12.5 (7.5)         | -0.024 (0.728)      | -0.002 (1.024)         | -0.163 (0.984)        | 0.688 (2.289)          | -0.432 (0.997)           |
| Upwind             | Average | 447                     | 2.68 (0.81)          | 3.61 (0.95) | 15.7 (11.4)        | -0.042 (0.801)      | -0.065 (0.980)         | -0.015 (1.045)        | 0.159 (1.264)          | -0.113 (1.046)           |
|                    | 2006    | 204                     | 2.79 (0.83)          | 3.69 (0.97) | 13.5 (10.3)        | -0.013 (1.039)      | -0.090 (0.958)         | -0.040 (0.961)        | -0.056 (0.964)         | 0.060 (0.891)            |
|                    | 2007    | 138                     | 2.63 (0.82)          | 3.57 (0.96) | 20.9 (13.2)        | -0.048 (0.545)      | 0.022 (1.141)          | 0.020 (1.317)         | 0.409 (1.529)          | -0.161 (1.313)           |
|                    | 2008    | 105                     | 2.54 (0.73)          | 3.50 (0.88) | 12.7 (7.6)         | -0.087 (0.544)      | -0.135 (0.757)         | -0.015 (0.745)        | 0.220 (1.305)          | -0.374 (0.834)           |

\* EYE symptoms: Itchy/dry/sore eyes and blocked nose  
 THROAT symptoms: Sore/dry throat, sore chest & runny nose  
 CHEST symptoms: Chest tightness, difficulty breathing  
 SNEEZE symptoms: Sneezing, cough, watery eyes  
 DRY NOSE symptoms: Dry nose

<sup>a</sup> Number of observations for FEV<sub>1</sub> provided, as observations varied slightly with health outcomes measured.

Table 3. Contrasts\* in lung function, eNO and symptom scores between the downwind site and the other two sites (upwind and Heavily trafficked) adjusted for change from baseline (2006) to subsequent years

| Contrast <sup>a</sup>                                    |                              | FEV1<br>(diff in litres)<br>(95% CI) | FVC<br>(diff in litres)<br>(95% CI) | eNO<br>Ratio<br>(95% CI) | EYE symptoms<br>(diff in score)<br>(95% CI) | THROAT symptoms<br>(diff in score)<br>(95% CI) |
|----------------------------------------------------------|------------------------------|--------------------------------------|-------------------------------------|--------------------------|---------------------------------------------|------------------------------------------------|
| Location                                                 | Year                         |                                      |                                     |                          |                                             |                                                |
| Downwind vs (Heavily trafficked and Upwind) <sup>b</sup> | 2007/08 vs 2006 <sup>c</sup> | 0.01 (-0.04-0.06)                    | 0.03 (-0.03-0.09)                   | 1.03 (0.94-1.12)         | -0.006 (-0.097-0.086)                       | 0.130 (-0.084-0.344)                           |
|                                                          | 2007 vs 2006                 | 0.03 (-0.03-0.09)                    | 0.05 (-0.03-0.13)                   | 1.01 (0.91-1.11)         | -0.055 (-0.159-0.049)                       | 0.041 (-0.220-0.301)                           |
|                                                          | 2008 vs 2006                 | -0.004 (-0.07-0.06)                  | 0.02 (-0.07-0.10)                   | 1.05 (0.94-1.17)         | 0.043 (-0.074-0.159)                        | 0.207 (-0.027-0.441)                           |
| Downwind vs Upwind                                       | 2007/08 vs 2006 <sup>c</sup> | 0.02 (-0.04-0.08)                    | 0.06 (-0.02-0.13)                   | 1.03 (0.93-1.14)         | -0.044 (-0.151-0.063)                       | 0.080 (-0.169-0.329)                           |
|                                                          | 2007 vs 2006                 | 0.04 (-0.03-0.11)                    | 0.06 (-0.03-0.15)                   | 1.05 (0.94-1.17)         | -0.108 (-0.229-0.012)                       | -0.006 (-0.308-0.297)                          |
|                                                          | 2008 vs 2006                 | 0.004 (-0.07-0.08)                   | 0.06 (-0.04-0.15)                   | 1.01 (0.89-1.15)         | 0.015 (-0.120-0.149)                        | 0.179 (-0.092-0.449)                           |
| Downwind vs Heavily trafficked                           | 2007/08 vs 2006 <sup>c</sup> | -0.00 (-0.06-0.06)                   | 0.004 (-0.07-0.08)                  | 1.03 (0.93-1.14)         | 0.033 (-0.073-0.140)                        | 0.180 (-0.068-0.428)                           |
|                                                          | 2007 vs 2006                 | 0.02 (-0.05-0.09)                    | 0.04 (-0.05-0.12)                   | 0.97 (0.87-1.08)         | -0.002 (-0.121-0.117)                       | 0.087 (-0.212-0.385)                           |
|                                                          | 2008 vs 2006                 | -0.01 (-0.09-0.06)                   | -0.03 (-0.12-0.07)                  | 1.09 (0.96-1.23)         | 0.071 (-0.065-0.206)                        | 0.236 (-0.038-0.509)                           |
| Heavily trafficked vs (Upwind and Downwind) <sup>d</sup> | Overall                      | -0.01 (-0.04-0.01)                   | -0.03 (-0.06-0.002)                 | 1.09 (1.04-1.14)         | 0.054 (0.006-0.102)                         | 0.107 (-0.005-0.218)                           |

| Contrast <sup>a</sup>                                          |                              | CHEST symptoms              | SNEEZE symptoms             | DRY NOSE symptoms           | SMELL-STRONG           | SMELL-ANNOYING         |
|----------------------------------------------------------------|------------------------------|-----------------------------|-----------------------------|-----------------------------|------------------------|------------------------|
| Location                                                       | Year                         | (diff in score)<br>(95% CI) | (diff in score)<br>(95% CI) | (diff in score)<br>(95% CI) | Odds ratio<br>(95% CI) | Odds ratio<br>(95% CI) |
| Downwind vs<br>(Heavily trafficked and<br>Upwind) <sup>b</sup> | 2007/08 vs 2006 <sup>c</sup> | -0.080 (-0.302-0.142)       | 0.288 (-0.139-0.716)        | 0.276 (0.040-0.511)         | 3.45 (1.57-7.60)       | 1.69 (0.72-3.96)       |
|                                                                | 2007 vs 2006                 | -0.031 (-0.277-0.214)       | 0.375 (-0.093-0.844)        | 0.320 (0.053-0.587)         | 5.72 (2.35-13.91)      | 1.95 (0.77-4.94)       |
|                                                                | 2008 vs 2006                 | -0.133 (-0.409-0.143)       | 0.182 (-0.254-0.618)        | 0.229 (-0.057-0.516)        | 2.14 (0.77-5.97)       | 1.33 (0.44-4.00)       |
| Downwind vs Upwind                                             | 2007/08 vs 2006 <sup>c</sup> | -0.017 (-0.275-0.242)       | 0.430 (-0.067-0.927)        | 0.193 (-0.081-0.466)        | 3.51 (1.40-8.80)       | 1.23 (0.45-3.40)       |
|                                                                | 2007 vs 2006                 | 0.033 (-0.252-0.318)        | 0.422 (-0.123-0.966)        | 0.187 (-0.124-0.498)        | 4.11 (1.48-11.43)      | 1.12 (0.38-3.37)       |
|                                                                | 2008 vs 2006                 | -0.042 (-0.362-0.277)       | 0.424 (-0.080-0.929)        | 0.178 (-0.154-0.510)        | 3.31 (0.98-11.18)      | 1.26 (0.34-4.71)       |
| Downwind vs Heavily<br>trafficked                              | 2007/08 vs 2006 <sup>c</sup> | -0.143 (-0.400-0.114)       | 0.147 (-0.349-0.642)        | 0.358 (0.086-0.631)         | 3.39 (1.39-8.29)       | 2.31 (0.90-5.94)       |
|                                                                | 2007 vs 2006                 | -0.096 (-0.377-0.185)       | 0.329 (-0.208-0.866)        | 0.453 (0.146-0.759)         | 7.96 (2.89-21.93)      | 3.38 (1.20-9.54)       |
|                                                                | 2008 vs 2006                 | -0.224 (-0.547-0.099)       | -0.060 (-0.570-0.450)       | 0.281 (-0.054-0.617)        | 1.38 (0.44-4.40)       | 1.40 (0.41-4.75)       |
| Heavily trafficked vs<br>(Upwind and<br>Downwind) <sup>d</sup> | Overall                      | 0.209 (0.094-0.325)         | 0.150 (-0.072-0.372)        | 0.022 (-0.101-0.144)        | 2.34 (1.58-3.49)       | 4.08 (2.67-6.25)       |

<sup>a</sup> Contrasts are derived from mixed effects regression model in which location and year, and the interaction between them are fixed effects, and individual subject intercepts are a random effect. Main contrasts of interest are those included in the table and consist of downwind versus other exposures, as the downwind exposure is the primary exposure of interest in this study.

<sup>b</sup> Downwind vs (heavily trafficked and upwind) is the comparison of downwind versus heavily trafficked and upwind exposures combined.

<sup>c</sup> 2007/08 vs 2006 represents the comparison of both post-tunnel years combined (2007/08) versus the pre-tunnel year (2006).

<sup>d</sup> Represents the overall comparison of the heavily trafficked site compared to the upwind and downwind sites combined (data from all years included), as we anticipated the heavily trafficked site to have higher air pollution levels and that health effects would be more prominent.

1  
2  
3  
4 Over the three year period as a whole, exposure at the heavily trafficked locations, compared with  
5  
6 both the downwind and upwind stack locations, was associated with more airway  
7  
8 inflammation (eNO) (ratio=1.09), and higher scores for EYE, CHEST, and THROAT symptoms  
9  
10 (last row, Table 3). These findings support the validity of the study design and analysis.  
11  
12

13  
14  
15 The change in “smell\_strong” from 2006 to subsequent years was higher for downwind locations  
16  
17 than the other two locations (Table 3). However, in general this pattern was not observed for  
18  
19 “smell-annoying”. Overall, both “smell-strong” and “smell-annoying” were higher at the heavily  
20  
21 trafficked locations than the two stack locations (last row, Table 3).  
22  
23

#### 24 25 26 *Sensitivity analysis for health outcomes* 27

28 In the sensitivity analysis we excluded data which might have led to exposure misclassification  
29  
30 due to unexpected wind direction, as described earlier. Data for: 5 “downwind” sites in 2006 and  
31  
32 2 in 2008; for 2 “upwind” sites in 2006 and 2 in 2008; and for one heavily trafficked site in 2006;  
33  
34 were excluded.  
35  
36

37  
38  
39 In this analysis FVC was increased for downwind locations vs the other two locations, for most  
40  
41 year comparisons (Table 2, Supplementary Material). FEV<sub>1</sub> was also increased for downwind vs  
42  
43 heavily trafficked locations. Conversely, eNO was higher at downwind compared to upwind  
44  
45 locations for 2007 vs 2006. The increased odds of “smell-strong” at downwind locations did not  
46  
47 differ to the other locations in the sensitivity analysis. Overall, eNO levels, CHEST symptoms,  
48  
49 “smell-strong” and “smell-annoying” were higher at the heavily trafficked locations compared to  
50  
51 upwind or downwind locations, confirming the findings of the intention-to-treat analysis (Table  
52  
53 2, Supplementary Material).  
54  
55  
56  
57  
58  
59  
60

### Air pollutant levels

As expected, the concentrations of all pollutants were higher at the heavily trafficked sites than the upwind or downwind sites. However, there was little difference in mean pollutant levels between the downwind and upwind locations around the ventilation stack (Table 4 and Table 3, Supplementary Material). NO<sub>x</sub> and NO<sub>2</sub> ratios were lower for the downwind sites than the other two sites for 2007 vs 2006. In contrast, the NO<sub>2</sub> ratio for 2008 vs 2006 was higher at the downwind sites than at the heavily trafficked sites (Table 5). The change in PM (for all size fractions) from 2006 to subsequent years did not vary by site. Overall, the change in pollutants was greatest at the heavily trafficked sites compared to the upwind and downwind sites combined.

In the sensitivity analysis the pollutant ratios for downwind locations compared to upwind locations increased for most pollutants supporting the validity of the exclusion criteria (Table 4, Supplementary Material).

NO<sub>2</sub> and PM<sub>10</sub> decreased at the western and eastern elevated monitoring sites between 2006 and 2007, after adjusting for changes in regional air quality (Table 6).

Table 4. Mean pollutant levels by location (2006-2008 overall)

| Pollutant                                    | Location           | Sample days | Samples | Mean <sup>a</sup> | Median <sup>a</sup> | IQR        | Min  | Max   |
|----------------------------------------------|--------------------|-------------|---------|-------------------|---------------------|------------|------|-------|
| <b><u>Nitrogen oxides</u><sup>b</sup></b>    |                    |             |         |                   |                     |            |      |       |
| <b>NO<sub>x</sub></b>                        | Heavily trafficked | 18          | 157     | 126.2             | 95.2                | 28.1-133.1 | 7.9  | 650.7 |
|                                              | Downwind           | 18          | 159     | 23.9              | 16.2                | 8.0-38.5   | 3.5  | 66.3  |
|                                              | Upwind             | 18          | 150     | 26.2              | 15.8                | 8.6-32.8   | 3.6  | 84.4  |
| <b>NO<sub>2</sub></b>                        | Heavily trafficked | 18          | 160     | 6.1               | 3.8                 | 1.2-5.7    | -2.3 | 27.8  |
|                                              | Downwind           | 18          | 159     | 3.1               | 2.3                 | 1.2-4.2    | 0.8  | 9.4   |
|                                              | Upwind             | 18          | 151     | 3.1               | 1.8                 | 1.4-4.5    | 0.6  | 10.4  |
| <b><u>Particulate matter</u><sup>c</sup></b> |                    |             |         |                   |                     |            |      |       |
| <b>PM<sub>10</sub></b>                       | Heavily trafficked | 17          | 1034    | 52.6              | 45.1                | 35.4-64.2  | 28.3 | 108.5 |
|                                              | Downwind           | 17          | 1099    | 41.9              | 33.5                | 29.7-49.9  | 17.1 | 90.4  |
|                                              | Upwind             | 17          | 1087    | 45.9              | 35.2                | 25.4-49.5  | 16.7 | 132.8 |
| <b>PM<sub>2.5</sub></b>                      | Heavily trafficked | 17          | 1034    | 13.0              | 13.9                | 9.6-16.5   | 4.2  | 20.0  |
|                                              | Downwind           | 17          | 1099    | 11.0              | 10.4                | 7.9-13.5   | 1.5  | 19.7  |
|                                              | Upwind             | 17          | 1087    | 11.7              | 10.6                | 9.2-13.4   | 1.7  | 28.5  |
| <b>PM<sub>1</sub></b>                        | Heavily trafficked | 17          | 1034    | 2.4               | 2.5                 | 1.9-3.0    | 1.1  | 3.4   |
|                                              | Downwind           | 17          | 1099    | 1.9               | 1.9                 | 1.5-2.3    | 0.3  | 3.2   |
|                                              | Upwind             | 17          | 1087    | 2.0               | 2.0                 | 1.5-2.4    | 0.5  | 5.1   |
| <b><u>VOCs</u><sup>d</sup></b>               |                    |             |         |                   |                     |            |      |       |
| <b>Benzene</b>                               | Heavily trafficked | 12          | 12      | 0.86              | 0.86                | 0.44-1.07  | 0.35 | 1.7   |
|                                              | Downwind           | 12          | 12      | 0.39              | 0.37                | 0.18-0.55  | 0.16 | 0.75  |
|                                              | Upwind             | 12          | 12      | 0.37              | 0.27                | 0.23-0.49  | 0.13 | 0.87  |
| <b>Butadiene</b>                             | Heavily trafficked | 12          | 12      | 0.25              | 0.25                | 0.11-0.33  | 0.04 | 0.59  |
|                                              | Downwind           | 12          | 12      | 0.11              | 0.11                | 0.04-0.18  | 0.04 | 0.24  |
|                                              | Upwind             | 12          | 12      | 0.11              | 0.09                | 0.07-0.16  | 0.04 | 0.30  |
| <b>Toluene</b>                               | Heavily trafficked | 10          | 10      | 5.25              | 4.60                | 2.60-6.80  | 1.50 | 10.80 |
|                                              | Downwind           | 10          | 10      | 2.61              | 2.55                | 2.20-3.00  | 1.40 | 3.90  |
|                                              | Upwind             | 10          | 10      | 3.58              | 3.55                | 2.30-4.00  | 1.20 | 7.00  |
| <b>Ethylbenzene</b>                          | Heavily trafficked | 12          | 12      | 0.66              | 0.59                | 0.29-1.02  | 0.15 | 1.70  |
|                                              | Downwind           | 12          | 12      | 0.45              | 0.38                | 0.21-0.60  | 0.09 | 1.50  |
|                                              | Upwind             | 12          | 12      | 0.51              | 0.36                | 0.22-0.46  | 0.09 | 1.90  |

| Pollutant        | Location           | Sample days | Samples | Mean <sup>a</sup> | Median <sup>a</sup> | IQR       | Min  | Max  |
|------------------|--------------------|-------------|---------|-------------------|---------------------|-----------|------|------|
| <b>mp-xylene</b> | Heavily trafficked | 12          | 12      | 2.43              | 1.70                | 0.81-3.31 | 0.55 | 7.70 |
|                  | Downwind           | 12          | 12      | 1.25              | 1.35                | 0.49-1.70 | 0.28 | 2.80 |
|                  | Upwind             | 12          | 12      | 1.22              | 0.88                | 0.46-1.60 | 0.30 | 4.00 |
| <b>o-xylene</b>  | Heavily trafficked | 12          | 12      | 0.90              | 0.70                | 0.34-1.23 | 0.22 | 2.70 |
|                  | Downwind           | 12          | 12      | 0.50              | 0.52                | 0.19-0.77 | 0.13 | 1.10 |
|                  | Upwind             | 12          | 12      | 0.49              | 0.37                | 0.21-0.64 | 0.10 | 1.60 |

<sup>a</sup> Means and medians calculated by taking the mean of daily averages at each site. IQR, minimum and maximum values using all (not averaged) data.

<sup>b</sup> Grab sample for NO<sub>2</sub> and NO<sub>x</sub> collected at each site every 15 min and averaged per two hr exposure period.

<sup>c</sup> PM data collected every two min.

<sup>d</sup> One sample collected at site providing an average VOC reading per two hr exposure period. 2007 data not used in analysis due to different detection limits used by different laboratory. 95<sup>th</sup> percentile not reported for VOCs as sample size too small; 95<sup>th</sup> percentile equivalent to maximum reading.



1  
2  
3  
4  
5  
6  
7  
8  
9  
10  
11  
12  
13  
14  
15  
16  
17  
18  
19  
20  
21  
22  
23  
24  
25  
26  
27  
28  
29  
30  
31  
32  
33  
34  
35  
36  
37  
38  
39  
40  
41  
42  
43  
44  
45  
46  
47  
48  
49

**Table 5. Ratios of pollutant levels<sup>a</sup> contrasting the downwind site and the other two sites (upwind and heavily trafficked) adjusted for change from baseline (2006) to subsequent years**

| Contrast                                                 |                             | NO <sub>x</sub> ratio<br>(95% CI) | NO <sub>2</sub> ratio<br>(95% CI) | PM <sub>10</sub> ratio<br>(95% CI) | PM <sub>2.5</sub> ratio<br>(95% CI) | PM <sub>1</sub> ratio<br>(95% CI) |
|----------------------------------------------------------|-----------------------------|-----------------------------------|-----------------------------------|------------------------------------|-------------------------------------|-----------------------------------|
| Location                                                 | Year                        |                                   |                                   |                                    |                                     |                                   |
| Downwind vs (Heavily trafficked and Upwind) <sup>b</sup> | 2007/8 vs 2006 <sup>c</sup> | 0.78 (0.61-0.99)                  | 0.77 (0.59-1.00)                  | 1.10 (0.66-1.81)                   | 1.09 (0.55-2.16)                    | 1.06 (0.58-1.93)                  |
|                                                          | 2007 vs 2006                | 0.59 (0.44-0.80)                  | 0.49 (0.38-0.63)                  | 1.18 (0.61-2.28)                   | 1.04 (0.42-2.58)                    | 0.98 (0.44-2.17)                  |
|                                                          | 2008 vs 2006                | 1.02 (0.77-1.35)                  | 1.20 (0.88-1.64)                  | 1.02 (0.56-1.85)                   | 1.14 (0.67-1.94)                    | 1.14 (0.70-1.87)                  |
| Downwind vs Upwind                                       | 2007/8 vs 2006 <sup>c</sup> | 0.84 (0.64-1.12)                  | 0.63 (0.46-0.86)                  | 1.16 (0.65-2.07)                   | 1.10 (0.50-2.41)                    | 1.04 (0.52-2.07)                  |
|                                                          | 2007 vs 2006                | 0.72 (0.51-1.02)                  | 0.52 (0.39-0.71)                  | 1.16 (0.54-2.48)                   | 1.09 (0.38-3.09)                    | 1.02 (0.41-2.55)                  |
|                                                          | 2008 vs 2006                | 0.99 (0.71-1.37)                  | 0.76 (0.53-1.09)                  | 1.16 (0.58-2.30)                   | 1.11 (0.60-2.04)                    | 1.06 (0.60-1.87)                  |
| Downwind vs Heavily trafficked                           | 2007/8 vs 2006 <sup>c</sup> | 0.72 (0.55-0.94)                  | 0.93 (0.68-1.27)                  | 1.04 (0.58-1.86)                   | 1.09 (0.50-2.39)                    | 1.08 (0.54-2.16)                  |
|                                                          | 2007 vs 2006                | 0.49 (0.35-0.69)                  | 0.46 (0.34-0.61)                  | 1.20 (0.56-2.57)                   | 1.00 (0.35-2.85)                    | 0.94 (0.38-2.36)                  |
|                                                          | 2008 vs 2006                | 1.05 (0.76-1.45)                  | 1.90 (1.33-2.72)                  | 0.89 (0.45-1.78)                   | 1.18 (0.64-2.18)                    | 1.24 (0.70-2.19)                  |
| Heavily trafficked vs (Upwind and Downwind) <sup>d</sup> | Overall                     | 4.08 (3.64-4.57)                  | 1.45 (1.28-1.65)                  | 1.27 (1.00-1.62)                   | 1.21 (0.87-1.68)                    | 1.31 (0.99-1.75)                  |

<sup>a</sup> Ratios are derived from a mixed effects regression model in which location and year, and the interaction between them are fixed effects, and individual intercepts are a random effect. Main contrasts of interest are those included in the table and consist of downwind versus other exposures, as the downwind exposure is the primary exposure of interest in this study.

<sup>b</sup> Downwind vs (heavily trafficked and upwind) is the comparison of downwind versus heavily trafficked and upwind exposures combined.

<sup>c</sup> 2007/08 vs 2006 represents the comparison of both post-tunnel years combined (2007/08) versus the pre-tunnel year (2006).

<sup>d</sup> Represents the overall comparison of the heavily trafficked site compared to the two stack sites (downwind and upwind) combined, (data from all years included).

**Table 6. Mean pollutant concentrations for elevated monitors by year and difference in pollutant concentration from post-tunnel year compared to pre-tunnel year**

| Site & pollutant                                    | Mean pollutant levels (SD) |             | Difference in pollutant levels<br>2007 vs 2006 <sup>a</sup> |                                            |
|-----------------------------------------------------|----------------------------|-------------|-------------------------------------------------------------|--------------------------------------------|
|                                                     | 2006                       | 2007        | Unadjusted estimate<br>(95% CI)                             | Adjusted estimate<br>(95% CI) <sup>b</sup> |
| <i>Elevated site near western ventilation stack</i> |                            |             |                                                             |                                            |
| NO <sub>2</sub> ppb                                 | 13.4 (5.6)                 | 12.1 (4.5)  | -1.93 (-3.06, -0.80)                                        | -1.06 (-1.67, -0.44)                       |
| NO <sub>x</sub> ppb                                 | 26.1 (19.9)                | 20.6 (14.6) | -5.97 (-11.20, -0.74)                                       | -2.74 (-4.42 to -1.06)                     |
| PM <sub>10</sub> µg/m <sup>3</sup>                  | 18.7 (7.4)                 | 16.2 (7.0)  | -2.40 (-4.23, -0.57)                                        | -0.45 (-1.95, 1.04)                        |
| PM <sub>2.5</sub> µg/m <sup>3</sup>                 | 6.2 (3.5)                  | 5.3 (3.3)   | -1.01 (-2.27, 0.25)                                         | -0.20 (-0.66, 0.27)                        |
| <i>Elevated site near eastern ventilation stack</i> |                            |             |                                                             |                                            |
| NO <sub>2</sub> ppb                                 | 16.7 (7.0)                 | 15.7 (5.3)  | -2.50 (-4.41, -0.60)                                        | -0.99 (-2.21, 0.23)                        |
| NO <sub>x</sub> ppb                                 | 30.7 (17.8)                | 27.1 (14.1) | -6.28 (-10.93, -1.62)                                       | -2.05 (-2.91, -1.20)                       |
| PM <sub>10</sub> µg/m <sup>3</sup>                  | 20.2 (8.1)                 | 16.1 (6.8)  | -4.02 (-6.24, -1.80)                                        | -1.75 (-3.05, -0.44)                       |
| PM <sub>2.5</sub> µg/m <sup>3</sup>                 | 6.4 (3.6)                  | 5.3 (3.2)   | -1.14 (-2.40, 0.11)                                         | -0.26 (-0.65, 0.12)                        |

- a. Represents the change in pollutant concentration between pre-tunnel (25 Mar 06-24 Mar 07) and post-tunnel (25 Mar 2007-24 Mar 2008)
- b. Adjusted for change in air quality at the 3 regional sites

## DISCUSSION

We did not detect any consistent evidence of detrimental effects on lung function, airway inflammation or respiratory symptoms attributable to short-term exposure to emissions from the tunnel ventilation stack with the exception of increased reporting of dry nose symptoms. This absence of any adverse health effect might be explained by the fact that we did not measure higher pollutant concentrations at the downwind stack sites after the tunnel opened. The finding of increased pollutant levels and increased symptoms and airway inflammation during periods of exposure at the heavily trafficked site supports previous evidence of the detrimental effects of short-term exposures to TRAP.

This study relied on the proposition that the downwind sites we selected were, in fact, exposed to emissions from the tunnel ventilation stack during peak traffic periods. For a downwind site to be impacted by the emission plume from the stack the plume needed to be mixed at ground level prior to reaching the site and subjected to consistent wind direction during the sampling period. We used weather balloons early on each study morning in order to select the most appropriate downwind site. ~~However, it is possible that we were not always able to accurately predict the ground level location of the plume. Compared to the upwind locations, pollutant concentrations at the downwind locations were similar, or sometimes slightly lower. This may have reflected actual conditions in the field suggesting that there was little measurable impact of the plume on the pollutants measured. However, this finding may have also arisen due to inaccurate prediction of the ground level location of the plume.~~ Nevertheless, the sensitivity analysis we conducted was designed to address this potential weakness. The findings of that analysis support the original analysis.

1  
2  
3 Our finding that eNO, an indicator of airway inflammation, was increased at the heavily  
4 trafficked site is consistent with evidence of increased airway inflammation after exposure to  
5 TRAP (or diesel) in previous studies. These studies have varied in their measured end-points  
6 but include “real-world” exposure studies investigating neutrophilic airway inflammation[4,  
7 5], associations between eNO and PM<sub>2.5</sub>, black carbon and fine particle counts[6] and  
8 chamber studies reporting increased neutrophilic airway inflammation,[22-25] increases in  
9 pro-inflammatory cytokines IL-6[26] and IL-8,[25] increased exhaled carbon monoxide  
10 (CO),[22] and increased airway resistance[26, 27].  
11  
12  
13  
14  
15  
16  
17  
18  
19  
20  
21  
22

23 The absence of effects on spirometric function, even at the heavily-trafficked site, is  
24 consistent with findings of chamber studies of diesel exhaust,[22, 24-27] high particle  
25 concentrations,[28] and NO<sub>2</sub>,[29] an in-tunnel study[30] and a commuter study[8]. However,  
26 our findings are inconsistent with the London study of diesel exhaust exposures which  
27 demonstrated small reductions in FEV<sub>1</sub> after 1-2 hr exposures.[5]  
28  
29  
30  
31  
32  
33  
34  
35

36 Strengths of the study include the randomised cross-over design and blinding of participants  
37 by using upwind and downwind stack sites. It is unlikely that the participants were aware of  
38 the upwind/downwind status of their location on any given day. The study was further  
39 strengthened by including the heavily trafficked sites as a positive control. The finding that  
40 pollutant levels were higher, and that subjects had greater airway inflammation, eye and chest  
41 symptom scores at this site, support the validity of the study methodology. The before/after  
42 nature of our study and repeated measures within and across years also strengthened the study  
43 design.  
44  
45  
46  
47  
48  
49  
50  
51  
52  
53  
54  
55  
56  
57  
58  
59  
60

1  
2  
3 A limitation of our study is the differential loss from the groups over time. Common reasons  
4  
5 for non-participation in follow-up years were travel overseas, residence relocation and  
6  
7 changing work practices, all factors unrelated to the experience of study participation.  
8  
9

10  
11 In conclusion, while we found that this ventilation stack, under current operating conditions,  
12  
13 had little measurable short-term health impact, we did demonstrate adverse health effects  
14  
15 attributable to short term exposures to TRAP at heavily trafficked locations. These findings  
16  
17 support evidence from existing studies of the adverse health effects attributable to short-term  
18  
19 exposures to TRAP.  
20  
21

#### 22 23 24 25 **Competing interests:**

26  
27 Nectarios Rose was employed with the NSW Health Department on the Biostatistics Training  
28  
29 Scheme at the time the study was conducted.  
30  
31

#### 32 33 34 **Authors' Contributions:**

35  
36 CC organised and participated in all aspects of the study including study design, ethics  
37  
38 clearances, recruiting subjects, field work, statistical analysis and led manuscript preparation.  
39  
40 WE was involved in all field work. WX contributed to study design and data analysis. WL  
41  
42 conducted air quality exposure assessment measurements in the field and provided advice on  
43  
44 air quality measurement. NR contributed biostatistical expertise. MR conducted air quality  
45  
46 measurements in the field and wind rose analyses. GM participated in the study design,  
47  
48 statistical analysis, and provided general oversight of the study. All authors contributed to the  
49  
50 preparation of the manuscript.  
51  
52  
53  
54

#### 55 56 **Acknowledgments:** 57 58 59 60

1  
2  
3 We are grateful to the volunteers for their participation in this study. Professor Bert  
4  
5 Brunekreef, Vicky Sheppard and Michael Staff gave initial advice on the study design. We  
6  
7 acknowledge the invaluable assistance of the following research staff: Brett Toelle, Elena  
8  
9 Belousova, Adriana Cortes-Waterman, Kitty Ng, Angelica Ordonez, Paula Garay, Adrian  
10  
11 Forero, Jennifer Manning, Renate Thielbeer. The study was overseen by a Scientific  
12  
13 Advisory Group established by the NSW Health Department which provided advice on study  
14  
15 design, methodology, analysis and interpretation. It consisted of Professor Bruce Armstrong,  
16  
17 Professor Judy Simpson, Associate Professor Bin Jalaludin, Dr Peter Lewis, and Dr Gavin  
18  
19 Fisher.  
20  
21  
22  
23  
24

25 **Data sharing:**

26  
27 Participants did not provide consent for data sharing but the presented data are anonymised  
28  
29 and risk of identification is low. Ethics clearance will need to be sought.  
30  
31  
32  
33  
34  
35  
36  
37  
38  
39  
40  
41  
42  
43  
44  
45  
46  
47  
48  
49  
50  
51  
52  
53  
54  
55  
56  
57  
58  
59  
60

**REFERENCES**

1. NHMRC. Air Quality In and Around Traffic Tunnels. Final Report 2008. Commonwealth of Australia. ISBN online 1864963573. Available: <http://www.nhmrc.gov.au/guidelines/publications/eh42> [Accessed: 25 February, 2011].
2. Kuykendall JR, Shaw SL, Paustenbach D, et al. Chemicals present in automobile traffic tunnels and the possible community health hazards: A review of the literature. *Inhal Toxicol* 2009;21:747-92.
3. Capon A, Sheppard V, Irvine K, et al. Investigating health effects in a community surrounding a road tunnel stack - a cross sectional study. *Environ Health* 2008;7:10.
4. Jacobs L, Nawrot T, de Geus B, et al. Subclinical responses in healthy cyclists briefly exposed to traffic-related air pollution: an intervention study. *Environ Health* 2010;9:64.
5. McCreanor J, Cullinan P, Nieuwenhuijsen MJ, et al. Respiratory Effects of Exposure to Diesel Traffic in Persons with Asthma. *N Engl J Med* 2007;357:2348-58.
6. Adar SD, Adamkiewicz G, Gold DR, et al. Ambient and Microenvironmental Particles and Exhaled Nitric Oxide before and after a Group Bus Trip. *Environ Health Perspect* 2007;115:507-12.
7. Strak M, Boogaard H, Meliefste K, et al. Respiratory health effects of ultrafine and fine particle exposure in cyclists. *Occup Environ Med* 2010;67:118-24.
8. Zuurbier M, Hoek G, Oldenwening M, et al. Respiratory Effects of Commuters' Exposure to Air Pollution in Traffic. *Epidemiology* 2011;22:219-27.
9. Adar SD, Gold DR, Coull BA, et al. Focused exposures to airborne traffic particles and heart rate variability in the elderly. *Epidemiology* 2007;18:95-103.

- 1  
2  
3 10. Dales R, Liu L, Szyszkowicz M, et al. Particulate air pollution and vascular reactivity:  
4 the bus stop study. *Int Arch Occup Environ Health* 2007;81:159-64.  
5  
6  
7  
8  
9 11. Laumbach RJ, Rich DQ, Gandhi S, et al. Acute Changes in Heart Rate Variability in  
10 Subjects With Diabetes Following a Highway Traffic Exposure. *J Occup Environ Med* 2010  
11 Mar;52:324-31.  
12  
13  
14  
15  
16 12. Zuurbier M, Hoek G, Oldenwening M, et al. In-Traffic Air Pollution Exposure and  
17 CC16, Blood Coagulation, and Inflammation Markers in Healthy Adults. *Environ Health*  
18 *Perspect* 2011;119:1384-9.  
19  
20  
21  
22  
23  
24 13. Weichenthal S, Kulka R, Dubeau A, et al. Traffic-Related Air Pollution and Acute  
25 Changes in Heart Rate Variability and Respiratory Function in Urban Cyclists. *Environ*  
26 *Health Perspect* 2011;119:1373-8.  
27  
28  
29  
30  
31 14. RTA. Annual Average Daily Traffic (AADT) data. Sydney Region, 2005. Available:  
32 [http://www.rta.nsw.gov.au/trafficinformation/downloads/aadtdata\\_dl1.html](http://www.rta.nsw.gov.au/trafficinformation/downloads/aadtdata_dl1.html) [Accessed 16  
33  
34  
35  
36  
37  
38  
39 15. ISAAC. Worldwide variation in the prevalence of symptoms of asthma, allergic  
40 rhinoconjunctivitis, and atopic eczema: ISAAC. *Lancet* 1998;351:1225-32.  
41  
42  
43  
44 16. Toelle B, Ng K, Belousova E, et al. The prevalence of asthma and allergy in  
45 schoolchildren in Belmont, Australia: three cross sectional surveys over 20 years. *BMJ*  
46 2004;328:386-87.  
47  
48  
49  
50  
51  
52 17. Nordin S, Millqvist E, Lowhagen O, et al. A short Chemical Sensitivity Scale for  
53 assessment of airway sensory hyperreactivity. *Int Arch Occup Environ Health* 2004;77:249-  
54  
55  
56  
57  
58  
59  
60



- 1  
2  
3 18. American Thoracic Society. ATS/ERS recommendations for the standardization  
4  
5 procedures for the online and offline measurement of exhaled lower respiratory nitric oxide  
6  
7 and nasal nitric oxide, 2005. *Am J Respir Crit Care Med* 2005;171:912-30.  
8  
9  
10 19. Salome C, Roberts A, Brown N, et al. Exhaled nitric oxide in a population sample of  
11  
12 young adults. *Am J Respir Crit Care Med* 1999;159:911-6.  
13  
14  
15 20. Peat J, Mhrshahi S, Kemp A, et al. Three-year outcomes of dietary fatty acid  
16  
17 modification and house dust mite reduction in the Childhood Asthma Prevention Study. *J*  
18  
19 *Allergy Clin Immunol* 2004;114:807-13.  
20  
21  
22 21. Team Ferrari Environmental. Audit of Ambient Air Monitoring. Lane Cove Tunnel  
23  
24 2006; November 2006, NSW, Australia.  
25  
26  
27  
28 22. Nightingale JA, Maggs R, Cullinan P, et al. Airway Inflammation after Controlled  
29  
30 Exposure to Diesel Exhaust Particulates. *Am J Respir Crit Care Med* 2000;162:161-66.  
31  
32  
33 23. Nordenhall C, Pourazar J, Blomberg A, et al. Airway inflammation following  
34  
35 exposure to diesel exhaust: a study of time kinetics using induced sputum. *Eur Respir J*  
36  
37 2000;15:1046-51.  
38  
39  
40 24. Salvi S, Blomberg A, Rudell B, et al. Acute Inflammatory Responses in the Airways  
41  
42 and Peripheral Blood After Short-Term Exposure to Diesel Exhaust in Healthy Human  
43  
44 Volunteers. *Am J Respir Crit Care Med* 1999;159:702-09.  
45  
46  
47  
48 25. Stenfors N, Nordenhall C, Salvi SS, et al. Different airway inflammatory responses in  
49  
50 asthmatic and healthy humans exposed to diesel. *Eur Respir J* 2004;23:82-86.  
51  
52  
53  
54 26. Nordenhall C, Pourazar J, Ledin M-C, et al. Diesel exhaust enhances airway  
55  
56 responsiveness in asthmatic subjects. *Eur Respir J* 2001;17:909-15.  
57  
58  
59  
60

- 1  
2  
3 27. Rudell B, Ledin MC, Hammarstrom U, et al. Effects on symptoms and lung function  
4 in humans experimentally exposed to diesel exhaust. *Occup Environ Med* 1996;53:658-62.  
5  
6  
7  
8 28. Gong H, Linn WS, Sioutas C, et al. Controlled Exposures of Healthy and Asthmatic  
9 Volunteers to Concentrated Ambient Fine Particles in Los Angeles. *Inhal Toxicol*  
10 2003;15:305-25.  
11  
12  
13  
14  
15  
16 29. Hesterberg TW, Bunn WB, McClellan RO, et al. Critical review of the human data on  
17 short-term nitrogen dioxide (NO<sub>2</sub>) exposures: Evidence for NO<sub>2</sub> no-effect levels. *Crit Rev*  
18 *Toxicol* 2009;39:743-81.  
19  
20  
21  
22  
23  
24 30. Larsson B-M, Grunewald J, Sköld CM, et al. Limited airway effects in mild  
25 asthmatics after exposure to air pollution in a road tunnel. *Resp Med* 2010;104:1912-18.  
26  
27  
28  
29  
30  
31  
32  
33  
34  
35  
36  
37  
38  
39  
40  
41  
42  
43  
44  
45  
46  
47  
48  
49  
50  
51  
52  
53  
54  
55  
56  
57  
58  
59  
60

1  
2  
3  
4  
5  
6  
7  
8  
9  
10  
11  
12  
13  
14  
15  
16  
17  
18  
19  
20  
21  
22  
23  
24  
25  
26  
27  
28  
29  
30  
31  
32  
33  
34  
35  
36  
37  
38  
39  
40  
41  
42  
43  
44  
45  
46  
47  
48  
49  
50  
51  
52  
53  
54  
55  
56  
57  
58  
59  
60

**Figure Legends**

Figure 1 Schematic of fieldwork

Figure 2 Study area and field sites

For peer review only



Figure 1. Schematic of fieldwork

Figure 1 Schematic of fieldwork  
254x190mm (96 x 96 DPI)

Review only

1  
2  
3  
4  
5  
6  
7  
8  
9  
10  
11  
12  
13  
14  
15  
16  
17  
18  
19  
20  
21  
22  
23  
24  
25  
26  
27  
28  
29  
30  
31  
32  
33  
34  
35  
36  
37  
38  
39  
40  
41  
42  
43  
44  
45  
46  
47  
48  
49  
50  
51  
52  
53  
54  
55  
56  
57  
58  
59  
60

1  
2  
3  
4  
5  
6  
7  
8  
9  
10  
11  
12  
13  
14  
15  
16  
17  
18  
19  
20  
21  
22  
23  
24  
25  
26  
27  
28  
29  
30  
31  
32  
33  
34  
35  
36  
37  
38  
39  
40  
41  
42  
43  
44  
45  
46  
47  
48  
49  
50  
51  
52  
53  
54  
55  
56  
57  
58  
59  
60



Figure 2. Study area and field sites

Figure 2 Study area and field sites  
254x190mm (96 x 96 DPI)

Review only

**Table 1 Characteristics of cohort members participating in each study year**

|                                        | Prevalence of symptoms (%)  |                               |                               | Prevalence of characteristics recorded in baseline year (2006) for cohort remaining in 2007 and 2008 (%) |      |      |
|----------------------------------------|-----------------------------|-------------------------------|-------------------------------|----------------------------------------------------------------------------------------------------------|------|------|
|                                        | 2006                        | 2007                          | 2008                          | 2006                                                                                                     | 2007 | 2008 |
| Number of respondents                  | 36                          | 26                            | 20                            | 36                                                                                                       | 26   | 20   |
| <b>Baseline questionnaire symptoms</b> |                             |                               |                               |                                                                                                          |      |      |
| Asthma (ever diagnosis)                | 25                          | 35                            | 25                            | 25                                                                                                       | 35   | 25   |
| Ever wheezed                           | 42                          | 50                            | 40                            | 42                                                                                                       | 46   | 45   |
| Wheeze (in last 3 mths)                | 25                          | 19                            | 5                             | 25                                                                                                       | 31   | 20   |
| Wheeze attacks (in last 3 mths)        | 19                          | 19                            | 5                             | 19                                                                                                       | 23   | 15   |
| Breathless (in last 3 mths)            | 11                          | 19                            | 5                             | 11                                                                                                       | 15   | 10   |
| Cough (in last 3 mths)                 | 56                          | 50                            | 45                            | 56                                                                                                       | 50   | 50   |
| Ever taken asthma medication           | 42                          | 46                            | 40                            | 42                                                                                                       | 46   | 45   |
| Asthma medication (in last 3 mths)     | 22                          | 31                            | 25                            | 22                                                                                                       | 27   | 25   |
| Inhaled steroids (in last 3 mths)      | 17                          | 31                            | 25                            | 17                                                                                                       | 19   | 20   |
| <b>Spirometry &amp; eNO</b>            |                             |                               |                               |                                                                                                          |      |      |
|                                        | <b>2006 Lab<sup>a</sup></b> | <b>2006 Field<sup>b</sup></b> | <b>2007 Field<sup>b</sup></b> | <b>2008 Field<sup>b</sup></b>                                                                            |      |      |
| FEV1 (L)                               | 3.00                        | 2.82                          | 2.62                          | 2.57                                                                                                     |      |      |
| FVC (L)                                | 3.78                        | 3.71                          | 3.57                          | 3.52                                                                                                     |      |      |
| eNO (ppb)                              | 11.14                       | 13.8                          | 22.3                          | 12.5                                                                                                     |      |      |

<sup>a</sup> Measurements made at WIMR lung function laboratory

<sup>b</sup> Field measurements made at field sites

**Table 2 Sensitivity analysis<sup>a</sup> for contrasts<sup>b</sup> in lung function, eNO and symptom scores between the downwind site and the other two sites (upwind and heavily trafficked) adjusted for change from baseline (2006) to subsequent years.**

| Contrast                                                       |                              | FEV1<br>(difference in litres)<br>(95% CI) | FVC<br>(difference in litres)<br>(95% CI) | eNO<br>Ratio (95% CI) | EYE symptoms<br>(diff in score)<br>(95% CI) | THROAT<br>symptoms<br>(diff in score)<br>(95% CI) |
|----------------------------------------------------------------|------------------------------|--------------------------------------------|-------------------------------------------|-----------------------|---------------------------------------------|---------------------------------------------------|
| Location                                                       | Year                         |                                            |                                           |                       |                                             |                                                   |
| Downwind vs<br>(Heavily trafficked<br>and Upwind) <sup>c</sup> | 2007/08 vs 2006 <sup>d</sup> | 0.04 (-0.02, 0.09)                         | 0.10 (0.02, 0.18)                         | 1.10 (0.97, 1.25)     | 0.064 (-0.061, 0.190)                       | 0.149 (-0.171, 0.469)                             |
|                                                                | 2007 vs 2006                 | 0.05 (-0.01, 0.11)                         | 0.11 (0.03, 0.20)                         | 1.13 (0.99, 1.28)     | -0.008 (-0.130, 0.114)                      | 0.089 (-0.270, 0.448)                             |
|                                                                | 2008 vs 2006                 | 0.02 (-0.04, 0.09)                         | 0.11 (0.01, 0.21)                         | 1.09 (0.94, 1.27)     | 0.131 (-0.014, 0.276)                       | 0.230 (-0.109, 0.569)                             |
| Downwind vs<br>Upwind                                          | 2007/08 vs 2006              | 0.02 (-0.05, 0.08)                         | 0.11 (0.02, 0.20)                         | 1.11 (0.96, 1.29)     | 0.039 (-0.106, 0.184)                       | 0.132 (-0.238, 0.501)                             |
|                                                                | 2007 vs 2006                 | 0.03 (-0.04, 0.10)                         | 0.11 (0.01, 0.21)                         | 1.21 (1.04, 1.40)     | -0.043 (-0.184, 0.098)                      | 0.084 (-0.330, 0.497)                             |
|                                                                | 2008 vs 2006                 | -0.01 (-0.08, 0.07)                        | 0.13 (0.01, 0.24)                         | 1.06 (0.89, 1.27)     | 0.112 (-0.057, 0.280)                       | 0.232 (-0.163, 0.626)                             |
| Downwind vs<br>Heavily trafficked                              | 2007/08 vs 2006 <sup>d</sup> | 0.06 (0.01, 0.12)                          | 0.10 (0.01, 0.18)                         | 1.08 (0.95, 1.24)     | 0.089 (-0.044, 0.222)                       | 0.166 (-0.174, 0.506)                             |
|                                                                | 2007 vs 2006                 | 0.07 (0.002, 0.13)                         | 0.11 (0.02, 0.20)                         | 1.05 (0.92, 1.21)     | 0.027 (-0.104, 0.158)                       | 0.094 (-0.292, 0.480)                             |
|                                                                | 2008 vs 2006                 | 0.05 (-0.02, 0.12)                         | 0.09 (-0.01, 0.20)                        | 1.12 (0.96, 1.31)     | 0.150 (-0.005, 0.304)                       | 0.228 (-0.133, 0.590)                             |
| Heavily trafficked vs<br>(Upwind and<br>Downwind) <sup>e</sup> | Overall                      | -0.004 (-0.03, 0.02)                       | -0.02 (-0.05, 0.01)                       | 1.09 (1.04, 1.15)     | 0.039 (-0.011, 0.089)                       | 0.102 (-0.025, 0.230)                             |

| Contrast                                                               |                                    | CHEST symptoms<br>(diff in score)<br>(95% CI) | SNEEZE symptoms<br>(diff in score)<br>(95% CI) | DRY NOSE<br>symptoms<br>(diff in score)<br>(95% CI) | SMELL-STRONG<br>Odds ratio<br>(95% CI) | SMELL-<br>ANNOYING Odds<br>ratio<br>(95% CI) |
|------------------------------------------------------------------------|------------------------------------|-----------------------------------------------|------------------------------------------------|-----------------------------------------------------|----------------------------------------|----------------------------------------------|
| Location                                                               | Year                               |                                               |                                                |                                                     |                                        |                                              |
| <b>Downwind vs<br/>(Heavily trafficked<br/>and Upwind)<sup>c</sup></b> | <b>2007/08 vs 2006<sup>d</sup></b> | -0.179 (-0.503, 0.144)                        | 0.298 (-0.344, 0.941)                          | 0.013 (-0.307, 0.333)                               | 3.07 (1.02, 9.25)                      | 1.58 (0.46, 5.46)                            |
|                                                                        | <b>2007 vs 2006</b>                | -0.105 (-0.428, 0.217)                        | 0.347 (-0.297, 0.992)                          | 0.045 (-0.294, 0.384)                               | 3.66 (1.16, 11.49)                     | 1.36 (0.38, 4.90)                            |
|                                                                        | <b>2008 vs 2006</b>                | -0.264 (-0.661, 0.133)                        | 0.138 (-0.489, 0.764)                          | -0.011 (-0.368, 0.346)                              | 2.19 (0.56, 8.54)                      | 1.20 (0.26, 5.58)                            |
| <b>Downwind vs<br/>Upwind</b>                                          | <b>2007/08 vs 2006<sup>d</sup></b> | -0.030 (-0.403, 0.343)                        | 0.373 (-0.369, 1.116)                          | -0.106 (-0.476, 0.264)                              | 3.26 (0.92, 11.60)                     | 1.10 (0.25, 4.80)                            |
|                                                                        | <b>2007 vs 2006</b>                | 0.036 (-0.336, 0.407)                         | 0.321 (-0.422, 1.064)                          | -0.155 (-0.545, 0.236)                              | 2.73 (0.74, 10.09)                     | 0.75 (0.17, 3.39)                            |
|                                                                        | <b>2008 vs 2006</b>                | -0.073 (-0.535, 0.390)                        | 0.291 (-0.439, 1.021)                          | -0.051 (-0.467, 0.366)                              | 3.40 (0.68, 16.94)                     | 1.02 (0.16, 6.49)                            |
| <b>Downwind vs<br/>Heavily trafficked</b>                              | <b>2007/08 vs 2006<sup>d</sup></b> | -0.329 (-0.672, 0.015)                        | 0.224 (-0.461, 0.908)                          | 0.132 (-0.208, 0.473)                               | 2.89 (0.90, 9.27)                      | 2.27 (0.63, 8.13)                            |
|                                                                        | <b>2007 vs 2006</b>                | -0.247 (-0.593, 0.100)                        | 0.374 (-0.321, 1.069)                          | 0.244 (-0.121, 0.609)                               | 4.90 (1.43, 16.83)                     | 2.47 (0.65, 9.42)                            |
|                                                                        | <b>2008 vs 2006</b>                | -0.455 (-0.879, -0.031)                       | -0.016 (-0.687, 0.655)                         | 0.028 (-0.353, 0.410)                               | 1.41 (0.34, 5.92)                      | 1.42 (0.29, 7.02)                            |
| <b>Heavily trafficked vs<br/>(Upwind and<br/>Downwind)<sup>e</sup></b> | <b>Overall</b>                     | 0.171 (0.042, 0.300)                          | 0.167 (-0.091, 0.426)                          | 0.015 (-0.113, 0.144)                               | 1.89 (1.22, 2.92)                      | 3.63 (2.23, 5.89)                            |

<sup>a</sup> 5 downwind sites and 2 upwind sites in 2006, 2 downwind sites and 2 upwind sites in 2008, and 1 heavily trafficked site in 2006 were excluded for the sensitivity analysis.

<sup>b</sup> Contrasts are derived from mixed effects regression model in which location and year, and the interaction between them are fixed effects, and individual subject intercepts are a random effect. Main contrasts of interest are those included in the table and consist of downwind versus other exposures, as the downwind exposure is the primary exposure of interest.

<sup>c</sup> Represents the comparison of downwind versus heavily trafficked and upwind sites combined.

<sup>d</sup> 2007/08 vs 2006 represents the comparison of both post-tunnel years combined (2007/08) versus the pre-tunnel year (2006).

<sup>e</sup> This represents the comparison of the heavily trafficked site compared to the two stack sites combined, overall (data from all years included), as we anticipated the heavily trafficked site to have higher air pollution levels and health effects to be most prominent for this exposure.



1  
2  
3  
4  
5  
6  
7  
8  
9  
10  
11  
12  
13  
14  
15  
16  
17  
18  
19  
20  
21  
22  
23  
24  
25  
26  
27  
28  
29  
30  
31  
32  
33  
34  
35  
36  
37  
38  
39  
40  
41  
42  
43  
44  
45  
46  
47  
48  
49

**Table 3 Mean pollutant levels by location and year**

| Pollutant                                     | Year | Location           | Total samples | Mean <sup>a</sup> | Median <sup>a</sup> | IQR        | Minimum | Maximum | 95 <sup>th</sup> percentile |
|-----------------------------------------------|------|--------------------|---------------|-------------------|---------------------|------------|---------|---------|-----------------------------|
| <i><b>Nitrogen oxides</b></i> <sup>b</sup>    |      |                    |               |                   |                     |            |         |         |                             |
| NOx                                           | 2006 | Heavily trafficked | 55            | 112.0             | 107.9               | 49.9-142.9 | 28.7    | 426.0   | 269.0                       |
|                                               |      | Downwind           | 56            | 34.6              | 37.2                | 16.7-50.5  | 5.7     | 89.7    | 79.4                        |
|                                               |      | Upwind             | 51            | 35.4              | 31.1                | 12.6-47.3  | 2.4     | 100.8   | 91.0                        |
|                                               | 2007 | Heavily trafficked | 51            | 239.8             | 128.6               | 67.1-234.0 | 14.8    | 1912.0  | 784.0                       |
|                                               |      | Downwind           | 52            | 30.2              | 16.2                | 8.4-44.5   | 4.6     | 117.9   | 96.8                        |
|                                               |      | Upwind             | 46            | 37.0              | 20.7                | 12.2-57.2  | 3.5     | 152.4   | 93.1                        |
|                                               | 2008 | Heavily trafficked | 54            | 26.7              | 16.8                | 9.9-28.6   | 5.5     | 115.7   | 98.0                        |
|                                               |      | Downwind           | 51            | 6.8               | 7.1                 | 4.3-8.5    | 2.1     | 18.9    | 13.0                        |
|                                               |      | Upwind             | 53            | 6.2               | 5.1                 | 3.6-8.2    | 2.5     | 16.7    | 12.5                        |
| NO2                                           | 2006 | Heavily trafficked | 55            | 4.3               | 4.1                 | 3.0-5.2    | 1.3     | 12.0    | 8.0                         |
|                                               |      | Downwind           | 56            | 3.2               | 3.2                 | 2.1-4.3    | 1.3     | 5.7     | 5.1                         |
|                                               |      | Upwind             | 51            | 2.4               | 2.1                 | 1.7-3.0    | 0.5     | 16.0    | 4.2                         |
|                                               | 2007 | Heavily trafficked | 51            | 13.5              | 13.6                | 5.0-17.6   | 1.4     | 69.0    | 31.0                        |
|                                               |      | Downwind           | 52            | 4.9               | 5.1                 | 1.6-7.1    | 0.1     | 18.2    | 9.5                         |
|                                               |      | Upwind             | 47            | 5.9               | 4.8                 | 2.9-6.8    | 0.1     | 15.7    | 13.8                        |
|                                               | 2008 | Heavily trafficked | 54            | 0.6               | 1.5                 | 0.1-1.7    | 0.1     | 4.1     | 3.2                         |
|                                               |      | Downwind           | 51            | 1.1               | 1.1                 | 0.8-1.4    | 0.1     | 2.7     | 2.2                         |
|                                               |      | Upwind             | 53            | 1.1               | 1.0                 | 0.7-1.4    | 0.1     | 2.3     | 2.0                         |
| <i><b>Particulate matter</b></i> <sup>c</sup> |      |                    |               |                   |                     |            |         |         |                             |
| PM10                                          | 2006 | Heavily trafficked | 372           | 74.2              | 81.2                | 46.3-99.1  | 17.9    | 168.1   | 118.7                       |
|                                               |      | Downwind           | 374           | 58.1              | 57.0                | 33.4-84.0  | 15.1    | 195.1   | 106.7                       |

| Pollutant | Year   | Location           | Total samples | Mean <sup>a</sup> | Median <sup>a</sup> | IQR       | Minimum | Maximum | 95 <sup>th</sup> percentile |
|-----------|--------|--------------------|---------------|-------------------|---------------------|-----------|---------|---------|-----------------------------|
| PM2.5     | 2007   | Upwind             | 409           | 69.0              | 57.1                | 40.7-97.6 | 13.4    | 184.8   | 152.4                       |
|           |        | Heavily trafficked | 352           | 42.0              | 38.8                | 30.8-47.7 | 14.8    | 230.9   | 71.0                        |
|           |        | Downwind           | 420           | 38.5              | 40.8                | 28.8-48.8 | 10.9    | 74.4    | 58.8                        |
|           | 2008   | Upwind             | 370           | 38.9              | 36.9                | 25.8-50.4 | 9.8     | 136.2   | 75.6                        |
|           |        | Heavily trafficked | 310           | 39.4              | 40.3                | 32.9-44.9 | 25.3    | 81.6    | 50.6                        |
|           |        | Downwind           | 305           | 26.6              | 24.4                | 23.2-30.3 | 16.1    | 37.9    | 34.2                        |
|           | 2006   | Upwind             | 308           | 26.5              | 23.5                | 21.5-30.8 | 16.2    | 61.2    | 38.5                        |
|           |        | Heavily trafficked | 372           | 14.2              | 15.3                | 9.8-17.3  | 3.9     | 33.6    | 23.4                        |
|           |        | Downwind           | 374           | 11.3              | 10.6                | 6.6-15.2  | 3.4     | 25.2    | 22.3                        |
|           |        | Upwind             | 409           | 13.1              | 10.8                | 9.2-14.6  | 3.1     | 44.3    | 31.8                        |
|           |        | Heavily trafficked | 352           | 12.9              | 15.1                | 8.0-17.4  | 2.4     | 32.5    | 18.9                        |
|           |        | Downwind           | 420           | 10.9              | 12.8                | 7.6-15.1  | 1.3     | 18.2    | 16.4                        |
|           |        | Upwind             | 370           | 11.1              | 13.0                | 7.5-15.4  | 1.2     | 19.7    | 17.6                        |
|           |        | Heavily trafficked | 310           | 11.8              | 12.0                | 10.6-13.2 | 8.7     | 17.8    | 14.7                        |
|           |        | Downwind           | 305           | 10.7              | 10.0                | 9.6-11.0  | 8.1     | 16.4    | 13.9                        |
| PM1       | 2006   | Upwind             | 308           | 10.8              | 10.5                | 9.7-11.6  | 8.3     | 16.3    | 14.2                        |
|           |        | Heavily trafficked | 372           | 2.4               | 2.4                 | 1.7-2.8   | 0.6     | 6.8     | 4.1                         |
|           |        | Downwind           | 374           | 1.8               | 1.6                 | 1.1-2.4   | 0.4     | 5.1     | 3.9                         |
|           | 2007   | Upwind             | 409           | 2.1               | 1.5                 | 1.3-2.2   | 0.4     | 10.4    | 5.6                         |
|           |        | Heavily trafficked | 352           | 2.6               | 3.1                 | 1.8-3.3   | 0.7     | 8.0     | 4.1                         |
|           |        | Downwind           | 420           | 1.9               | 2.3                 | 1.4-2.6   | 0.2     | 3.9     | 2.8                         |
| 2008      | Upwind | 370                | 2.0           | 2.3               | 1.4-2.6             | 0.1       | 5.2     | 3.1     |                             |

| Pollutant                          | Year             | Location           | Total samples      | Mean <sup>a</sup> | Median <sup>a</sup> | IQR       | Minimum   | Maximum | 95 <sup>th</sup> percentile |  |
|------------------------------------|------------------|--------------------|--------------------|-------------------|---------------------|-----------|-----------|---------|-----------------------------|--|
| <b>VOC<sup>d</sup><br/>Benzene</b> | <b>2008</b>      | Heavily trafficked | 310                | 2.3               | 2.3                 | 2.0-2.5   | 1.6       | 3.9     | 2.9                         |  |
|                                    |                  | Downwind           | 305                | 2.0               | 1.9                 | 1.7-2.1   | 1.6       | 3.0     | 2.6                         |  |
|                                    |                  | Upwind             | 308                | 2.0               | 2.1                 | 1.8-2.3   | 1.4       | 3.6     | 2.5                         |  |
|                                    | <b>2006</b>      | Heavily trafficked | 6                  | 1.16              | 1.07                | 0.98-1.40 | 0.74      | 1.70    |                             |  |
|                                    |                  | Downwind           | 6                  | 0.57              | 0.55                | 0.44-0.69 | 0.42      | 0.75    |                             |  |
|                                    |                  | Upwind             | 6                  | 0.52              | 0.49                | 0.31-0.70 | 0.25      | 0.87    |                             |  |
|                                    | <b>Butadiene</b> | <b>2008</b>        | Heavily trafficked | 6                 | 0.56                | 0.44      | 0.42-0.71 | 0.35    | 1.00                        |  |
|                                    |                  |                    | Downwind           | 6                 | 0.21                | 0.18      | 0.17-0.23 | 0.16    | 0.32                        |  |
|                                    |                  |                    | Upwind             | 6                 | 0.22                | 0.23      | 0.17-0.26 | 0.13    | 0.28                        |  |
| <b>2006</b>                        |                  | Heavily trafficked | 6                  | 0.38              | 0.33                | 0.26-0.51 | 0.23      | 0.59    |                             |  |
|                                    |                  | Downwind           | 6                  | 0.16              | 0.18                | 0.14-0.18 | 0.05      | 0.24    |                             |  |
|                                    |                  | Upwind             | 6                  | 0.14              | 0.12                | 0.08-0.17 | 0.06      | 0.30    |                             |  |
| <b>2008</b>                        |                  | Heavily trafficked | 6                  | 0.13              | 0.11                | 0.10-0.15 | 0.04      | 0.27    |                             |  |
|                                    |                  | Downwind           | 6                  | 0.06              | 0.05                | 0.04-0.08 | 0.04      | 0.13    |                             |  |
|                                    |                  | Upwind             | 6                  | 0.08              | 0.08                | 0.04-0.10 | 0.04      | 0.17    |                             |  |
| <b>Toluene</b>                     | <b>2006</b>      | Heavily trafficked | 6                  | 6.88              | 6.45                | 4.70-8.40 | 4.50      | 10.80   |                             |  |
|                                    |                  | Downwind           | 6                  | 2.80              | 2.65                | 2.50-3.00 | 2.40      | 3.60    |                             |  |
|                                    |                  | Upwind             | 6                  | 3.12              | 3.20                | 2.20-3.70 | 1.20      | 5.20    |                             |  |
|                                    | <b>2008</b>      | Heavily trafficked | 4                  | 2.80              | 2.60                | 2.05-3.55 | 1.50      | 4.50    |                             |  |
|                                    |                  | Downwind           | 4                  | 2.33              | 2.00                | 1.60-3.05 | 1.40      | 3.90    |                             |  |
|                                    |                  | Upwind             | 4                  | 4.28              | 3.90                | 3.05-5.50 | 2.30      | 7.00    |                             |  |

| Pollutant    | Year | Location           | Total samples | Mean <sup>a</sup> | Median <sup>a</sup> | IQR       | Minimum | Maximum | 95 <sup>th</sup> percentile |
|--------------|------|--------------------|---------------|-------------------|---------------------|-----------|---------|---------|-----------------------------|
| Ethylbenzene | 2006 | Heavily trafficked | 6             | 0.94              | 0.82                | 0.60-1.10 | 0.58    | 1.70    |                             |
|              |      | Downwind           | 6             | 0.51              | 0.51                | 0.40-0.60 | 0.36    | 0.70    |                             |
|              |      | Upwind             | 6             | 0.49              | 0.38                | 0.30-0.44 | 0.24    | 1.20    |                             |
|              | 2008 | Heavily trafficked | 6             | 0.39              | 0.29                | 0.17-0.36 | 0.15    | 1.10    |                             |
|              |      | Downwind           | 6             | 0.40              | 0.21                | 0.12-0.26 | 0.09    | 1.50    |                             |
|              |      | Upwind             | 6             | 0.52              | 0.27                | 0.12-0.47 | 0.09    | 1.90    |                             |
| mp-xylene    | 2006 | Heavily trafficked | 6             | 3.99              | 3.31                | 2.40-5.20 | 1.99    | 7.70    |                             |
|              |      | Downwind           | 6             | 1.88              | 1.65                | 1.40-2.50 | 1.30    | 2.80    |                             |
|              |      | Upwind             | 6             | 1.74              | 1.55                | 0.90-1.60 | 0.86    | 4.00    |                             |
|              | 2008 | Heavily trafficked | 6             | 0.88              | 0.81                | 0.60-1.10 | 0.55    | 1.40    |                             |
|              |      | Downwind           | 6             | 0.61              | 0.49                | 0.38-0.53 | 0.28    | 1.50    |                             |
|              |      | Upwind             | 6             | 0.68              | 0.46                | 0.31-0.81 | 0.30    | 1.80    |                             |
| o-xylene     | 2006 | Heavily trafficked | 6             | 1.44              | 1.23                | 0.90-1.80 | 0.78    | 2.70    |                             |
|              |      | Downwind           | 6             | 0.74              | 0.70                | 0.54-0.92 | 0.50    | 1.10    |                             |
|              |      | Upwind             | 6             | 0.70              | 0.59                | 0.39-0.67 | 0.35    | 1.60    |                             |
|              | 2008 | Heavily trafficked | 6             | 0.37              | 0.34                | 0.23-0.46 | 0.22    | 0.61    |                             |
|              |      | Downwind           | 6             | 0.26              | 0.19                | 0.13-0.21 | 0.13    | 0.70    |                             |
|              |      | Upwind             | 6             | 0.28              | 0.21                | 0.13-0.32 | 0.10    | 0.68    |                             |

<sup>a</sup> Means and medians calculated by taking the mean of daily averages at each site. IQR, minimum and maximum values using all (not averaged) data.

1  
2  
3  
4  
5  
6  
7  
8  
9  
10  
11  
12  
13  
14  
15  
16  
17  
18  
19  
20  
21  
22  
23  
24  
25  
26  
27  
28  
29  
30  
31  
32  
33  
34  
35  
36  
37  
38  
39  
40  
41  
42  
43  
44  
45  
46  
47  
48  
49

- b Grab sample collected for NO<sub>2</sub> and NO<sub>x</sub> analysis at each every 15 minutes and averaged for each two hour exposure period.
- c PM data collected every two minutes.
- d One VOC sample collected at each site to provide average reading for each two hour exposure period.  
2007 data not used in analysis due to different detection limits used by different laboratory.  
95<sup>th</sup> percentile not reported for VOCs as sample size too small; 95<sup>th</sup> percentile equivalent to maximum reading.

For peer review only

Table 4 Sensitivity analysis<sup>a</sup> for pollutant contrasts

| Contrast                                    |                | NO <sub>x</sub> ratio<br>(95% CI) | NO <sub>2</sub> ratio<br>(95% CI) | PM <sub>10</sub> ratio<br>(95% CI) | PM <sub>2.5</sub> ratio<br>(95% CI) | PM <sub>1</sub> ratio<br>(95% CI) |
|---------------------------------------------|----------------|-----------------------------------|-----------------------------------|------------------------------------|-------------------------------------|-----------------------------------|
| Location                                    | Year           |                                   |                                   |                                    |                                     |                                   |
| Downwind vs (Heavily trafficked and Upwind) | 2007/8 vs 2006 | 0.97 (0.29, 3.29)                 | 0.84 (0.25, 2.86)                 | 1.14 (0.57, 2.26)                  | 1.22 (0.42, 3.58)                   | 1.26 (0.50, 3.19)                 |
|                                             | 2007 vs 2006   | 0.69 (0.16, 2.92)                 | 0.52 (0.14, 2.00)                 | 1.24 (0.56, 2.75)                  | 1.15 (0.31, 4.21)                   | 1.12 (0.37, 3.44)                 |
|                                             | 2008 vs 2006   | 1.37 (0.55, 3.39)                 | 1.36 (0.45, 4.05)                 | 1.05 (0.50, 2.17)                  | 1.30 (0.66, 2.55)                   | 1.42 (0.77, 2.61)                 |
| Downwind vs Upwind                          | 2007/8 vs 2006 | 1.37 (0.34, 5.61)                 | 0.75 (0.18, 3.06)                 | 1.41 (0.64, 3.11)                  | 1.43 (0.41, 4.95)                   | 1.48 (0.51, 4.34)                 |
|                                             | 2007 vs 2006   | 1.02 (0.19, 5.43)                 | 0.59 (0.13, 2.76)                 | 1.43 (0.57, 3.58)                  | 1.40 (0.32, 6.24)                   | 1.39 (0.38, 5.02)                 |
|                                             | 2008 vs 2006   | 1.84 (0.64, 5.28)                 | 0.94 (0.26, 3.38)                 | 1.39 (0.59, 3.27)                  | 1.45 (0.66, 3.20)                   | 1.59 (0.78, 3.24)                 |
| Downwind vs Heavily trafficked              | 2007/8 vs 2006 | 0.69 (0.19, 2.51)                 | 0.95 (0.26, 3.49)                 | 0.92 (0.44, 1.90)                  | 1.04 (0.33, 3.27)                   | 1.07 (0.40, 2.87)                 |
|                                             | 2007 vs 2006   | 0.46 (0.10, 2.20)                 | 0.47 (0.11, 1.99)                 | 1.07 (0.45, 2.55)                  | 0.94 (0.23, 3.83)                   | 0.91 (0.27, 3.05)                 |
|                                             | 2008 vs 2006   | 1.02 (0.39, 2.68)                 | 1.95 (0.61, 6.23)                 | 0.79 (0.36, 1.70)                  | 1.16 (0.57, 2.37)                   | 1.26 (0.66, 2.41)                 |
| Heavily trafficked vs (Upwind and Downwind) | Overall        | 3.86 (2.46, 6.04)*                | 1.42 (0.91, 2.23)                 | 1.18 (0.92, 1.53)                  | 1.12 (0.75, 1.68)                   | 1.23 (0.87, 1.74)                 |

<sup>a</sup> 5 downwind sites and 2 upwind sites in 2006, 2 downwind sites and 2 upwind sites in 2008, and 1 heavily trafficked site in 2006, were excluded for the sensitivity analysis
