# Supplementary material for: A randomised cross-over cohort study of exposure to emissions from a road tunnel ventilation stack
Source: PubMed Central journal article supplement — BMJ Open. 2012 Aug 16;2(4):e001201. doi: 10.1136/bmjopen-2012-001201 (PMC3425893; doi:10.1136/bmjopen-2012-001201), 2012-08-16
Supplement: bmjopen-2012-001201.reviewer_comments.pdf [file bmjopen-2012-001201.reviewer_comments.pdf]

## PEER REVIEW HISTORY

BMJ Open publishes all reviews undertaken for accepted manuscripts. Reviewers are asked to complete a checklist review form ([see an example](#)) and are provided with free text boxes to elaborate on their assessment. These free text comments are reproduced below. Some articles will have been accepted based in part or entirely on reviews undertaken for other BMJ Group journals. These will be reproduced where possible.

### ARTICLE DETAILS

|                            |                                                                                                      |
|----------------------------|------------------------------------------------------------------------------------------------------|
| <b>TITLE (PROVISIONAL)</b> | A randomised cross-over cohort study of exposure to emissions from a road tunnel ventilation stack   |
| <b>AUTHORS</b>             | Cowie, Christine ; Ezz, Wafaa; Xuan, Wei; Lilley, William; Rose, Nectarios; Rae, Michael; Marks, Guy |

### VERSION 1 - REVIEW

|                        |                                                                                                  |
|------------------------|--------------------------------------------------------------------------------------------------|
| <b>REVIEWER</b>        | Tim Nawrot<br>Associate professor of environmental epidemiology<br>Hasselt University<br>Belgium |
| <b>REVIEW RETURNED</b> | 02-May-2012                                                                                      |

|                                  |                                                                                                                                                                                                                                                                                                                                                                                                                                                                                                                                                                                                                                                                                                                                                                                                                                                                                                                                                                                                                                                                     |
|----------------------------------|---------------------------------------------------------------------------------------------------------------------------------------------------------------------------------------------------------------------------------------------------------------------------------------------------------------------------------------------------------------------------------------------------------------------------------------------------------------------------------------------------------------------------------------------------------------------------------------------------------------------------------------------------------------------------------------------------------------------------------------------------------------------------------------------------------------------------------------------------------------------------------------------------------------------------------------------------------------------------------------------------------------------------------------------------------------------|
| <b>THE STUDY</b>                 | <p>Cowie and colleagues estimated short-term respiratory health effects of exposure to emissions from a road tunnel ventilation stack. The authors used a mixed procedure model to account for the interdependence between subjects on different exposure scenarios including a moment before the tunnel was opened. Initially, 36 subjects participated and 20 on all moments.</p> <p>Comments</p> <ul style="list-style-type: none"><li>• no standard deviation is given in Table 2</li><li>• the study is original in design but the low number of subjects makes the use of the mixed procedure questionable. Were the residuals normally distributed? The authors should check the procedure assumptions.</li><li>• The authors made many comparisons and only a few were significant. This is a clear limitation and increase the potential type 1 error. I am not promoting Bonferonni correction but other less conservative methods for multiple adjustments might be considered. The multiple testing should also be mentioned as a limitation.</li></ul> |
| <b>RESULTS &amp; CONCLUSIONS</b> | The authors studied short term changes. I do not understand why the study runs over 3 years in other words why the different scenarios were tested within such a long period of time.                                                                                                                                                                                                                                                                                                                                                                                                                                                                                                                                                                                                                                                                                                                                                                                                                                                                               |

|                        |                                                                                                                                                |
|------------------------|------------------------------------------------------------------------------------------------------------------------------------------------|
| <b>REVIEWER</b>        | Cristina Canova<br>Respiratory Epidemiology and Public Health<br>Imperial College<br>Emmanuel Kaye Building<br>Manresa Road<br>London. SW3 6LR |
| <b>REVIEW RETURNED</b> | 28-May-2012                                                                                                                                    |

|                         |                                                                                                                                                                                                                                                                                                                                                                                                                                                                                                                                                                |
|-------------------------|----------------------------------------------------------------------------------------------------------------------------------------------------------------------------------------------------------------------------------------------------------------------------------------------------------------------------------------------------------------------------------------------------------------------------------------------------------------------------------------------------------------------------------------------------------------|
| <b>GENERAL COMMENTS</b> | <p>This is an interesting paper on the short term effect of exposure to emissions from a road tunnel using a randomised cross-over design. The paper is clear and well written. I have just a couple of minor comments.</p> <p>The main comment regards the use of an upwind location as negative control exposure that shows similar and sometimes higher levels of air pollution compared to the downwind location. This issue should be better discussed.</p> <p>I would recommend to include the number of measures for each year in study in Table 2.</p> |
|-------------------------|----------------------------------------------------------------------------------------------------------------------------------------------------------------------------------------------------------------------------------------------------------------------------------------------------------------------------------------------------------------------------------------------------------------------------------------------------------------------------------------------------------------------------------------------------------------|

### VERSION 1 – AUTHOR RESPONSE

Reviewer: Tim Nawrot

1. No standard deviation is given in Table 2

The standard deviation has been added to Table 2.

2. The study is original in design but the low number of subjects makes the use of the mixed procedure questionable. Were the residuals normally distributed? The authors should check the procedure assumptions.

We have checked the residuals which indicated that transformation of the data was not required. An additional sentence has been added to the Methods section on page 14 stating “Examination of distribution of residuals indicated that there were no major departures from normality and that transformation of the data was not required”.

3. The authors made many comparisons and only a few were significant. This is a clear limitation and increases the potential type 1 error. I am not promoting Bonferonni correction but other less conservative methods for multiple adjustments might be considered. The multiple testing should also be mentioned as a limitation.

Although multiple significance tests were performed, virtually all the “significant” findings were for the heavily trafficked site, which was the positive control site (where we expected to see adverse effects). Several outcomes were “significant” for this site and the consistency for this site means that the risk of type I error is low.

4. The authors studied short term changes. I do not understand why the study runs over 3 years in other words why the different scenaria were tested within such a long period of time.

Although the study was investigating short term effects associated with exposure to ventilation stack emissions, the study ran over three years because 2006 represented the baseline year and pre-tunnel operation, and 2007 and 2008 represented years where the tunnel was operating. The second follow-up year, 2008, was included as it was expected that traffic volumes in the tunnel would increase between 2007 and 2008. Data collection took place in one year intervals to ensure that seasonal influences were kept as constant as possible. Wording to include the above points has been included on page 7.

Reviewer 2: Cristina Canova

1. The main comment regards the use of an upwind location as negative control exposure that shows

similar and sometimes higher levels of air pollution compared to the downwind location. This issue should be better discussed.

We have expanded on this existing point in the Discussion on page 27.

2. I would recommend to include the number of measures for each year in study in Table 2

This has been included in Table 2. Please note that we have re-run the descriptive analysis after identifying that an older version of the dataset had been used for this initial analysis. This has resulted in slightly differing estimates especially for the symptom scores (not marked as tracked changes in table), however all other analyses and conclusions remain unchanged.

#### **VERSION 2 – REVIEW**

|                        |                                                                    |
|------------------------|--------------------------------------------------------------------|
| <b>REVIEWER</b>        | Tim Nawrot<br>Associate Professor<br>Hasselt University<br>Belgium |
| <b>REVIEW RETURNED</b> | 10-Jul-2012                                                        |

- The Reviewer completed the checklist but made no further comments.
